# Supplementary material for: Salt Stress Promotes Abscisic Acid Accumulation to Affect Cell Proliferation and Expansion of Primary Roots in Rice
Source: MDPI journal article supplement (doi:10.3390/ijms221910892), 2021-10-08
Supplement: s1 [file s1]

**Table S1.** Primers used in this study

| Primer name | Primer sequence (5' - 3' )  |
|-------------|-----------------------------|
| OsActin1-F  | GACCTTGCTGGGCGTGAT          |
| OsActin1-R  | GTCATAGTCCAGGGCGATGT        |
| OsEXPA4-F   | AGCCAGCGTTTAGACACCAT        |
| OsEXPA4-R   | GTGCCATACCCTTGGCTGTA        |
| OsEXPA10-F  | ATGACCTCAAGTACTGCCTC        |
| OsEXPA10-R  | CTTCTCGAAGGACTGGATGG        |
| OsEXPA18-F  | CATGGGGAACATTGTCCTGC        |
| OsEXPA18-R  | CGTACAGATTCCCGTACCCG        |
| OsEXPA25-F  | ATCTACAACGTCGTGCCCAG        |
| OsEXPA25-R  | AGCTTGAGATCATGCAGACGA       |
| TRAB1-F     | GTCAATGATGCTGCTGCTG         |
| TRAB1-R     | CCTTGCCCGCTGAATCC           |
| OsRD22-F    | TTGGTTGCTTATGCTCTA          |
| OsRD22-R    | CACCCGTATCATCTACTA          |
| OsBZ8-F     | CACCTAATGATAGACCTAGCGAACAAG |
| OsBZ8-R     | TCATCCTTAGTTGGCACTTCAGTTAC  |
| LEA3-F      | GTGATGTGTACTGATGATGTT       |
| LEA3-R      | CAAATGCGGGCTTTAGG           |
| OsZEP1-F    | CGGTTGGTGATGATGCTATAC       |
| OsZEP1-R    | CTGAATAAGTTGCTTCTGATTGC     |
| Rab16B-F    | AGCTCCAGCTCGTCGTCTGA        |
| Rab16B-R    | GCCAGTGTTCCCCATCATCT        |
| Rab21-F     | CGAGCGCAATAAAAGGAAAAA       |
| Rab21-R     | AGACACGGTCCGTACTGGAGAA      |
