# Supplementary material for: Salt Stress Promotes Abscisic Acid Accumulation to Affect Cell Proliferation and Expansion of Primary Roots in Rice
Source: MDPI journal article supplement (doi:10.3390/ijms221910892), 2021-10-08
Supplement: s1 [file s1]

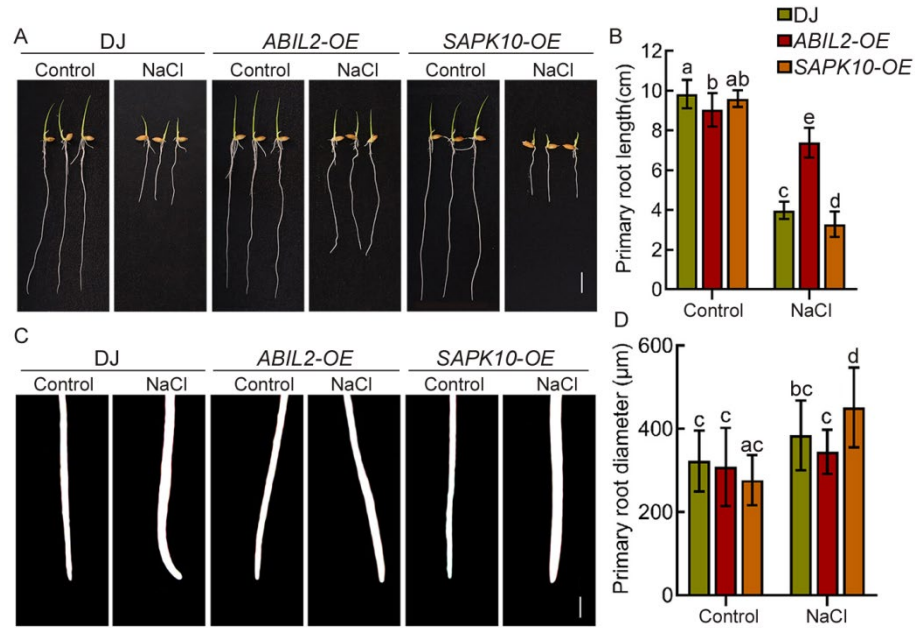

**Figure S1.** Salt inhibits root elongation and promotes root swelling is dependent on ABA signaling. (**A** and **C**) Root phenotypes of Dongjing (DJ), *ABIL2-OE*, and *SAPK10-OE* seedlings treated with or without 100 mM NaCl aqueous solution. Bar = 1cm. (**B** and **D**) Primary root length (**B**) and primary root diameter (**D**) of the seedlings shown in (**A**) and (**C**). Each column is the average of 30 seedlings, and bars indicate  $\pm$  SD. The experiment was repeated at least three times with similar results. Different letters indicate significant differences ( $P < 0.05$ , one-way ANOVA with Tukey's test).

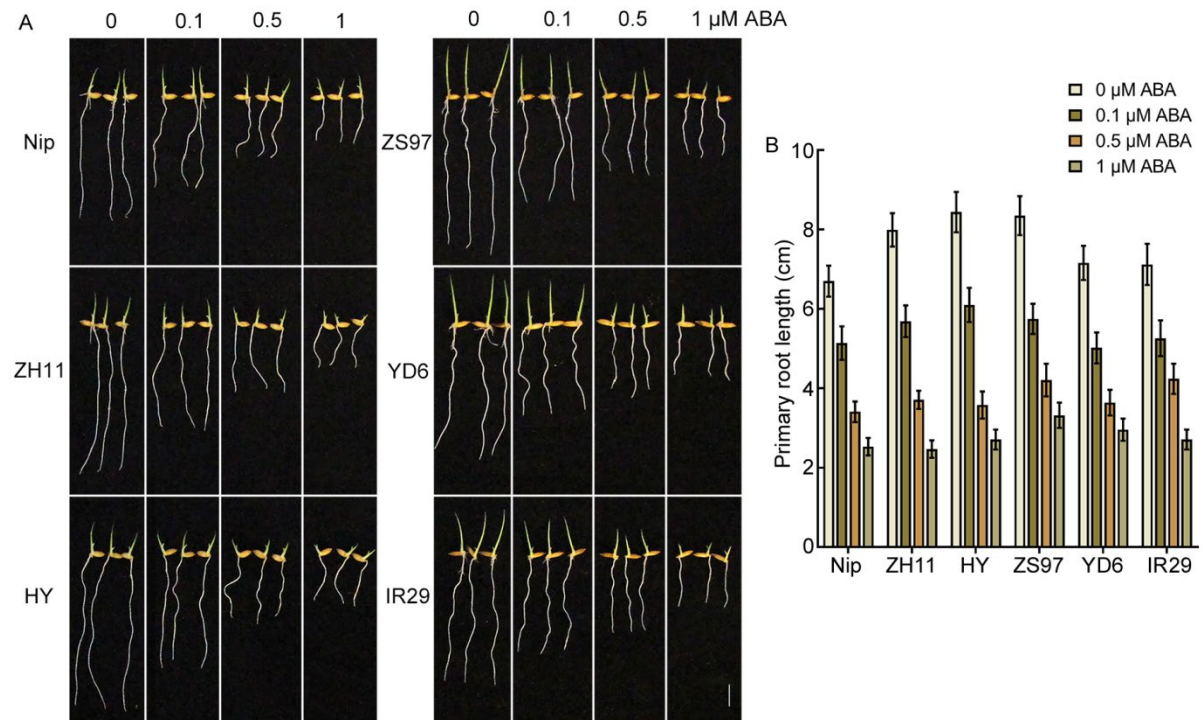

**Figure S2.** ABA inhibits primary root elongation in rice early seedlings. **(A)** Root phenotypes of various *japonica* (Nip-Nipponbare, ZH11-Zhonghua#11, HY-Hwayoung) and *indica* (ZS97-Zhenshan#97, YD6-Yangdao#6, IR29) cultivars treated with 0, 0.1, 0.5 and 1  $\mu\text{M}$  ABA solution. Bar = 1cm. **(B)** Primary root length of the seedlings shown in **(A)**. Each column is the average of 30 seedlings, and bars indicate  $\pm$  SD. The experiment was repeated at least three times with similar results.

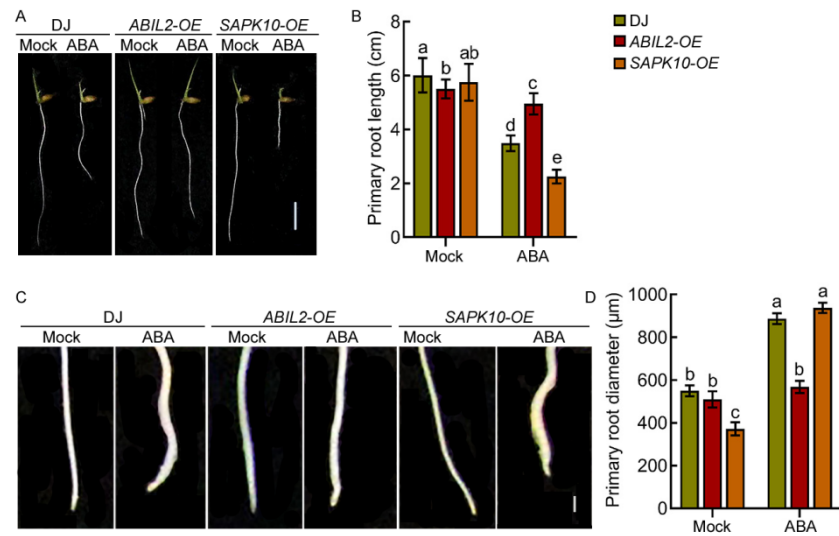

**Figure S3.** ABA-regulated primary root elongation and swelling depends on ABA signaling pathway.

(A and C) Root phenotypes of Dongjing (DJ), *ABIL2-OE* and *SAPK10-OE* seedlings with or without ABA treatment. Rice seedlings were grown under normal conditions for 3 days in the absence (mock) or presence of 1  $\mu$ M ABA. Bar = 1 cm (A) or 1 mm (C). (B and D) Primary root length (B) and primary root diameter (D) shown in (A) and (C). Each column is the average of 30 seedlings, and bars indicate  $\pm$  SD. Three biological replicates were performed, with similar results. Different letters indicate significant differences ( $P < 0.05$ , one-way ANOVA with Tukey's test).
