# Supplementary material for: Salt Stress Promotes Abscisic Acid Accumulation to Affect Cell Proliferation and Expansion of Primary Roots in Rice
Source: Int J Mol Sci. 2021 Oct 8;22(19):10892. doi: 10.3390/ijms221910892 (PMC8509385; doi:10.3390/ijms221910892)
Supplement: Supplementary file 1 [file ijms-22-10892-s001.zip › Supplementary Files/Supplemental Table S1.xlsx]

## Sheet: Sheet1
Supplemental Dataset S1 Up-regulated genes in roots after ABA treatment
GeneID	log2FoldChange	pvalue	padj	Description
Os01g0760900	6.76517	1.41411e-98	3.99274e-94	probable protein abil5
Os07g0529600	5.85956	2.4529e-94	3.46288e-90	thiazole biosynthetic enzyme thi4 family
Os01g0705200	6.06058	1.18517e-81	1.11544e-77	-
Os11g0498600	5.01871	2.9552e-75	2.086e-71	hva22-like protein e
Os06g0141600	5.89836	5.89834e-64	2.37914e-60	early nodulin
Os06g0168700	8.60224	3.89303e-62	1.374e-58	36.4 kDa proline-rich protein
Os03g0322900	11.1489	1.77379e-49	4.17358e-46	late embryogenesis abundant protein 1-like
Os03g0296200	5.1286	1.81894e-47	3.50656e-44	-
Os10g0178000	11.0605	1.86288e-47	3.50656e-44	cortical cell-delineating protein
Os10g0548100	7.53256	2.10323e-46	3.71154e-43	dm280 protein
Os09g0325700	4.84829	7.42881e-45	1.16529e-41	probable protein phosphatase 2c 68
Os01g0881900	3.72783	1.19309e-43	1.77299e-40	F-box protein SKP2A
Os06g0697000	4.27751	2.23494e-41	3.15518e-38	probable xyloglucan endotransglucosylase hydrolase protein 25
Os04g0415800	6.5196	3.65815e-40	4.62681e-37	-
Os08g0476300	3.92115	2.28781e-39	2.58385e-36	Inactive hydroxysteroid dehydrogenase-like protein 1
Os08g0480200	6.70935	6.10038e-38	6.62477e-35	probable 2-oxoglutarate fe -dependent dioxygenase
Os06g0142200	3.22201	2.38602e-37	2.40604e-34	early nodulin
Os02g0669100	3.04867	8.68057e-37	8.16987e-34	dehydrin cor410
Os01g0814100	3.4703	3.74178e-36	3.30153e-33	non-specific lipid transfer protein gpi-anchored 2-like
Os05g0361700	3.50186	6.79928e-35	5.6464e-32	ethylene-responsive transcription factor erf071-like
Os11g0454000	10.3471	2.13038e-33	1.62571e-30	dehydrin rab16b-like
Os06g0142400	3.41449	4.25914e-33	3.16465e-30	early nodulin
Os09g0445600	3.5767	1.7537e-32	1.2077e-29	oxidoreductase transition metal ion-binding protein
Os08g0475500	5.60115	4.27436e-32	2.80667e-29	-
Os01g0858350	2.92666	9.77317e-31	5.74886e-28	cytochrome p450 94c1
Os07g0658600	3.63134	3.14004e-30	1.73841e-27	protein aspartic protease in guard cell 2
Os05g0195200	4.08724	6.67877e-30	3.62644e-27	nucleic acid binding protein
Os09g0558850	6.94873	1.55461e-29	8.28196e-27	zinc finger protein 2
Os10g0459700	2.74734	3.77537e-29	1.97403e-26	xyloglucan galactosyltransferase katamari1 homolog
Os12g0147200	4.98028	1.71508e-28	8.80459e-26	plant t22k18-16
Os03g0325600	4.91084	1.96744e-28	9.91976e-26	wuschel-related homeobox 6-like
Os05g0465800	5.11661	2.38573e-28	1.18177e-25	respiratory burst oxidase homolog protein h
Os01g0644200	10.5624	8.4868e-28	4.06144e-25	uncharacterized protein loc4325912
Os08g0465800	5.35382	7.59192e-27	3.51406e-24	glutamate decarboxylase
Os02g0658000	4.4835	7.73614e-27	3.52306e-24	-
Os04g0244800	2.42606	2.41782e-25	1.01891e-22	heavy metal-associated isoprenylated plant protein 26-like
Os11g0454200	9.74084	7.9913e-25	3.13381e-22	dehydrin dhn3-like
Os03g0336400	6.24183	2.5186e-24	9.74146e-22	expa6_orysj ame: full=expansin-a6 ame: full=alpha-expansin-6 ame: full= 6 ame: full= 6 ame: full= flags: precursor
Os06g0142350	2.78032	3.19176e-24	1.21783e-21	early nodulin 93
Os06g0114400	5.18588	4.0423e-24	1.52179e-21	pentatricopeptide repeat-containing protein chloroplastic-like
Os10g0521000	2.31205	3.66327e-23	1.2929e-20	probable trehalase
Os05g0349800	9.43419	5.94409e-23	2.04672e-20	early-methionine-labelled polypeptide
Os07g0592000	2.81975	3.05163e-22	1.00189e-19	-
Os09g0379600	6.86306	5.27407e-22	1.65459e-19	homeobox-leucine zipper protein hox25
Os03g0805766	6.53848	5.55662e-22	1.72408e-19	protochlorophyllide-dependent translocon component chloroplastic
Os11g0547000	2.71607	2.90896e-21	8.46747e-19	adagio-like protein 3 isoform x1
Os06g0181700	5.28612	3.22397e-21	9.28864e-19	ethylene-responsive transcription factor erf003
Os04g0564700	2.2853	1.0453e-20	2.92218e-18	uncharacterized protein loc9271804
Os02g0332800	2.38928	1.98846e-20	5.45089e-18	-
Os10g0576600	2.00482	1.6387e-19	4.28415e-17	uncharacterized protein loc4349493
Os01g0256500	2.11509	3.17705e-19	7.9502e-17	zinc inducible protein
Os08g0472800	3.25373	3.18177e-19	7.9502e-17	aba 8 -hydroxylase
Os03g0820500	3.16419	9.55501e-19	2.28632e-16	actin depolymerization factor-like protein
Os01g0846300	2.07563	1.16789e-18	2.72525e-16	probable protein phosphatase 2c 9
Os10g0492900	4.35915	1.34229e-17	2.89309e-15	alpha-galactosidase 1-like
Os02g0700300	2.28352	2.01676e-17	4.31389e-15	myb family transcription factor apl
Os09g0127700	8.67198	2.20948e-17	4.69058e-15	uncharacterized protein loc4346439
Os06g0651200	4.74339	3.00938e-17	6.29406e-15	-
Os03g0259100	1.88446	3.07023e-17	6.37411e-15	chemocyanin partial
Os08g0357700	2.66755	3.98631e-17	8.21558e-15	-
Os04g0635400	2.35867	6.97236e-17	1.3962e-14	-
Os05g0373900	4.61234	8.56472e-17	1.69108e-14	eukaryotic peptide chain release factor subunit 1-3
Os08g0178500	4.11396	1.69895e-16	3.26326e-14	-
Os02g0644000	2.40563	2.28771e-16	4.33523e-14	vacuolar-processing enzyme beta-isozyme 1-like
Os05g0560200	3.00538	3.32847e-16	6.18286e-14	transcription factor hbp-1b
Os05g0470900	3.43982	3.38025e-16	6.23801e-14	-
Os08g0242400	3.93027	3.98944e-16	7.3144e-14	wuschel-related homeobox 10
Os01g0858200	3.99465	4.06658e-16	7.37554e-14	pre-mrna-splicing factor atp-dependent rna helicase dhx16 isoform x1
Os06g0142300	2.48895	7.74531e-16	1.38411e-13	early nodulin
Os02g0205200	1.91898	2.43477e-15	4.14132e-13	uncharacterized protein loc4328673
Os06g0246500	3.56949	2.64633e-15	4.4742e-13	pyruvate dehydrogenase e1 component subunit alpha- mitochondrial
Os06g0109100	1.7086	3.88675e-15	6.41769e-13	e3 ubiquitin-protein ligase rha1b-like
Os03g0415351	2.90141	5.31839e-15	8.63016e-13	-
Os09g0378700	2.55754	6.34335e-15	1.01764e-12	u-box domain-containing protein 19
Os10g0498000	2.02758	6.78324e-15	1.06997e-12	bifunctional epoxide hydrolase 2-like
Os07g0683600	3.20548	7.93238e-15	1.24428e-12	-
Os09g0364800	3.44141	9.51654e-15	1.47637e-12	heavy metal-associated isoprenylated plant protein 26-like
Os01g0583100	1.64631	1.13911e-14	1.74798e-12	probable protein phosphatase 2c 6
Os09g0555500	4.94501	1.16999e-14	1.78566e-12	phytoene synthase chloroplastic
Os06g0133600	2.00458	1.54217e-14	2.30387e-12	protein exordium-like 3
Os12g0616800	3.33733	1.61092e-14	2.39391e-12	uncharacterized protein loc4352802
Os08g0408500	1.64367	2.13695e-14	3.159e-12	ap2-domain dre binding factor dbf1
Os02g0505500	3.85393	2.33256e-14	3.43019e-12	-
Os01g0919100	6.64569	2.9202e-14	4.2283e-12	protein detoxification 42-like
Os06g0524400	1.73987	3.11653e-14	4.48955e-12	protein trichome birefringence-like 24
Os04g0589800	2.44807	3.30472e-14	4.73649e-12	uncharacterized protein loc4336815
Os06g0623700	4.30072	4.63859e-14	6.51595e-12	protein strictosidine synthase-like 10-like
Os04g0662400	2.19787	6.17481e-14	8.63097e-12	indole-3-acetic acid-induced protein arg7
Os12g0156200	2.96261	7.73959e-14	1.07121e-11	retrotransposon unclassified
Os04g0522100	2.05611	9.76458e-14	1.32549e-11	low-molecular-weight cysteine-rich protein lcr69 precursor
Os02g0686800	3.26029	1.04922e-13	1.41745e-11	-
Os01g0135700	2.52849	1.06735e-13	1.43508e-11	calmodulin-related protein touch-induced
Os03g0388900	2.65308	1.29177e-13	1.72858e-11	metacaspase family protein
Os01g0848200	2.59446	1.35313e-13	1.80216e-11	delta-1-pyrroline-5-carboxylate synthase
Os06g0668200	2.16121	1.58876e-13	2.07679e-11	phosphoglycerate cytosolic
Os10g0524600	1.80917	2.58913e-13	3.3534e-11	subtilisin-like protease
Os02g0766700	1.61568	3.84513e-13	4.89042e-11	aba responsive element binding factor 1
Os04g0483000	1.73462	4.13568e-13	5.23636e-11	bag family molecular chaperone regulator 1-like
Os03g0280400	4.19795	4.32333e-13	5.44952e-11	-
Os02g0158900	3.4265	5.20791e-13	6.53535e-11	-
Os04g0635500	1.86742	7.12932e-13	8.79024e-11	-
Os01g0855200	2.17737	7.80061e-13	9.5761e-11	uncharacterized protein loc4324827
Os03g0607200	5.3686	9.81646e-13	1.19986e-10	Snakin-1
Os05g0115100	2.14275	1.08698e-12	1.32288e-10	unknown protein [Oryza sativa Japonica Group]
Os04g0275950	2.18995	1.28175e-12	1.53349e-10	-
Os06g0683100	2.67254	1.66292e-12	1.95636e-10	dihydroflavonol-4-reductase isoform x2
Os01g0881300	1.53404	2.14583e-12	2.50361e-10	bidirectional sugar transporter sweet1a
Os01g0329300	2.77701	2.309e-12	2.68291e-10	polygalacturonase at1g48100-like
Os08g0431900	2.51847	2.74064e-12	3.1077e-10	mads-box transcription factor 23-like
Os01g0849000	2.65808	4.01049e-12	4.47574e-10	-
Os08g0560000	2.60743	4.97637e-12	5.48859e-10	2 -deoxymugineic-acid 2 -dioxygenase-like
Os04g0405300	1.85825	7.56735e-12	8.03249e-10	momilactone a synthase-like
Os04g0167875	7.62053	9.06633e-12	9.48103e-10	probable protein phosphatase 2c 37
Os01g0656200	2.63405	9.42994e-12	9.82488e-10	probable protein phosphatase 2c 8
Os04g0537100	2.89112	1.00412e-11	1.04233e-09	saur11 - auxin-responsive saur family member
Os02g0566400	2.49647	1.09123e-11	1.1286e-09	uncharacterized protein loc4329709
Os10g0173000	8.03586	1.22101e-11	1.25364e-09	uncharacterized protein loc4348192
Os10g0376900	1.87091	1.36109e-11	1.38738e-09	transcription factor bhlh94-like
Os01g0975900	1.47624	1.55307e-11	1.57172e-09	probable aquaporin tip1-2
Os04g0579200	1.95646	1.70998e-11	1.7182e-09	e3 ubiquitin-protein ligase rha1b-like
Os04g0386700	4.57988	2.28152e-11	2.27628e-09	uncharacterized protein loc101292083
Os02g0823400	1.59062	2.35879e-11	2.34508e-09	caffeic acid 3-o-methyltransferase
Os08g0452900	2.40369	2.37431e-11	2.35223e-09	chaperone isoform x2
Os12g0106000	1.78874	2.65681e-11	2.6229e-09	ferritin- chloroplastic
Os05g0412800	1.57391	3.35377e-11	3.2653e-09	glutathione transferase gst 23-like
Os01g0124401	2.00879	4.12142e-11	3.95811e-09	bowman birk trypsin inhibitor
Os01g0182600	1.46648	5.96936e-11	5.65587e-09	protein gigantea
Os01g0935600	1.81196	6.30938e-11	5.95804e-09	spermatogenesis-associated protein 20 isoform x1
Os02g0219800	1.78643	7.70803e-11	7.13562e-09	senescence-associated protein 5
Os02g0756100	2.57766	8.99972e-11	8.25023e-09	epidermal patterning factor-like protein 1
Os03g0327600	1.5992	9.33483e-11	8.52974e-09	-
Os03g0306700	2.75906	9.9219e-11	9.03693e-09	ocs element-binding factor 1
Os01g0842600	1.91406	1.01102e-10	9.17884e-09	atp-dependent zinc metalloprotease ftsh mitochondrial
Os01g0733200	4.58643	1.10043e-10	9.95851e-09	heat stress transcription factor c-1b-like
Os06g0696600	1.90329	1.40383e-10	1.25832e-08	probable xyloglucan endotransglucosylase hydrolase protein 23
Os05g0542500	2.00419	1.41691e-10	1.26204e-08	Late embryogenesis abundant protein, group 3
Os02g0751900	2.21353	1.86143e-10	1.62717e-08	type i inositol -trisphosphate 5-phosphatase cvp2-like
Os02g0537000	5.12881	1.887e-10	1.64443e-08	invertase inhibitor
Os09g0532400	1.53571	2.3033e-10	1.96477e-08	two-component response regulator-like prr95
Os11g0451700	9.09628	2.37855e-10	2.02284e-08	dehydrin partial
Os10g0175700	4.89896	2.69526e-10	2.2853e-08	wall-associated receptor kinase 1-like
Os06g0227500	5.05746	3.54592e-10	2.95336e-08	glutathione s-transferase u10-like
Os01g0228500	7.79654	3.5626e-10	2.95853e-08	uncharacterized protein loc103968920
Os09g0272000	2.00419	4.08921e-10	3.38589e-08	pou class transcription factor 1
Os01g0719300	2.62607	4.14588e-10	3.42278e-08	probable sulfate transporter
Os02g0740500	2.10784	4.42833e-10	3.6347e-08	uncharacterized protein loc4330678
Os02g0687200	2.14588	4.85831e-10	3.95315e-08	-
Os01g0312500	1.7606	4.88308e-10	3.96189e-08	pectinesterase 3
Os03g0265900	2.71532	5.27647e-10	4.2688e-08	uncharacterized protein loc103723674 isoform x1
Os04g0266900	1.69196	5.76729e-10	4.62612e-08	chloroplastic
Os02g0592833	2.16511	6.5603e-10	5.20309e-08	-
Os01g0287600	1.58631	7.97635e-10	6.23857e-08	chitinase 10
Os05g0122700	7.38872	8.1287e-10	6.34016e-08	low temperature-induced protein
Os12g0567500	2.32979	8.43977e-10	6.56465e-08	probable lrr receptor-like serine threonine-protein kinase at1g51810
Os06g0220000	2.60044	8.52458e-10	6.61241e-08	-
Os01g0316600	2.50818	8.79424e-10	6.80289e-08	serine arginine-rich-splicing factor sr34-like isoform x1
Os07g0448600	2.17835	9.51028e-10	7.33669e-08	plasma membrane integral protein
Os01g0928000	2.90137	1.02861e-09	7.87822e-08	inducer of cbf expression partial
Os03g0839700	3.02303	1.0296e-09	7.87822e-08	retrotransposon line subclass
Os07g0178600	2.00721	1.26247e-09	9.48027e-08	heat stress transcription factor a-2b-like
Os11g0138600	2.9327	1.5231e-09	1.12874e-07	phosphoglycerate mutase-like protein 4
Os05g0474700	2.23048	1.53361e-09	1.13355e-07	-
Os01g0183300	3.08788	1.5415e-09	1.13641e-07	type i inositol- -trisphosphate 5-phosphatase cvp2
Os06g0211200	1.87192	1.66423e-09	1.22368e-07	abscisic acid-insensitive 5-like protein 5
Os03g0861400	1.2886	1.71799e-09	1.25667e-07	nucleolar protein 58-like
Os03g0144500	1.43279	1.76351e-09	1.28332e-07	xyloglucan galactosyltransferase katamari1 homolog
Os04g0179700	7.23352	1.79069e-09	1.29974e-07	syn-pimara- -diene synthase
Os01g0658900	1.77917	1.80828e-09	1.30915e-07	g-box-binding factor 3-like
Os03g0111300	7.36674	3.02647e-09	2.15269e-07	non-specific lipid-transfer protein 2p-like
Os01g0731100	7.34276	3.04227e-09	2.15286e-07	Pathogen-related protein
Os03g0305600	7.17225	3.04229e-09	2.15286e-07	outer envelope pore protein 16- chloroplastic
Os06g0179200	1.32306	3.40994e-09	2.37727e-07	protein nuclear fusion defective 4
Os08g0485500	2.27085	3.44649e-09	2.39684e-07	type 1a plasma membrane receptor-like
Os07g0668300	4.77094	4.19249e-09	2.88719e-07	gdsl esterase lipase at2g23540-like
Os02g0274900	1.24791	4.89751e-09	3.34012e-07	probable plastidic glucose transporter 2
Os05g0408900	1.42982	5.2271e-09	3.54777e-07	1-deoxy-d-xylulose-5-phosphate synthase chloroplastic
Os01g0743200	1.34422	5.30014e-09	3.58872e-07	probable pectinesterase 53
Os04g0173800	3.95387	5.59663e-09	3.7804e-07	agglutinin isolectin 3-like
Os03g0119300	1.78976	6.07041e-09	4.06156e-07	subtilisin-like protease
Os03g0103300	4.08829	6.81613e-09	4.52832e-07	14 kDa proline-rich protein DC2.15
Os10g0491000	3.53341	7.29686e-09	4.81371e-07	-
Os01g0315700	2.96833	1.1601e-08	7.44444e-07	caffeoylshikimate esterase-like
Os02g0755900	2.04171	1.19834e-08	7.63772e-07	cytokinin-o-glucosyltransferase 2
Os07g0147600	1.2557	1.24337e-08	7.90689e-07	probable receptor-like protein kinase at1g30570
Os04g0581800	1.81876	1.34473e-08	8.53223e-07	copper transport protein atx1
Os03g0133100	7.58653	1.35088e-08	8.55203e-07	-
Os04g0218400	1.31541	1.72161e-08	1.07169e-06	probable methyltransferase pmt21
Os12g0573600	3.70285	1.83378e-08	1.12804e-06	-
Os07g0633200	1.57921	1.84203e-08	1.13065e-06	loc100285628 isoform x1
Os12g0638300	3.08029	2.13808e-08	1.30105e-06	protein nrt1 ptr family -like
Os11g0106700	1.56922	2.25801e-08	1.37062e-06	ferritin chloroplast expressed
Os03g0283200	2.02811	2.26211e-08	1.37062e-06	protein in2-1
Os08g0359100	1.34129	2.30244e-08	1.39206e-06	lipid phosphate phosphatase 2-like
Os05g0494600	4.93912	2.31673e-08	1.39771e-06	eid1-like f-box protein 3
Os05g0418100	1.90535	2.41392e-08	1.45015e-06	mlo-like protein 1
Os10g0561800	1.60886	2.45617e-08	1.4724e-06	homeobox-leucine zipper protein hat3-like
Os11g0211800	1.26136	2.66508e-08	1.59088e-06	uncharacterized protein tcm_032689
Os03g0439500	2.58634	2.86064e-08	1.69947e-06	protein srg1-like
Os03g0557900	3.08298	3.14561e-08	1.85808e-06	uncharacterized protein loc9271412
Os01g0121600	1.8905	3.19453e-08	1.87911e-06	uncharacterized protein loc4326044
Os06g0613600	3.15561	3.36256e-08	1.96975e-06	cytochrome p450 93a3-like
Os09g0109600	4.44603	3.71962e-08	2.16543e-06	-
Os04g0373400	1.65489	3.74626e-08	2.17645e-06	protein detoxification 16-like
Os07g0534700	1.3276	4.23452e-08	2.41539e-06	cysteine-rich receptor-like protein kinase 10
Os04g0520700	2.0085	4.3581e-08	2.48087e-06	uncharacterized protein loc4336422
Os11g0634200	1.53155	5.12932e-08	2.87354e-06	uncharacterized protein loc102705026
Os05g0448675	2.29417	5.21644e-08	2.91656e-06	ethylene-responsive transcription factor erf094-like
Os08g0112700	1.40423	5.28423e-08	2.9428e-06	mads-box transcription factor 26
Os05g0580000	1.1738	5.83698e-08	3.23151e-06	adp-glucose pyrophosphorylase large subunit
Os04g0439300	1.48104	5.90473e-08	3.26263e-06	ddt domain-containing protein ddb_g0282237-like
Os02g0747900	1.32403	6.01732e-08	3.31834e-06	transcription factor ili5
Os03g0263000	1.69442	6.0881e-08	3.35083e-06	ethylene-responsive transcription factor erf014-like
Os01g0652100	1.50533	6.32398e-08	3.46042e-06	protein trichome birefringence-like 38
Os06g0698300	1.88004	6.35851e-08	3.47258e-06	probable protein phosphatase 2c 59
Os03g0142600	1.99024	6.71143e-08	3.6512e-06	myb transcription partial
Os07g0122000	2.22035	7.84903e-08	4.17846e-06	uncharacterized protein loc4342282 isoform x1
Os03g0305400	2.6811	8.20363e-08	4.33763e-06	universal stress protein a-like protein
Os10g0554800	1.4723	8.70845e-08	4.58737e-06	14 kDa proline-rich protein DC2.15
Os03g0805800	5.6938	9.22405e-08	4.84993e-06	protochlorophyllide-dependent translocon component chloroplastic
Os01g0702450	1.8422	1.0415e-07	5.41559e-06	chaperone protein dnaj 10
Os06g0574100	1.16592	1.22684e-07	6.26397e-06	#NAME?
Os02g0579000	1.53998	1.23522e-07	6.29541e-06	nac domain-containing protein 92-like isoform x1
Os03g0145900	2.63357	1.24091e-07	6.31299e-06	chy zinc finger family expressed
Os01g0187900	1.28714	1.31957e-07	6.7011e-06	transcription factor myb1r1-like
Os10g0470100	3.14209	1.43173e-07	7.21773e-06	caax box protein 1-like
Os10g0390000	2.02555	1.46302e-07	7.33424e-06	uncharacterized protein loc100277026 isoform x1
Os04g0167900	6.75431	1.46366e-07	7.33424e-06	probable protein phosphatase 2c 37
Os04g0494600	1.13585	1.48278e-07	7.39686e-06	-
Os01g0214500	4.43644	1.51297e-07	7.52091e-06	uncharacterized protein loc4325256
Os12g0552400	2.07432	1.53158e-07	7.57849e-06	fiber protein fb19
Os11g0701800	3.58896	1.53529e-07	7.57849e-06	xylanase inhibitor protein 1-like
Os07g0209100	2.44514	1.71338e-07	8.41344e-06	probable galactinol--sucrose galactosyltransferase 2
Os05g0526700	2.54466	1.7581e-07	8.61803e-06	harpin-induced protein
Os06g0212400	2.15749	1.88731e-07	9.21942e-06	galactoside 2-alpha-l-fucosyltransferase-like
Os02g0691500	2.39327	1.96611e-07	9.53835e-06	transcription factor bhlh96
Os05g0227600	1.67916	2.01473e-07	9.72408e-06	proline-rich protein
Os07g0640900	1.41211	2.10571e-07	1.01286e-05	heat shock transcription factor -like protein
Os01g0720500	1.29451	2.33257e-07	1.11063e-05	chlorophyll a-b binding protein of lhcii type 1-like
Os12g0245700	1.93795	2.47927e-07	1.17651e-05	uncharacterized protein loc9270531
Os05g0457200	4.19202	2.78114e-07	1.30876e-05	probable protein phosphatase 2c 9
Os01g0827300	3.37999	3.0216e-07	1.4125e-05	laccase-3
Os09g0456200	1.48717	3.11085e-07	1.44491e-05	bzip transcription factor trab1-like
Os01g0736100	1.51105	3.1114e-07	1.44491e-05	anthocyanidin -o-glucosyltransferase
Os07g0510900	1.30686	3.45456e-07	1.57831e-05	l-ascorbate oxidase homolog
Os08g0442400	5.40172	3.50901e-07	1.60059e-05	ap2-like ethylene-responsive transcription factor at1g16060
Os09g0419100	1.21862	3.57962e-07	1.62754e-05	-
Os01g0615500	2.05499	3.7067e-07	1.67533e-05	abc transporter g family member 10
Os08g0253800	1.08769	3.8696e-07	1.74255e-05	probable xyloglucan glycosyltransferase 3
Os10g0155700	1.89888	3.9036e-07	1.75507e-05	leucine-rich repeat receptor-like protein kinase pepr2
Os01g0190000	1.78391	3.95306e-07	1.77166e-05	clavaminate synthase-like protein at3g21360
Os02g0508100	1.28187	4.67167e-07	2.06747e-05	uncharacterized protein loc4329444
Os08g0409100	1.37316	4.84971e-07	2.13622e-05	probable trehalose-phosphate phosphatase 6
Os01g0773400	1.09636	4.86918e-07	2.14145e-05	-
Os08g0526100	2.02678	5.02241e-07	2.20541e-05	udp-glucuronate 4-epimerase 6-like
Os01g0546400	1.87645	5.2917e-07	2.30929e-05	wat1-related protein at5g64700-like
Os03g0454300	1.23241	5.55792e-07	2.41427e-05	Os03g0454300 [Oryza sativa Japonica Group]
Os02g0121300	1.09805	5.58694e-07	2.41944e-05	cyclophilin 1
Os03g0634000	1.87026	5.69974e-07	2.45698e-05	sec-independent protein translocase protein chloroplastic-like
Os01g0559000	1.09127	5.83063e-07	2.50957e-05	pith domain-containing protein 1
Os04g0508500	2.03443	6.05542e-07	2.59446e-05	myb-related protein 340
Os01g0618100	1.12635	6.13203e-07	2.61538e-05	Auxin-induced protein PCNT115
Os10g0138300	6.74975	6.15498e-07	2.61726e-05	-
Os01g0846400	2.62154	6.61358e-07	2.78708e-05	-
Os10g0150600	2.54972	6.93887e-07	2.91546e-05	-
Os01g0633400	2.24353	7.47464e-07	3.12662e-05	snf1-related protein kinase regulatory subunit gamma-1-like
Os07g0516600	2.7901	7.63826e-07	3.1893e-05	protein detoxification 40
Os04g0482900	1.60022	7.9842e-07	3.30979e-05	uncharacterized protein loc102703482
Os06g0653200	1.36411	8.05414e-07	3.32956e-05	sequence-specific dna binding transcription
Os08g0452500	1.40345	8.69148e-07	3.57732e-05	saur33 - auxin-responsive saur family member
Os05g0102000	2.94115	8.78118e-07	3.5985e-05	jasmonate o-methyltransferase
Os08g0463500	2.78961	8.94686e-07	3.66108e-05	zinc finger protein 8-like
Os02g0754400	5.10775	9.69964e-07	3.96338e-05	transcription factor myb39
Os02g0602000	1.40886	1.04074e-06	4.2342e-05	uncharacterized protein loc100500158 isoform x1
Os04g0600000	2.07021	1.08377e-06	4.39026e-05	myb family transcription factor apl-like
Os01g0585100	1.07057	1.08929e-06	4.40633e-05	uncharacterized membrane protein
Os05g0215300	1.47443	1.1639e-06	4.66802e-05	hydroquinone glucosyltransferase-like
Os12g0594950	1.90234	1.17025e-06	4.68681e-05	-
Os03g0758100	1.13046	1.19912e-06	4.78208e-05	alpha- glucan phosphorylase l chloroplastic amyloplastic
Os11g0181200	4.33897	1.20373e-06	4.78946e-05	Os11g0181200 [Oryza sativa Japonica Group]
Os09g0418000	1.33041	1.21382e-06	4.81352e-05	cbl-interacting serine threonine-protein kinase 5-like
Os01g0802600	2.90852	1.24263e-06	4.91394e-05	eid1-like f-box protein 3
Os08g0444440	6.52089	1.24609e-06	4.92076e-05	-
Os03g0757000	1.38041	1.27669e-06	5.02751e-05	glucosyl expressed
Os11g0546900	1.08779	1.30492e-06	5.12441e-05	14-3-3-like protein
Os08g0160300	1.24305	1.36283e-06	5.32959e-05	probable transcription factor kan2 isoform x2
Os08g0422500	1.85447	1.37762e-06	5.37254e-05	Os08g0422500, partial [Oryza sativa Japonica Group]
Os04g0461300	1.42879	1.41782e-06	5.52167e-05	mads-box transcription factor 27
Os01g0844500	1.34127	1.47384e-06	5.71617e-05	aspartic proteinase pcs1-like
Os06g0662550	3.88718	1.51085e-06	5.83568e-05	partial
Os03g0159400	1.88755	1.55045e-06	5.98048e-05	transcription repressor ofp12
Os06g0705000	1.35939	1.63099e-06	6.28256e-05	glycosyltransferase family 64 protein c4
Os04g0572100	3.66018	1.66307e-06	6.37134e-05	epstein-barr virus ebna-1-like protein
Os05g0502000	2.04299	1.75857e-06	6.70085e-05	cyclic nucleotide-gated ion channel 4-like
Os01g0701350	3.23627	1.77697e-06	6.74366e-05	cytochrome p450 711a1
Os05g0510100	1.74895	1.89924e-06	7.15957e-05	protein lurp-one-related 5-like
Os04g0493100	1.57284	1.93237e-06	7.27472e-05	transcription factor bhlh113-like
Os10g0150400	3.05122	1.9987e-06	7.51444e-05	-
Os01g0826800	1.15743	2.05508e-06	7.69566e-05	-
Os10g0524000	2.00086	2.19628e-06	8.18798e-05	-
Os11g0644600	1.93481	2.39284e-06	8.83161e-05	-
Os01g0281600	1.26382	2.40692e-06	8.87199e-05	blue copper
Os01g0728700	6.32595	2.48832e-06	9.1459e-05	uncharacterized protein loc102700284
Os03g0596700	6.32596	2.49095e-06	9.1459e-05	uncharacterized protein loc104581998
Os01g0122000	6.99662	2.58765e-06	9.46402e-05	e3 ubiquitin-protein ligase sina-like 10
Os02g0581200	1.4709	2.87731e-06	0.000103889	uncharacterized protein loc4329784
Os07g0142600	4.60641	2.95401e-06	0.000106011	-
Os03g0675500	1.93196	2.95486e-06	0.000106011	-
Os01g0332200	3.0515	3.06859e-06	0.000109534	gibberellin 2-oxidase
Os08g0277200	6.46004	3.08037e-06	0.000109771	cinnamoyl- reductase
Os02g0297200	1.89427	3.08299e-06	0.000109771	uncharacterized protein loc104584851
Os10g0176300	1.42042	3.10589e-06	0.000110308	uncharacterized protein loc103638529
Os01g0314800	1.17142	3.13651e-06	0.000111255	late embryogenesis abundant protein lea5-d-like
Os10g0420400	2.29287	3.38315e-06	0.000119255	sulfate transporter -like
Os10g0479001	1.05431	3.57397e-06	0.000125668	-
Os01g0761000	1.39012	3.76419e-06	0.000132027	protein curvature thylakoid chloroplastic
Os11g0177400	1.46207	3.86915e-06	0.00013461	abc transporter g family member 25
Os08g0375400	4.47791	3.87121e-06	0.00013461	disease resistance response protein
Os04g0483200	1.17601	4.15103e-06	0.000143633	uncharacterized membrane protein at3g27390-like
Os04g0604800	1.03844	4.26526e-06	0.000147224	xyloglucan endotransglucosylase hydrolase protein 24-like
Os06g0686900	6.92113	4.60495e-06	0.00015741	uncharacterized protein tcm_028732
Os02g0291000	1.31346	4.78853e-06	0.00016329	calcineurin b-like protein 7
Os03g0415500	2.07119	4.84439e-06	0.000164797	mitochondrial import inner membrane translocase subunit tim17-2-like
Os06g0495500	1.28229	4.92108e-06	0.000167003	protein detoxification 16
Os07g0602900	1.04873	5.04566e-06	0.000170005	rna-binding protein
Os07g0412100	1.11946	5.05977e-06	0.000170277	granule-bound starch synthase ii
Os09g0437100	1.42529	5.14091e-06	0.000172596	saur37 - auxin-responsive saur family member
Os01g0966900	2.0685	5.32655e-06	0.000177982	polyol transporter 5
Os01g0710100	1.69823	5.45515e-06	0.000181849	uncharacterized protein loc4327827
Os03g0794000	2.41721	5.88628e-06	0.000194178	non-specific lipid transfer protein gpi-anchored 2-like
Os02g0566000	2.1173	5.8869e-06	0.000194178	stem-specific protein tsjt1
Os07g0618400	1.71841	6.02596e-06	0.000198302	leucine-rich repeat transmembrane protein kinase 2
Os06g0683000	1.21156	6.14802e-06	0.000201848	uncharacterized protein loc104604941
Os09g0466300	2.15713	6.46443e-06	0.000210766	glabra2 expression modulator
Os01g0962100	2.3708	6.55865e-06	0.000213591	uncharacterized protein loc4324548
Os05g0457000	3.85185	6.77668e-06	0.000219678	uncharacterized protein loc107278687
Os05g0181300	1.46502	6.81544e-06	0.000220681	uncharacterized protein loc103718967
Os01g0729400	2.91379	7.40831e-06	0.000238239	-
Os12g0204500	1.71497	7.48029e-06	0.00024028	glucuronoxylan 4-o-methyltransferase 1
Os09g0455300	2.49742	7.68212e-06	0.000246203	transcription factor hec2-like
Os01g0779800	1.18552	7.99515e-06	0.000255655	serine arginine repetitive matrix protein 1-like
Os08g0167000	1.203	8.37131e-06	0.000266476	abc transporter g family member 14
Os09g0459200	1.97318	8.56689e-06	0.000272088	-
Os01g0102000	1.06258	8.64256e-06	0.000274183	non-specific phospholipase c6
Os04g0662200	1.29539	8.84713e-06	0.00027973	indole-3-acetic acid-induced protein arg7
Os07g0475400	1.02351	9.07476e-06	0.000286286	expansin-like a1
Os09g0461500	1.28175	9.17106e-06	0.000288679	probable carboxylesterase 2
Os02g0132500	1.01071	9.40422e-06	0.000295688	ocs element-binding factor 1
Os04g0105100	1.77386	9.60295e-06	0.000300847	protein binding protein
Os03g0386000	1.51859	9.62157e-06	0.000300847	Uncharacterized WD repeat-containing protein C2A9.03
Os03g0793800	2.54843	9.68052e-06	0.000302021	non-specific lipid-transfer protein at2g13820 isoform x1
Os10g0150700	3.95552	9.71657e-06	0.000302812	-
Os05g0595000	1.79922	9.92262e-06	0.000307874	Pathogenesis-related protein 1A
Os07g0523100	2.24849	9.98513e-06	0.000309404	60s ribosomal protein l44
Os07g0627000	1.00247	9.99386e-06	0.000309404	4-alpha-glucanotransferase chloroplastic amyloplastic
Os09g0572700	2.73721	1.03497e-05	0.000319371	blue copper-binding
Os06g0235800	1.44415	1.04291e-05	0.00032147	pre-mrna-splicing factor syf1
Os05g0421450	2.84473	1.04679e-05	0.000322313	nac domain-containing protein 48-like
Os03g0300600	1.62244	1.06025e-05	0.000325066	DnaJ homolog subfamily B member 6-A
Os08g0520900	1.18758	1.06149e-05	0.000325066	isoamylase
Os01g0786500	1.25462	1.06458e-05	0.000325661	blue copper
Os05g0435300	4.48617	1.07311e-05	0.000327913	uncharacterized protein loc4338895
Os05g0466100	3.64057	1.07935e-05	0.000329381	uncharacterized protein loc4339047 isoform x2
Os06g0166500	1.33201	1.09204e-05	0.000332618	auxin-responsive protein iaa20-like
Os06g0141700	3.11175	1.09697e-05	0.000333761	early nodulin
Os03g0830500	2.87836	1.15018e-05	0.0003477	cell number regulator 10-like
Os05g0368666	6.83678	1.17166e-05	0.000352782	subtilisin-like protease
Os06g0713400	1.30056	1.2116e-05	0.000361985	F-box/LRR-repeat protein At3g59200
Os02g0563000	2.00846	1.21253e-05	0.000361985	F-box/kelch-repeat protein At2g44130
Os01g0854000	1.31756	1.21281e-05	0.000361985	uncharacterized acetyltransferase at3g50280
Os10g0389500	2.15686	1.21933e-05	0.000363164	-
Os03g0793900	3.53549	1.25902e-05	0.000373799	tpa: bifunctional inhibitor ltp seed storage protein family
Os05g0125300	1.54107	1.28991e-05	0.000382167	serine threonine-protein kinase cdl1-like
Os11g0644700	1.76847	1.31249e-05	0.00038845	dirigent protein 21-like
Os03g0406900	2.49231	1.34081e-05	0.000395177	protein laz1 homolog 2
Os11g0669200	2.11361	1.38178e-05	0.000404714	cysteine-rich receptor-like protein kinase 19 isoform x2
Os07g0673900	1.0872	1.38998e-05	0.000406696	uncharacterized protein loc4344259
Os06g0695500	1.37044	1.39881e-05	0.000408433	peroxidase 16-like
Os03g0382100	6.18679	1.4319e-05	0.000417232	3-ketoacyl- synthase 12-like
Os03g0168100	3.04175	1.56953e-05	0.000454054	late embryogenesis abundant group 3 isoform x1
Os01g0757200	1.20403	1.59029e-05	0.000459588	gibberellin 2-oxidase
Os08g0472000	1.02597	1.63502e-05	0.00047155	bzip transcription factor trab1
Os04g0443801	4.71052	1.64009e-05	0.000472531	12-oxophytodienoate reductase 13
Os02g0509600	1.09044	1.7308e-05	0.000495129	uncharacterized protein loc4329447
Os11g0592300	1.30424	1.74464e-05	0.000498581	probable galacturonosyltransferase 4
Os10g0507700	3.1605	1.76419e-05	0.000502136	hypothetical protein OsI_34259 [Oryza sativa Indica Group]
Os01g0880300	1.04748	1.77971e-05	0.000506043	probable pectinesterase pectinesterase inhibitor 51
Os10g0362700	3.25648	1.82805e-05	0.000516954	-
Os05g0417700	1.76221	1.93122e-05	0.000543107	uncharacterized protein loc4338811
Os08g0238200	1.97821	1.96555e-05	0.000551663	endo- -beta-d-glucanase
Os01g0871900	1.38553	1.98557e-05	0.000555076	peptide transporter
Os02g0734900	1.00339	1.9963e-05	0.000557275	erwinia induced protein 2
Os06g0729400	1.02918	2.07132e-05	0.000575628	-
Os02g0673500	1.12514	2.10342e-05	0.000583399	hlh dna-binding domain superfamily protein
Os05g0421600	2.10583	2.11328e-05	0.000585439	nac transcription factor
Os07g0622700	1.23814	2.18997e-05	0.000603255	tpa: hydrolase
Os02g0136150	3.45732	2.21476e-05	0.000608898	-
Os10g0530500	7.69899	2.26217e-05	0.000621326	probable glutathione s-transferase gstu6
Os09g0306566	2.23104	2.28749e-05	0.000625845	uncharacterized protein loc103998642
Os01g0221000	2.45189	2.29406e-05	0.000627035	probable indole-3-acetic acid-amido synthetase
Os12g0572000	1.10918	2.33072e-05	0.000635826	transcription factor as1-like
Os01g0220500	2.56855	2.42843e-05	0.000660022	-
Os06g0156600	1.21405	2.58893e-05	0.000699507	gdsl esterase lipase at5g45910-like
Os09g0375300	1.03681	2.60712e-05	0.000703748	protein altered xyloglucan 4-like
Os03g0719400	2.39776	2.61318e-05	0.000704134	monoglyceride lipase-like
Os11g0177750	1.8337	2.63789e-05	0.000710019	abc transporter g family member 25
Os09g0509700	1.33224	2.6756e-05	0.000718798	zinc finger protein constans-like 14
Os12g0594000	2.34871	2.79168e-05	0.000744316	vegetative incompatibility protein het-e-1
Os01g0604900	1.15629	2.96762e-05	0.000786769	-
Os03g0176900	1.57937	3.11521e-05	0.000823576	uncharacterized protein loc4331806
Os07g0448400	1.84984	3.16868e-05	0.000835365	plasma membrane integral protein
Os06g0635200	1.51742	3.32275e-05	0.000870296	uncharacterized protein loc103983209 isoform x1
Os09g0572500	3.74267	3.33715e-05	0.000872265	mannan synthase 1-like
Os12g0634500	3.47381	3.33861e-05	0.000872265	ocs element-binding factor 1
Os06g0572400	1.06102	3.34082e-05	0.000872265	senescence-associated protein 5
Os11g0644500	4.06937	3.34693e-05	0.000872265	agmatine coumaroyltransferase
Os10g0469600	3.91112	3.42126e-05	0.000890316	leucine rich repeat family expressed
Os02g0232000	1.93451	3.49471e-05	0.000907701	heat shock factor protein 1
Os01g0350300	6.64452	3.49771e-05	0.000907701	nbs-lrr partial
Os01g0732700	1.63657	3.51788e-05	0.000912098	indole-3-pyruvate monooxygenase yucca2-like
Os05g0171200	4.22954	3.53438e-05	0.000914695	lipase plat lh2
Os12g0515500	1.10323	3.54932e-05	0.000916881	zinc finger ccch domain-containing protein 67-like
Os10g0361900	7.52429	3.6058e-05	0.000928921	-
Os05g0573300	1.40353	3.61901e-05	0.000931475	ctp synthase
Os01g0125550	2.96894	3.71709e-05	0.000954978	Os01g0125500, partial [Oryza sativa Japonica Group]
Os04g0418800	1.01019	3.8389e-05	0.000981895	-
Os03g0184100	1.58402	3.84909e-05	0.000983521	-
Os01g0313300	1.35966	3.93437e-05	0.0010035	ethylene-responsive transcription factor erf071-like
Os03g0381500	3.77513	4.19005e-05	0.00105819	uncharacterized protein loc4332980
Os12g0541300	1.45353	4.19571e-05	0.00105868	respiratory burst oxidase homolog protein b-like
Os02g0692700	1.09591	4.21703e-05	0.00106216	-
Os06g0229400	2.19304	4.23271e-05	0.00106516	gdsl esterase lipase at1g74460
Os07g0229700	1.10131	4.27517e-05	0.00107393	transcription elongation factor a protein 2
Os05g0537400	1.11739	4.31763e-05	0.00108267	probable protein phosphatase 2c 50
Os05g0461600	1.22063	4.34576e-05	0.00108779	-
Os01g0543100	1.21545	4.35825e-05	0.00108995	peroxidase 72-like
Os11g0204800	1.31766	4.37059e-05	0.00109207	stem-specific protein tsjt1-like
Os01g0198000	1.51378	4.38606e-05	0.00109303	rna-dependent rna polymerase -like
Os01g0101900	2.91485	4.58787e-05	0.0011373	uncharacterized protein tcm_017240
Os07g0602100	1.16158	4.63145e-05	0.00114409	uncharacterized hydrolase -like
Os06g0687600	1.43179	4.91212e-05	0.00120708	protein irx15-like-like
Os03g0740200	2.10809	4.97698e-05	0.00122115	-
Os09g0527700	1.43453	5.18982e-05	0.0012676	auxin-induced protein 22d-like
Os12g0431100	5.88136	5.21315e-05	0.0012711	cell division protein aaa atpase family
Os01g0846000	1.3573	5.68858e-05	0.00137162	-
Os04g0574200	1.16591	5.70506e-05	0.00137442	fasciclin-like arabinogalactan protein 8
Os06g0725550	2.0684	5.73917e-05	0.00138091	uncharacterized protein loc4342111
Os11g0458100	1.21607	5.81857e-05	0.001397	dna ligase 1
Os04g0506300	1.32272	5.88288e-05	0.00140885	probable serine incorporator
Os05g0485000	2.73298	5.94358e-05	0.00142218	cation h(+) antiporter 15-like
Os04g0560100	4.54069	6.15169e-05	0.00146948	cytochrome p450 superfamily protein
Os03g0161600	1.81184	6.18213e-05	0.00147426	epidermal patterning factor-like protein 4
Os08g0335600	2.52646	6.21694e-05	0.00147881	-
Os03g0286900	3.05027	6.57805e-05	0.00156208	low temperature-induced protein
Os08g0505900	1.13757	6.9333e-05	0.00163817	DNA-damage-repair/toleration protein DRT100
Os10g0527601	6.33574	7.16655e-05	0.00168202	glutathione s-transferase expressed
Os06g0160700	1.21211	7.27702e-05	0.00170088	soluble starch synthase i
Os01g0839200	1.65011	7.56155e-05	0.00176357	-
Os06g0200500	4.55543	7.69802e-05	0.00179016	Os06g0200500 [Oryza sativa Japonica Group]
Os04g0546500	3.77664	7.90427e-05	0.00183164	oleosin 16 kda
Os08g0128000	1.01177	7.90779e-05	0.00183164	Kelch repeat-containing protein At3g27220
Os01g0914100	1.03875	7.96079e-05	0.00184089	lipid-transfer protein dir1
Os06g0220100	2.0498	7.98829e-05	0.00184574	-
Os03g0154000	1.7557	8.07943e-05	0.00186223	fad binding domain containing expressed
Os07g0587200	1.58759	8.16943e-05	0.0018799	-
Os02g0539600	1.15088	8.41708e-05	0.00192746	ribonuclease j isoform x1
Os05g0140300	3.73532	8.49799e-05	0.00194284	-
Os01g0304100	1.47862	8.87537e-05	0.00201444	cation-chloride cotransporter 2 isoform x2
Os01g0706800	2.33358	9.25744e-05	0.00208606	Agglutinin
Os04g0457300	1.21542	9.39895e-05	0.00211458	wat1-related protein at3g30340
Os07g0692600	2.57051	9.41434e-05	0.00211635	dna repair protein rhp54
Os02g0824500	1.19552	9.52978e-05	0.0021355	remorin isoform x1
Os02g0686100	2.99655	9.59292e-05	0.00214795	ring-h2 finger protein atl1r
Os02g0463500	3.85699	9.89366e-05	0.00220654	serine carboxypeptidase 1 isoform x1
Os04g0498101	1.12339	0.000100011	0.00222523	van3-binding protein
Os02g0637200	1.76306	0.000101439	0.0022497	uncharacterized protein loc4330089
Os06g0107100	2.04133	0.00010285	0.0022736	uncharacterized membrane protein isoform x2
Os02g0216000	3.38278	0.000103071	0.0022736	protein kinase xa21
Os02g0797200	1.1067	0.000105502	0.00231818	60s ribosomal protein l39
Os01g0114600	3.21921	0.000106646	0.00233966	glycerophosphodiester phosphodiesterase protein kinase domain-containing gdpdl2-like
Os05g0525900	1.16733	0.000107495	0.00235099	ccch transcription factor
Os11g0645400	1.0714	0.000109914	0.00239093	dirigent protein 21-like
Os03g0377700	1.07159	0.000110137	0.00239393	probable mannan synthase 7
Os01g0913100	1.03067	0.000111081	0.00241074	-
Os03g0199500	1.80032	0.000112472	0.0024353	uncharacterized protein loc4331962
Os06g0304600	1.08382	0.000115026	0.0024868	protein aspartic protease in guard cell 1-like
Os07g0592100	1.09686	0.000116261	0.00250586	momilactone a synthase-like
Os01g0266800	1.05614	0.000120789	0.00258762	pq loop repeat family protein
Os05g0155200	1.00153	0.000120989	0.00258797	ethylene receptor-like
Os11g0546300	1.14486	0.000123278	0.00262896	patatin-like phospholipase domain-containing protein 2
Os09g0426100	1.75649	0.000124963	0.00265889	wat1-related protein at4g30420-like
Os10g0533500	1.41423	0.000130085	0.00275127	beta-carotene hydroxylase
Os01g0136300	1.62011	0.000133766	0.00281647	-
Os10g0537400	1.33482	0.000133929	0.0028178	heavy metal-associated isoprenylated plant protein 26
Os03g0861300	1.43641	0.000136439	0.00286421	aquaporin pip2-1-like
Os01g0505700	1.04402	0.000137085	0.00287349	-
Os06g0666800	1.13028	0.000139166	0.00291063	uncharacterized protein loc4341783
Os11g0151800	4.79413	0.000139529	0.00291504	probable purple acid phosphatase 20
Os07g0559100	1.77534	0.000139583	0.00291504	uncharacterized protein loc100840980
Os04g0649400	5.91408	0.000140848	0.00293927	wuschel-related homeobox 4-like
Os09g0441000	1.14947	0.000141238	0.00294524	subtilisin-like protease
Os01g0133200	1.10673	0.000141432	0.00294711	-
Os08g0502600	2.09328	0.000141656	0.00294829	calcium-binding ef-hand family
Os06g0710001	1.98594	0.000143663	0.0029804	-
Os10g0198100	1.67174	0.000146344	0.00302934	uncharacterized protein loc4348253
Os03g0777000	3.22322	0.000147186	0.00303786	transcription factor jungbrunnen 1-like
Os01g0508000	1.33428	0.000159343	0.00326728	beta-glucosidase 1-like
Os12g0284800	6.28805	0.00016152	0.00329755	uncharacterized protein loc107277846 isoform x1
Os11g0121500	1.08643	0.000164705	0.00335529	serine threonine-protein kinase nak
Os02g0511100	1.32737	0.000175833	0.00354871	11-beta-hydroxysteroid dehydrogenase 1b-like
Os03g0157700	2.09364	0.000177228	0.00357176	uncharacterized protein loc103979780
Os05g0138300	1.17514	0.000177897	0.00358269	hydrophobic protein lti6b
Os04g0498000	1.08575	0.000178199	0.00358366	-
Os03g0807900	2.95439	0.000181979	0.00365188	uncharacterized protein loc103704570
Os05g0526900	3.95278	0.000186043	0.0037202	anthocyanidin -o-glucosyltransferase
Os10g0509600	2.76093	0.000190589	0.0037923	-
Os03g0268600	3.23136	0.000198226	0.00391942	probable protein phosphatase 2c 30
Os12g0225100	1.08321	0.000202256	0.00399349	la-related protein 6b
Os11g0546600	3.25079	0.000206655	0.00407181	probable phospholipase a2 homolog 2
Os12g0634600	5.93433	0.000212969	0.00417583	-
Os01g0794400	2.05526	0.000221714	0.00433225	probable nucleoredoxin 2 isoform x2
Os03g0425300	1.22078	0.000222125	0.00433727	diacylglycerol kinase 1
Os03g0232400	1.87909	0.000226046	0.00440471	phytosulfokines 2
Os12g0224400	1.04167	0.000230483	0.00447572	xyloglucan galactosyltransferase katamari1 homolog
Os09g0128400	1.16717	0.000238848	0.00458767	-
Os07g0142500	2.92646	0.000241664	0.00463231	protein app1
Os01g0112600	1.44062	0.000249954	0.00475889	-
Os10g0551200	1.15618	0.000251035	0.00476983	scarecrow-like protein 6
Os08g0520850	1.54099	0.000259387	0.00490264	uncharacterized protein loc104752080
Os01g0178300	2.52522	0.000266984	0.00502111	-
Os09g0549600	1.95107	0.000271159	0.00509054	uncharacterized protein loc4347780
Os10g0472900	4.31174	0.000274184	0.00514049	3-ketoacyl- synthase 12-like
Os02g0140800	5.92067	0.000286286	0.00534361	-
Os08g0535200	5.78414	0.000290894	0.00541067	bidirectional sugar transporter sweet11-like
Os10g0554300	1.21701	0.000299443	0.00554775	flavin-containing monooxygenase fmo gs-ox-like 2
Os01g0606900	5.84673	0.000300808	0.00556939	dnaj homolog subfamily b member 3-like
Os03g0435900	3.87117	0.000304622	0.00562894	mitotic-spindle organizing protein 1b-like
Os03g0826800	1.45375	0.000305861	0.00564443	-
Os02g0764700	2.10011	0.000309363	0.00569789	ethylene-responsive element binding protein 2
Os10g0505900	6.70871	0.000311009	0.00571795	-
Os08g0403300	2.09895	0.000312511	0.00573549	heavy metal-associated isoprenylated plant protein 26-like
Os03g0103400	1.38185	0.000312836	0.00573566	scarecrow-like protein 6
Os09g0266000	1.60361	0.000314283	0.00575845	nuclear transport factor 2 -like protein
Os01g0198100	1.56872	0.000351706	0.00636797	probable rna-dependent rna polymerase 4 isoform x1
Os07g0534000	1.78923	0.00035243	0.00636797	thylakoid lumenal kda protein chloroplastic
Os01g0758000	1.38144	0.000352492	0.00636797	heavy metal-associated isoprenylated plant protein 26-like
Os04g0644800	1.11688	0.000357878	0.00644431	chloride channel-like protein clc-g
Os12g0508100	1.07811	0.000368912	0.00660928	pxmp2 4 family protein 4-like
Os05g0356700	1.2832	0.000385293	0.00687658	protein trichome birefringence-like 33
Os01g0186000	3.69321	0.000386227	0.0068889	wrky transcription partial
Os08g0399300	2.10812	0.000388407	0.00691904	uncharacterized protein loc4345509
Os08g0512500	1.65734	0.000398512	0.00706359	psbp domain-containing protein chloroplastic
Os03g0401951	1.13845	0.000398523	0.00706359	-
Os07g0523700	1.65403	0.00040247	0.00711123	60s ribosomal protein l44
Os01g0500100	3.61709	0.000415978	0.0073042	partial
Os01g0507700	1.1859	0.0004174	0.00732065	heavy metal-associated isoprenylated plant protein 26-like
Os01g0555100	3.49404	0.000419403	0.00734606	zinc finger protein
Os05g0100100	1.36689	0.000423849	0.00741473	uncharacterized protein loc9269814
Os04g0648600	1.72742	0.000428802	0.00749674	uncharacterized protein loc4337212
Os06g0329300	1.40032	0.000434008	0.00757837	-
Os08g0472400	1.08819	0.000438481	0.00763758	-
Os12g0135100	1.58477	0.000438933	0.00764073	phosphoglycerate mutase-like protein 4
Os11g0114900	5.94956	0.000440484	0.00765829	non-specific lipid-transfer protein 4-like
Os04g0679200	1.49398	0.000459243	0.00793458	serine threonine-protein kinase
Os03g0808000	2.90209	0.000461508	0.00795599	polygalacturonase adpg1-like
Os05g0231700	1.08392	0.000464702	0.00800053	probable aquaporin tip4-1
Os07g0132300	1.31661	0.000470311	0.0080823	epidermal patterning factor-like protein 2
Os01g0257300	1.12269	0.00047567	0.00815456	flowering-promoting factor 1-like protein 1
Os06g0318500	2.64628	0.000477614	0.00817795	sodium hydrogen exchanger 4
Os04g0126900	1.95651	0.000482575	0.00823791	partial
Os01g0350100	6.0318	0.000485713	0.00828146	cytochrome p450 89a2-like
Os12g0168100	6.62199	0.000488812	0.00832927	ethylene-responsive transcription factor erf110-like isoform x1
Os06g0258000	3.12651	0.00050211	0.00850965	protein odorant1
Os02g0829850	1.92648	0.000514947	0.0086907	uncharacterized protein loc101753565
Os03g0236200	1.91693	0.000514948	0.0086907	glutamate decarboxylase 1
Os01g0898800	1.06589	0.00052532	0.00883933	uncharacterized protein loc4325113
Os07g0551600	1.35424	0.000528032	0.00887439	probable mixed-linked glucan synthase 9
Os11g0151200	1.55053	0.000531865	0.00892818	transposon unclassified
Os05g0501700	1.21122	0.000537994	0.00900964	usp family protein
Os12g0480100	1.3147	0.000550592	0.0091874	high-light-induced chloroplastic
Os04g0552700	1.3216	0.000552826	0.00921153	zinc finger protein zat1-like
Os07g0214600	3.59926	0.000552985	0.00921153	allergenic protein
Os06g0570566	1.69616	0.000553622	0.0092167	ent-kaurene oxidase 2 isoform x3
Os04g0223500	3.36111	0.00056911	0.00944279	probable flavin-containing monooxygenase 1
Os01g0666400	1.87856	0.000581368	0.00958257	GDSL esterase/lipase At4g10955
Os03g0850600	1.45173	0.000588379	0.00968116	integral membrane protein
Os09g0452900	1.76093	0.000588969	0.00968523	avr9 elicitor response protein
Os06g0166400	1.56244	0.000591373	0.0097078	ethylene-responsive transcription factor rap2-9
Os01g0385400	1.19969	0.000593376	0.00973502	s-type anion channel slah2
Os05g0541200	1.51777	0.0006051	0.0098986	lysine decarboxylase-like protein
Os08g0414500	1.24252	0.000624681	0.0101953	transcription factor ibh1-like
Os08g0169300	3.55827	0.000655435	0.0106235	trans-resveratrol di-o-methyltransferase-like
Os05g0390300	1.09316	0.000661206	0.0106864	-
Os08g0494000	1.14908	0.000663614	0.0107192	harpin-induced protein
Os09g0555550	5.61942	0.000666869	0.0107595	phytoene synthase chloroplastic
Os04g0629600	1.1347	0.000696177	0.0111799	transposon unclassified
Os06g0201000	2.60083	0.000697055	0.0111826	uncharacterized protein loc4340414
Os08g0110600	2.85684	0.000702988	0.0112631	-
Os08g0171700	2.55113	0.000703269	0.0112631	-
Os12g0464400	6.25565	0.000720105	0.0114806	11-beta-hydroxysteroid dehydrogenase 1b-like
Os01g0578700	1.30713	0.000725379	0.0115321	uncharacterized protein loc9269129
Os09g0395400	1.01052	0.000745759	0.0117927	unknown protein [Oryza sativa Japonica Group]
Os09g0298100	2.39217	0.000745946	0.0117927	pyrophosphate--fructose 6-phosphate 1-phosphotransferase subunit alpha-like
Os02g0732600	3.56151	0.000751473	0.0118536	protein odorant1
Os03g0327700	1.24577	0.00075703	0.0119345	retrotransposon ty1-copia subclass
Os07g0142300	2.14452	0.000765817	0.0120327	protein app1
Os07g0548500	1.13537	0.000766686	0.0120397	-
Os05g0550600	2.42788	0.000768117	0.0120488	Non-specific lipid-transfer protein 2
Os10g0456900	1.01273	0.000789087	0.0122957	midasin isoform x1
Os04g0206401	5.45258	0.000792625	0.0123305	uncharacterized protein loc107280484
Os04g0527900	2.54872	0.000795927	0.0123577	aquaporin tip3-1-like
Os04g0465700	1.25689	0.000802095	0.0124108	probable rna-dependent rna polymerase 2
Os01g0315600	2.49255	0.000814148	0.0125683	caffeoylshikimate esterase-like
Os03g0309400	5.73874	0.000814951	0.0125738	probable pectinesterase 67
Os11g0533100	1.08682	0.000815976	0.0125828	#NAME?
Os11g0142400	2.77155	0.000825364	0.0126791	protein strictosidine synthase-like 10-like
Os08g0205800	2.38326	0.00082786	0.0127036	-
Os02g0161601	5.79337	0.000833811	0.0127602	hypothetical protein [Oryza sativa Japonica Group]
Os08g0551900	1.12644	0.000837472	0.0128024	uncharacterized protein loc107275728
Os04g0486300	1.41706	0.000843135	0.012875	uncharacterized protein loc4336213 isoform x2
Os08g0553700	1.17048	0.000876212	0.0132938	uncharacterized protein loc4346271
Os04g0661100	6.2824	0.000895631	0.0135448	uncharacterized protein loc107277463
Os05g0426000	3.8515	0.000901101	0.013583	seven-transmembrane-domain protein 1
Os01g0283300	2.3367	0.00091207	0.0137126	-
Os07g0593400	1.60441	0.000915762	0.0137515	vesicle transport protein got1b-like
Os03g0613100	1.5028	0.000916468	0.0137515	arf guanine-nucleotide exchange factor gnom
Os08g0205000	1.18675	0.000919899	0.013779	hydroxyanthranilate hydroxycinnamoyltransferase 2
Os02g0485000	2.39065	0.000943606	0.0140743	quercetin 3-o-glucoside-6 -o-malonyltransferase
Os12g0265100	2.76838	0.000951673	0.0141797	isoflavone reductase homolog
Os03g0453800	1.00059	0.000961264	0.0142999	expressed protein [Oryza sativa Japonica Group]
Os05g0546400	2.00505	0.000973292	0.0144332	-
Os03g0415600	5.45747	0.000991228	0.0146377	mitochondrial import inner membrane translocase subunit tim17-2-like
Os03g0143900	1.08116	0.000994426	0.0146773	dirigent protein 16
Os10g0504100	2.68652	0.00102183	0.0150034	-
Os06g0704500	1.09319	0.00102563	0.0150435	leucine-rich repeat extensin-like protein 7
Os01g0836900	1.12461	0.00102845	0.015077	-
Os06g0345200	1.02042	0.00103813	0.0151731	nicotianamine aminotransferase a
Os03g0360600	5.4841	0.00104327	0.0152173	mitochondrial transcription termination factor family protein
Os11g0652100	1.0463	0.00105067	0.0152994	Putative disease resistance protein At1g59780
Os06g0660400	1.98108	0.00106224	0.015444	-
Os08g0269000	1.15316	0.00106644	0.0154891	uncharacterized protein loc100834209 isoform x1
Os02g0463401	2.07304	0.00106726	0.0154931	-
Os03g0340500	1.85774	0.00108318	0.0156758	sucrose synthase 4
Os12g0166600	1.20346	0.00108399	0.0156795	nbs-lrr partial
Os07g0227300	1.19995	0.0011129	0.0160156	proline-rich receptor-like protein kinase perk3
Os02g0518600	2.35275	0.0011183	0.0160635	high-affinity potassium transporter
Os10g0111400	3.83528	0.00113088	0.0161919	wall-associated receptor kinase 2-like
Os05g0524100	1.07342	0.00114406	0.0163391	-
Os04g0667300	5.66865	0.00114538	0.0163497	flavonol synthase flavanone 3-hydroxylase
Os11g0621400	2.50305	0.00114845	0.016377	stress enhanced protein chloroplastic
Os01g0224400	1.21849	0.00114977	0.0163875	mitochondrial carrier protein mtm1-like
Os06g0211700	1.98525	0.00115337	0.0164224	galactoside 2-alpha-l-fucosyltransferase
Os11g0661600	2.70398	0.00115414	0.0164231	peroxidase 1-like
Os03g0722500	1.03445	0.00115459	0.0164231	glucan endo- -beta-glucosidase 7
Os12g0197100	1.07606	0.00119846	0.0169446	phosphoribosylamine--glycine ligase
Os03g0767900	1.1103	0.00123159	0.0172918	casp-like protein 5c1
Os05g0210400	1.47527	0.00124125	0.0173757	gdsl esterase lipase at5g45910-like
Os01g0221100	1.30501	0.00127815	0.0177708	probable indole-3-acetic acid-amido synthetase
Os03g0246100	2.12618	0.00128782	0.0178857	glucan endo- -beta-glucosidase 11-like
Os01g0810100	1.02063	0.00130301	0.0180703	uncharacterized protein loc4327567
Os04g0545250	2.32549	0.00130347	0.0180703	-
Os03g0718800	1.4803	0.00130367	0.0180703	cortical cell-delineating protein
Os05g0130400	1.79086	0.00130513	0.0180816	upf0481 protein at3g47200-like
Os03g0155700	1.09076	0.0013124	0.0181645	alpha-expansin partial
Os01g0660900	2.7089	0.00134267	0.018538	phosphoglycerate mutase family protein
Os06g0620000	5.43828	0.00134601	0.018566	uncharacterized protein loc107280149 isoform x2
Os04g0461000	3.29027	0.00134734	0.0185753	myb-related protein myb4-like
Os04g0620200	1.02505	0.00135302	0.0186262	uncharacterized protein loc4337028 isoform x1
Os03g0761000	1.15345	0.00139894	0.0191649	protein tri1
Os01g0218500	1.43061	0.001406	0.0192338	protein heading date 3b-like
Os02g0219200	1.25228	0.00141613	0.0193536	beta-galactosidase 4
Os09g0479300	1.2458	0.00141853	0.0193769	uncharacterized protein loc4347379
Os09g0110300	1.54378	0.00143393	0.0195345	kynurenine formamidase
Os08g0327700	5.39493	0.00144237	0.0196228	seed maturation protein
Os01g0358400	1.17675	0.00146136	0.019842	40s ribosomal protein s4
Os10g0512400	1.26201	0.00146153	0.019842	cytochrome p450 84a1-like
Os06g0553001	1.41786	0.00147839	0.0199874	heat shock factor protein 3
Os02g0703600	1.45459	0.00149111	0.0200762	aba 8 -hydroxylase
Os03g0304100	5.32101	0.00149605	0.0201243	-
Os01g0525350	1.35934	0.00150917	0.0202746	-
Os08g0109400	1.04814	0.00151936	0.02037	auxin-responsive protein iaa25
Os05g0132800	1.01286	0.00156361	0.0208248	Os05g0132800, partial [Oryza sativa Japonica Group]
Os01g0594800	1.79114	0.00158698	0.021074	loc100037820 isoform x1
Os03g0220100	2.6709	0.00158755	0.021074	3-ketoacyl- synthase 6-like
Os12g0242500	2.25159	0.00158919	0.021086	-
Os01g0306400	5.47345	0.00159888	0.0211905	transcription factor hbp-1b -like
Os03g0269700	6.05123	0.00159995	0.0211905	uncharacterized protein loc103716754
Os02g0649300	6.27737	0.00161582	0.021329	homeobox-leucine zipper protein hox24
Os03g0276300	1.24371	0.00161992	0.021368	dof-type zinc finger protein partial
Os08g0480000	1.31797	0.00165999	0.0217797	protein detoxification 27-like
Os07g0631900	1.25801	0.00171019	0.0222958	ribonucleoprotein a
Os02g0592700	1.06854	0.00177675	0.0230017	-
Os01g0976200	1.05705	0.00180532	0.023286	11s seed storage protein
Os01g0700400	4.16872	0.00180864	0.0233163	flavonoid 3 -hydroxylase-like
Os05g0595800	1.33188	0.00180932	0.0233163	leucine-rich repeat receptor-like serine threonine-protein kinase bam3
Os08g0277300	2.14956	0.00181469	0.0233749	sulfotransferase 17
Os04g0565200	1.1397	0.00186645	0.0238783	cis-zeatin o-glucosyltransferase
Os06g0601000	1.03261	0.00188395	0.0240585	protein overexpressor of cationic peroxidase 3
Os02g0651900	1.61475	0.00188582	0.0240715	-
Os07g0480900	5.43621	0.00189491	0.0241656	probable cysteine proteinase a494
Os08g0463900	1.66917	0.00191854	0.0244023	protein embryo sac development arrest chloroplastic
Os06g0552700	2.6634	0.00193767	0.0245889	aquaporin nip1-1
Os10g0459600	1.44614	0.00194678	0.0246934	xyloglucan galactosyltransferase katamari1 homolog
Os07g0599600	2.84457	0.00195895	0.0248254	-
Os03g0321100	1.35317	0.0019657	0.0248997	expressed protein [Oryza sativa Japonica Group]
Os03g0245700	2.60387	0.00198638	0.0251279	3-ketoacyl- synthase 1-like
Os11g0108650	1.0051	0.00202794	0.025562	laccase-12-like
Os07g0510833	1.09524	0.00206819	0.0259766	l-ascorbate oxidase homolog
Os01g0958200	1.44182	0.00207043	0.0259931	g-type lectin s-receptor-like serine threonine-protein kinase sd2-5
Os01g0873200	1.10986	0.0020811	0.0261039	chloroplastic-like
Os01g0123500	5.22165	0.00211877	0.0265239	ubiquitin-protein ligase zinc ion binding protein
Os09g0491822	3.67308	0.00211928	0.0265239	cinnamoyl- reductase 2-like
Os01g0695700	1.39219	0.00213097	0.0266466	abc transporter b family member 11
Os09g0451400	5.49082	0.00213526	0.0266797	1-aminocyclopropane-1-carboxylate oxidase 1
Os03g0346200	3.60343	0.00217325	0.0270554	flowering-promoting factor 1-like protein 5
Os12g0145100	1.30837	0.0022268	0.0275399	stem-specific protein tsjt1
Os02g0823700	1.96326	0.00223759	0.0276492	probable xyloglucan endotransglucosylase hydrolase protein 32
Os01g0953801	5.58993	0.00224989	0.0277647	at-hook motif nuclear-localized protein 15-like
Os02g0678800	1.27687	0.00228143	0.0281047	growth-regulating factor 10-like
Os03g0756500	1.55416	0.00228443	0.0281295	protein leo1 homolog
Os01g0266400	1.03779	0.00230127	0.0282752	-
Os03g0625300	5.5357	0.00231816	0.0284085	-
Os03g0796600	1.06617	0.00233991	0.0285925	-
Os05g0328000	1.13363	0.00239441	0.0291405	-
Os01g0872000	1.25505	0.00240092	0.0291947	peptide transporter
Os03g0786500	1.01006	0.00245696	0.0297735	dna-binding protein hexbp-like
Os06g0180300	1.80475	0.00247316	0.0298928	-
Os07g0627500	1.39676	0.00247517	0.029899	uncharacterized protein loc107278388 isoform x1
Os01g0383900	1.10166	0.00247578	0.029899	nuclear pore complex protein nup98a-like isoform x1
Os02g0512400	1.21548	0.00254923	0.0306679	grx_c8 - glutaredoxin subgroup iii
Os04g0550600	1.13157	0.00255054	0.0306705	carotenoid cleavage dioxygenase chloroplastic
Os02g0666500	2.44397	0.00257479	0.0308964	cytochrome p450 86a2
Os08g0298700	1.95717	0.00262504	0.0313652	fatty acyl- reductase 1
Os11g0108700	1.07795	0.00263213	0.0314109	lac17_orysj ame: full= laccase-17 ame: full=benzenediol:oxygen oxidoreductase 17 ame: full=diphenol oxidase 17 ame: full=urishiol oxidase 17 flags: precursor
Os01g0913600	1.23093	0.00265644	0.0316209	rho gdp-dissociation inhibitor 1
Os02g0176300	1.9366	0.00266669	0.031716	transmembrane protein 230
Os02g0178800	1.44068	0.0027007	0.0320531	protein eceriferum 3-like
Os09g0452400	1.14126	0.00270468	0.0320789	aspartic proteinase nepenthesin-1
Os01g0911700	2.04768	0.00272841	0.0322869	viviparous1 protein
Os10g0345100	1.33923	0.00273861	0.0323805	protein detoxification 16-like
Os09g0400500	1.09204	0.00275237	0.0324752	receptor kinase
Os01g0700900	1.23791	0.00277931	0.0327497	cytochrome p450 711a1
Os01g0127450	1.7617	0.00279007	0.0328104	myb-related protein 308-like
Os10g0506900	1.28527	0.00282549	0.0331992	uncharacterized protein loc9271722
Os07g0581400	1.33526	0.0028848	0.0337976	Os07g0581400, partial [Oryza sativa Japonica Group]
Os04g0535200	1.07702	0.00290412	0.0339958	aspartic proteinase nepenthesin-1
Os01g0920800	3.39598	0.00292967	0.0342381	uncharacterized protein at4g15970-like
Os02g0180900	2.74949	0.0029444	0.0343902	-
Os05g0500600	1.29628	0.00296728	0.0345684	scarecrow-like protein 32
Os05g0448700	1.0095	0.00297889	0.0346555	-
Os06g0717200	1.01318	0.00304933	0.0352571	leucine-rich repeat receptor-like kinase protein floral organ number1
Os11g0236100	1.09427	0.00306121	0.0353588	probable sucrose-phosphate synthase 5
Os03g0839800	1.50498	0.00306387	0.0353673	-
Os06g0307900	1.03897	0.00310435	0.0357615	uncharacterized protein loc9267634
Os02g0596300	5.66916	0.00314877	0.0361846	cytochrome p450 86b1
Os12g0161900	1.80464	0.0031899	0.0365977	uncharacterized protein loc4351572 isoform x1
Os04g0691900	2.81066	0.00324951	0.0371156	1-phosphatidylinositol-3-phosphate 5-kinase fab1a-like isoform x1
Os01g0700300	2.30668	0.0032668	0.0372529	salicylate carboxymethyltransferase-like
Os07g0669250	1.3149	0.00340553	0.0386165	probable gtp-binding protein chloroplastic
Os11g0207300	1.12721	0.00341714	0.038717	uncharacterized protein loc107893755
Os04g0480802	1.67151	0.00344544	0.0389331	-
Os04g0548700	1.04779	0.0035343	0.0396783	homeobox-leucine zipper protein hox17
Os06g0553100	1.36089	0.00356107	0.0399471	heat shock factor protein 3
Os05g0590201	2.35577	0.00356769	0.0399791	probable esterase kai2
Os08g0557100	1.08742	0.00370054	0.0411357	nucleic acid-binding protein
Os11g0658700	1.83065	0.00377421	0.0417083	agamous-like mads-box protein agl65 isoform x1
Os08g0324300	1.24213	0.00391882	0.0429034	b3 domain-containing protein os08g0325100 isoform x1
Os03g0400700	1.19356	0.00396082	0.0432292	late embryogenesis abundant protein
Os02g0540400	1.1093	0.00396564	0.0432635	protein ida-like 2-like
Os05g0275000	1.09886	0.00396704	0.0432635	Pentatricopeptide repeat-containing protein At2g18940
Os01g0816100	1.4399	0.00405088	0.043991	4 protein
Os06g0500300	1.30598	0.00406097	0.0440655	groundhog protein 7
Os08g0474100	1.00984	0.00406242	0.0440655	-
Os09g0479900	1.23106	0.0040676	0.0440915	subtilisin-like protease
Os04g0607600	1.91324	0.00420784	0.0453122	probable cation transporter hkt7
Os10g0386300	1.13944	0.00433233	0.0464362	-
Os01g0730200	1.75572	0.00442394	0.0471537	ribosomal rna apurinic site specific lyase
Os10g0487200	2.10071	0.00450838	0.0478608	-
Os10g0326400	3.51183	0.00455119	0.0481284	uncharacterized protein loc4348324
Os01g0165600	1.04509	0.00455352	0.048135	-
Os05g0448300	5.14858	0.00455804	0.0481647	glycerol-3-phosphate 2-o-acyltransferase 6
Os04g0564000	1.26128	0.00457992	0.0482851	-
Os01g0934900	1.28817	0.00458078	0.0482851	pir7b protein
Os01g0206200	1.02306	0.00458099	0.0482851	uncharacterized protein loc4327091
Os01g0937600	1.38543	0.00458325	0.0482851	basic 7s globulin 2-like
Os01g0812850	1.86992	0.00458482	0.0482851	hypothetical protein [Oryza sativa Japonica Group]
Os03g0172850	1.21179	0.00463278	0.0485728	cysteine proteinase inhibitor 5-like
Os11g0434800	1.79567	0.0046983	0.0491249	-
Os02g0630300	2.02014	0.00470356	0.0491506	gibberellin 2-beta-dioxygenase 8-like
Os07g0624600	1.0676	0.00473001	0.049354	probable trehalose-phosphate phosphatase 3
Os11g0701400	2.50444	0.0047553	0.0495574	xylanase inhibitor protein 2-like

## Sheet: Sheet2
Supplemental Dataset 2 Down-regulated genes in roots after ABA treatment
GeneID	log2FoldChange	pvalue	padj	Description
Os03g0297600	-4.42055	1.53374e-68	8.66102e-65	abscisic acid receptor pyl4-like
Os07g0611500	-8.1756	1.17037e-66	5.50757e-63	chp-rich zinc finger
Os01g0347600	-7.66748	8.41972e-57	2.64145e-53	cysteine protease
Os07g0542600	-4.17028	8.49591e-53	2.39882e-49	cysteine-rich receptor-like protein kinase 10
Os11g0618700	-5.04394	3.40279e-50	8.73434e-47	uncharacterized protein loc4350932
Os03g0196000	-4.38136	2.36489e-48	5.13636e-45	sulfate transporter
Os11g0555300	-4.38282	4.74898e-46	7.8875e-43	rp1-like protein
Os07g0116050	-5.82079	1.11027e-40	1.49279e-37	-
Os10g0580400	-4.93394	3.76896e-40	4.62681e-37	urea-proton symporter dur3
Os07g0553450	-3.04799	1.31521e-39	1.54729e-36	probable mixed-linked glucan synthase 3
Os10g0370800	-3.30932	9.33674e-38	9.76381e-35	probable glucan -beta-glucosidase a
Os03g0699700	-3.08518	3.80199e-37	3.7017e-34	linoleate 9s-lipoxygenase 1
Os01g0141000	-3.00612	1.04575e-36	9.52471e-34	ap2 domain containing protein
Os11g0643800	-2.78201	1.34702e-35	1.15252e-32	sugar transporter erd6-like 16 isoform x1
Os01g0975300	-3.49606	2.81416e-34	2.27022e-31	myb factor protein
Os06g0546500	-3.26779	3.29113e-34	2.58125e-31	peroxidase p7
Os02g0131400	-3.13015	4.45727e-33	3.22695e-30	beta-glucosidase 3b-like
Os04g0135400	-3.79752	5.11822e-33	3.61283e-30	protein kinase
Os02g0807800	-5.02986	2.77339e-32	1.86444e-29	wall-associated receptor kinase 2-like
Os02g0219000	-7.69916	1.13484e-31	7.28231e-29	-
Os08g0157700	-4.03181	1.80202e-31	1.13067e-28	b3 domain-containing protein os08g0157700
Os07g0611400	-10.3135	3.98903e-31	2.44848e-28	chp-rich zinc finger
Os05g0427400	-3.55359	7.78629e-31	4.67757e-28	phenylalanine ammonia-lyase
Os06g0575400	-2.69363	1.32889e-30	7.65741e-28	receptor protein kinase 1
Os02g0606200	-2.73436	2.31535e-30	1.30748e-27	zinc finger protein
Os06g0604300	-2.6801	3.24378e-28	1.5791e-25	phospholipase d alpha 2-like
Os04g0136016	-4.80649	2.98425e-27	1.40434e-24	growth-regulating factor
Os09g0394600	-4.38041	1.22269e-26	5.47981e-24	type iv inositol polyphosphate 5-phosphatase 9-like
Os01g0810800	-3.90943	2.70778e-26	1.1946e-23	light repressible receptor protein kinase
Os01g0713200	-3.96385	4.57372e-26	1.98676e-23	beta- -glucanase
Os07g0654700	-3.43293	5.00169e-26	2.13974e-23	ble2 protein
Os09g0447500	-5.66741	2.82181e-25	1.17167e-22	cytochrome p450 76m5-like
Os01g0348000	-9.60343	3.21991e-25	1.3176e-22	sag12 protein
Os12g0484600	-3.58919	3.47047e-25	1.39984e-22	nodulin family expressed
Os01g0347500	-9.57951	4.67162e-25	1.85779e-22	sag12 protein
Os09g0561000	-2.50329	5.34013e-24	1.98393e-21	wall-associated receptor kinase 2
Os05g0166300	-5.62471	6.39365e-24	2.34448e-21	g-type lectin s-receptor-like serine threonine-protein kinase at2g19130
Os04g0438200	-7.08505	2.27977e-23	8.25248e-21	-
Os01g0823100	-2.3883	3.18518e-23	1.1384e-20	expansin os-expa2
Os10g0555900	-2.48763	4.73695e-23	1.65121e-20	beta-expansin 1a precursor
Os02g0726300	-2.79702	6.11349e-23	2.07969e-20	dof zinc finger
Os02g0712600	-3.19925	1.05594e-22	3.54934e-20	probable l-type lectin-domain containing receptor kinase
Os08g0202300	-4.14726	1.88277e-22	6.25411e-20	probable lrr receptor-like serine threonine-protein kinase at1g56130 isoform x1
Os08g0200100	-3.23164	3.3298e-22	1.08065e-19	acyl-
Os04g0525100	-5.00022	3.79286e-22	1.21695e-19	udp-glycosyltransferase 82a1-like
Os10g0109300	-2.6691	4.53298e-22	1.43808e-19	peroxidase a2-like
Os04g0659300	-4.60391	1.24738e-21	3.78747e-19	cysteine-rich repeat secretory protein 38
Os02g0571300	-3.82149	1.24751e-21	3.78747e-19	ent-pimara-8 -diene synthase isoform x1
Os03g0738600	-2.131	2.02298e-21	6.07648e-19	linoleate 9s-lipoxygenase 3
Os02g0514326	-3.18461	2.35944e-21	7.01252e-19	glycerophosphodiester phosphodiesterase chloroplastic-like
Os05g0524575	-4.01462	2.89775e-21	8.46747e-19	leucine-rich repeat receptor-like protein kinase at2g19210
Os05g0559316	-2.91636	5.41963e-21	1.54569e-18	-
Os04g0651000	-4.32109	1.01748e-20	2.87285e-18	cationic peroxidase 1-like
Os06g0680500	-2.05068	1.54549e-20	4.27813e-18	glutamate receptor
Os04g0352400	-3.48454	3.60558e-20	9.78879e-18	70 kda peptidyl-prolyl isomerase-like
Os01g0784500	-2.43851	7.40312e-20	1.99073e-17	receptor-like serine threonine-protein kinase sd1-8
Os02g0582900	-4.16634	1.02878e-19	2.74035e-17	uncharacterized protein loc4329797
Os06g0244000	-3.461	1.39919e-19	3.69216e-17	benzoate carboxyl methyltransferase
Os10g0490100	-3.46242	1.66385e-19	4.30999e-17	ripening-related protein 5
Os11g0226966	-3.13097	1.81927e-19	4.66972e-17	-
Os02g0741700	-2.40293	1.87478e-19	4.76886e-17	-
Os11g0569600	-3.61569	4.42742e-19	1.09656e-16	receptor kinase-like protein
Os06g0707300	-3.84518	5.31729e-19	1.30551e-16	-
Os01g0615050	-5.41286	6.23204e-19	1.51691e-16	subtilisin-chymotrypsin inhibitor-2a
Os04g0489600	-2.56618	8.1508e-19	1.96699e-16	transcription factor bhlh129
Os01g0615100	-4.72918	9.656e-19	2.29107e-16	subtilisin-chymotrypsin inhibitor-2a
Os08g0431700	-2.31195	1.04447e-18	2.45755e-16	-
Os07g0517100	-2.63393	1.24762e-18	2.88743e-16	kda class v heat shock protein
Os08g0557200	-3.30298	1.3448e-18	3.08702e-16	manganese-dependent adp-ribose cdp-alcohol diphosphatase
Os02g0331400	-3.26323	1.69791e-18	3.86616e-16	wat1-related protein at3g18200-like
Os03g0171300	-1.99716	3.18045e-18	7.184e-16	transcription factor ili6
Os04g0309900	-1.97561	4.21085e-18	9.43599e-16	uncharacterized protein loc4335448
Os04g0103700	-4.19044	6.18809e-18	1.37575e-15	s-domain receptor-like protein kinase
Os01g0700100	-3.23977	6.76932e-18	1.49322e-15	bidirectional sugar transporter sweet2a-like isoform x1
Os12g0125800	-2.72046	1.0509e-17	2.30017e-15	protein detoxification 21
Os06g0561000	-3.72266	1.27853e-17	2.77687e-15	probable inositol oxygenase
Os01g0916000	-4.14853	2.27218e-17	4.78769e-15	-
Os01g0813800	-3.07775	5.1654e-17	1.05685e-14	beta-glucosidase 2-like
Os07g0503500	-5.20276	5.25499e-17	1.06744e-14	anthocyanidin 3-o-glucosyltransferase 2
Os11g0549620	-3.65494	5.6863e-17	1.14681e-14	tartrate-resistant acid phosphatase type 5 precursor
Os12g0628600	-5.16658	8.55274e-17	1.69108e-14	pathogenesis-related protein 5
Os07g0539900	-5.46508	1.19126e-16	2.33579e-14	beta- -glucanase
Os09g0346500	-2.48294	1.35313e-16	2.63486e-14	chlorophyll a-b binding protein chloroplastic
Os01g0644900	-2.73943	1.52784e-16	2.9547e-14	-
Os02g0658800	-1.80411	2.28776e-16	4.33523e-14	beta-expansin 4 precursor
Os10g0552600	-2.04529	2.37852e-16	4.47717e-14	cortical cell delineating protein expressed
Os09g0554300	-2.87966	2.7164e-16	5.0793e-14	uncharacterized transporter ybr287w-like
Os07g0162600	-3.75177	4.07503e-16	7.37554e-14	probable carboxylesterase 15
Os07g0542400	-2.84443	4.23919e-16	7.62379e-14	cysteine-rich receptor-like protein kinase 10
Os03g0407100	-2.41219	7.90065e-16	1.40299e-13	-
Os03g0225700	-2.44994	7.965e-16	1.40557e-13	wall-associated receptor kinase-like 14
Os11g0208850	-5.33624	8.49615e-16	1.48999e-13	s-domain receptor-like protein kinase
Os09g0498500	-2.01638	1.26537e-15	2.20541e-13	probable sarcosine oxidase
Os09g0334500	-1.98659	1.34669e-15	2.33275e-13	wrky transcription partial
Os10g0148700	-5.30873	1.43138e-15	2.46434e-13	-
Os04g0400700	-2.70071	2.20572e-15	3.77445e-13	uncharacterized protein loc107278200
Os04g0438101	-8.2918	3.13351e-15	5.26636e-13	H0315A08.9 [Oryza sativa Indica Group]
Os02g0222100	-2.01698	3.20316e-15	5.35156e-13	cysteine synthase-like
Os10g0330400	-4.87421	3.31739e-15	5.50979e-13	upf0301 protein tc_0483
Os04g0525200	-3.6814	4.42854e-15	7.26976e-13	udp-glycosyltransferase 82a1-like
Os09g0328600	-6.07835	4.71588e-15	7.6967e-13	ankyrin repeat-containing protein at2g01680-like
Os01g0916100	-6.14325	5.60835e-15	9.04867e-13	-
Os08g0101700	-3.38167	6.4705e-15	1.03217e-12	probable ascorbate-specific transmembrane electron transporter 1
Os06g0112100	-1.85397	6.70284e-15	1.06323e-12	bark storage protein a-like
Os03g0179400	-3.3535	7.98265e-15	1.24525e-12	serine threonine-protein kinase at5g01020-like
Os06g0522300	-4.93887	9.90683e-15	1.52852e-12	bacterial-induced peroxidase precursor
Os11g0708100	-2.4533	1.43018e-14	2.17103e-12	laccase-22
Os01g0532300	-5.36562	1.44631e-14	2.18378e-12	duf4408 domain protein
Os07g0656100	-1.70878	1.46507e-14	2.20033e-12	ctl-like protein ddb_g0274487
Os08g0260600	-4.51828	2.46514e-14	3.60639e-12	senescence-associated protein dh
Os06g0618700	-4.58144	2.86637e-14	4.17175e-12	vq motif family protein
Os11g0575600	-4.75942	3.77524e-14	5.38353e-12	linoleate 9s-lipoxygenase 3
Os09g0564400	-4.3219	4.35099e-14	6.17338e-12	cysteine proteinase
Os05g0382600	-2.08233	4.6172e-14	6.51595e-12	annexin d4
Os08g0189600	-5.05917	7.2564e-14	1.00928e-11	germin a
Os01g0935800	-1.73749	8.53338e-14	1.17277e-11	probable leucine-rich repeat receptor-like protein kinase at5g49770
Os02g0681200	-2.13429	8.55643e-14	1.17277e-11	ring zinc finger
Os05g0136200	-2.43549	9.42102e-14	1.28504e-11	cbl-interacting protein kinase 17
Os12g0263050	-3.03324	1.40985e-13	1.86888e-11	uncharacterized protein loc4351923
Os07g0178700	-2.79414	1.45055e-13	1.91384e-11	early light-induced protein
Os09g0518750	-2.33405	1.53795e-13	2.01973e-11	uncharacterized protein loc107276463
Os11g0691100	-2.27666	1.85578e-13	2.41466e-11	protein kinase
Os09g0348600	-4.80464	2.75798e-13	3.54743e-11	serine threonine-specific receptor protein kinase-like
Os10g0552200	-4.39797	2.76884e-13	3.54743e-11	cortical cell-delineating protein
Os08g0235651	-4.83205	2.77663e-13	3.54743e-11	nbs-lrr partial
Os02g0770800	-1.90768	6.68168e-13	8.34767e-11	nitrate reductase
Os01g0550800	-6.06289	6.74619e-13	8.39113e-11	-
Os06g0185100	-3.50939	6.98112e-13	8.64526e-11	short-chain type dehydrogenase reductase-like
Os01g0784450	-3.23637	1.11698e-12	1.35356e-10	receptor-like serine threonine-protein kinase sd1-8
Os09g0358100	-4.54253	1.15384e-12	1.39225e-10	probable lrr receptor-like serine threonine-protein kinase at1g51810
Os07g0115800	-6.68165	1.23941e-12	1.48914e-10	uncharacterized protein at2g29880-like
Os06g0525200	-3.94882	1.34043e-12	1.59693e-10	-
Os01g0654100	-1.78782	1.35325e-12	1.60542e-10	ctp synthase
Os12g0186600	-3.83196	1.65788e-12	1.95636e-10	retrotransposon unclassified
Os03g0418000	-2.7747	2.09018e-12	2.44881e-10	chitinase
Os03g0120900	-3.1247	2.36017e-12	2.73112e-10	b3 domain-containing protein os03g0120900
Os05g0495600	-2.63026	2.37761e-12	2.74007e-10	probable calcium-transporting atpase plasma membrane-type
Os05g0149300	-2.55419	2.62561e-12	3.01358e-10	acc oxidase
Os04g0445300	-2.52411	2.63825e-12	3.01582e-10	invertase inhibitor
Os10g0379854	-4.02819	2.69744e-12	3.07106e-10	agmatine coumaroyltransferase-1
Os06g0294600	-7.8173	2.82601e-12	3.19169e-10	cytochrome p450 76c2-like
Os12g0102600	-2.40103	3.69433e-12	4.15576e-10	pentatricopeptide repeat-containing protein chloroplastic
Os04g0125700	-1.8497	3.87497e-12	4.34166e-10	l-type lectin-domain containing receptor kinase -like
Os05g0517600	-5.60296	4.04698e-12	4.49868e-10	hemoglobin 1
Os02g0585100	-4.38027	4.83227e-12	5.35056e-10	uncharacterized protein loc4329805
Os03g0776400	-8.21574	5.18625e-12	5.69781e-10	uncharacterized protein loc4334292
Os01g0320400	-3.53719	5.21646e-12	5.70878e-10	-
Os08g0468100	-2.04269	5.4378e-12	5.92804e-10	nitrate reductase
Os01g0330200	-7.92606	5.54575e-12	6.01981e-10	cysteine protease
Os02g0467600	-2.55618	5.56462e-12	6.01981e-10	cytochrome p450 cyp73a100-like
Os03g0300400	-2.69426	6.25014e-12	6.7356e-10	pathogenesis-related protein 1
Os03g0270000	-3.10714	6.85885e-12	7.36349e-10	dna-binding protein escarola
Os04g0675000	-1.97714	7.23048e-12	7.71153e-10	-
Os11g0107000	-1.51918	7.23767e-12	7.71153e-10	protein trichome birefringence-like 34
Os01g0216000	-3.58095	7.88506e-12	8.31792e-10	gdsl esterase lipase at5g45910
Os08g0492000	-2.59695	7.89517e-12	8.31792e-10	oligopeptide transporter 1
Os01g0179000	-1.93347	8.82958e-12	9.26778e-10	3 -n-debenzoyl-2 -deoxytaxol n-benzoyltransferase-like
Os09g0272900	-3.52072	1.17441e-11	1.2102e-09	probable disease resistance protein at1g61300 isoform x1
Os12g0556500	-2.29374	1.27238e-11	1.30165e-09	calmodulin-binding expressed
Os11g0225000	-2.34038	1.40509e-11	1.42708e-09	cysteine-rich receptor-like protein kinase 12 isoform x1
Os07g0681400	-2.6957	1.70385e-11	1.71815e-09	probable calcium-binding protein cml27
Os02g0605900	-3.61103	1.9793e-11	1.98175e-09	chitinase 6-like
Os12g0424700	-3.76597	3.16715e-11	3.11583e-09	cyclin-dependent kinase f-2
Os02g0504700	-4.15407	3.29193e-11	3.22735e-09	-
Os06g0701900	-1.59652	3.35151e-11	3.2653e-09	small auxin up rna1 isoform x3
Os10g0107200	-3.15635	3.57586e-11	3.46957e-09	benzyl alcohol o-benzoyltransferase-like
Os06g0218900	-2.97736	3.59993e-11	3.48096e-09	lmbr1 integral membrane
Os01g0150400	-2.09261	3.86161e-11	3.72125e-09	very-long-chain -3-hydroxyacyl- dehydratase pasticcino 2a-like
Os04g0515900	-3.19693	4.43348e-11	4.24336e-09	nac domain-containing protein 21 22-like
Os07g0158500	-3.11739	4.82279e-11	4.60039e-09	nuclear transcription factor y subunit a-10-like
Os11g0307300	-1.89156	5.0444e-11	4.79558e-09	probable o-methyltransferase 2
Os09g0509500	-1.80103	6.67381e-11	6.28116e-09	acyltransferase-like protein chloroplastic
Os06g0521500	-4.25886	7.1444e-11	6.69975e-09	bacterial-induced peroxidase precursor
Os04g0319800	-2.5777	7.18911e-11	6.69975e-09	7-deoxyloganetin glucosyltransferase
Os11g0278300	-4.00794	7.18975e-11	6.69975e-09	upf0481 protein at3g47200-like
Os04g0452600	-4.98994	7.64058e-11	7.09644e-09	sugar transport protein 5
Os03g0725800	-1.51724	8.40832e-11	7.75846e-09	transcription factor bhlh18-like
Os01g0150500	-3.18172	8.66221e-11	7.96669e-09	very-long-chain -3-hydroxyacyl- dehydratase pasticcino 2a-like
Os05g0149400	-5.09068	1.13719e-10	1.02583e-08	acc oxidase
Os02g0684400	-2.43548	1.31483e-10	1.1823e-08	-
Os04g0556500	-2.73106	1.40897e-10	1.25893e-08	cis-zeatin o-glucosyltransferase 1
Os09g0345300	-2.28522	1.43218e-10	1.27163e-08	probable lrr receptor-like serine threonine-protein kinase at1g07650 isoform x1
Os06g0713800	-3.17058	1.51706e-10	1.34277e-08	alpha partial
Os10g0532300	-2.21979	1.68299e-10	1.48497e-08	heavy metal-associated domain containing expressed
Os09g0367900	-1.46608	1.73976e-10	1.53028e-08	homeobox protein hox-d9
Os05g0127200	-1.49661	1.77282e-10	1.55452e-08	phosphoinositide phospholipase c 2-like
Os01g0140700	-5.17386	1.91962e-10	1.66771e-08	ap2 domain containing protein
Os07g0538300	-3.57332	2.03684e-10	1.76411e-08	receptor-like protein kinase at4g00960
Os05g0231100	-3.25856	2.09431e-10	1.80834e-08	l-type lectin-domain containing receptor kinase -like
Os08g0373000	-3.49883	2.14317e-10	1.84489e-08	disease resistance protein rpm1
Os11g0668650	-4.317	2.15158e-10	1.8465e-08	calmodulin-binding protein 60 a-like isoform x1
Os06g0272850	-5.50658	2.26442e-10	1.93745e-08	protein trichome birefringence-like 19
Os12g0105800	-2.13649	2.78432e-10	2.35375e-08	probable lrr receptor-like serine threonine-protein kinase mrh1
Os05g0455400	-1.4753	2.9547e-10	2.49032e-08	transcription factor ilr3
Os01g0246400	-2.6194	3.07039e-10	2.58013e-08	early light-induced protein
Os01g0878900	-3.31038	3.38662e-10	2.83742e-08	#NAME?
Os01g0221600	-4.46759	3.40685e-10	2.84593e-08	aluminum-activated malate transporter 9-like
Os08g0235600	-5.8301	4.22313e-10	3.47639e-08	disease resistance rpp13-like protein 3
Os07g0637700	-2.42591	4.60268e-10	3.76686e-08	dirigent protein 5-like
Os02g0139400	-1.35259	4.8041e-10	3.92034e-08	squamosa promoter-binding-like protein 3
Os01g0859500	-1.71245	5.39631e-10	4.35328e-08	transcription factor tga2-like isoform x1
Os01g0208400	-1.95948	5.45008e-10	4.38413e-08	Peptide-N4-(N-acetyl-beta-glucosaminyl)asparagine amidase A
Os08g0537200	-5.0453	6.05358e-10	4.84201e-08	-
Os04g0645500	-2.41247	6.33037e-10	5.0491e-08	---
Os11g0669100	-1.99624	6.41661e-10	5.10347e-08	calmodulin-binding protein 60 b isoform x1
Os06g0604200	-1.51167	6.92193e-10	5.47453e-08	phospholipase d alpha 2-like
Os11g0129000	-1.58844	7.25998e-10	5.72585e-08	protein detoxification 21
Os04g0380300	-1.70122	7.2876e-10	5.73163e-08	f-box kelch-repeat protein at1g67480-like
Os10g0422600	-2.50881	7.39054e-10	5.79644e-08	-
Os05g0578600	-1.82742	1.01297e-09	7.79321e-08	polygalacturonase at1g48100-like
Os03g0745000	-1.87592	1.06871e-09	8.15027e-08	heat stress transcription factor a-2c-like
Os07g0663800	-3.21151	1.07092e-09	8.15027e-08	momilactone a synthase-like
Os07g0125500	-3.22948	1.08412e-09	8.22856e-08	pathogenesis-related protein 1-like
Os05g0507300	-1.82281	1.12501e-09	8.51599e-08	calreticulin-3 precursor
Os02g0717600	-1.81963	1.13818e-09	8.59266e-08	uncharacterized protein loc105039469
Os01g0138400	-2.99412	1.19235e-09	8.97763e-08	probable receptor-like protein kinase at1g67000
Os09g0490400	-3.33859	1.31249e-09	9.82593e-08	beta-glucosidase isozyme 2 precursor
Os10g0476300	-2.49154	1.31546e-09	9.82593e-08	casein kinase i-like isoform x1
Os10g0511200	-4.54962	1.3709e-09	1.0213e-07	cytochrome p450 89a2-like
Os01g0947833	-3.10292	1.44544e-09	1.074e-07	uncharacterized protein loc4327628
Os01g0788400	-2.92604	1.71568e-09	1.25667e-07	pectin esterase
Os03g0235000	-2.71946	1.75618e-09	1.28128e-07	peroxidase n-like
Os07g0643100	-1.97752	1.96996e-09	1.42256e-07	probable carboxylesterase 18
Os08g0278900	-1.35245	1.99246e-09	1.43513e-07	stromal cell-derived factor 2-like protein
Os04g0659200	-3.04458	2.14564e-09	1.54153e-07	retrotransposon unclassified
Os01g0652375	-3.06558	2.45024e-09	1.7559e-07	phospholipase a1-ii 1
Os01g0609900	-1.59179	2.56235e-09	1.83159e-07	abc transporter g family member 37
Os10g0537800	-4.49823	3.0268e-09	2.15269e-07	aspartic proteinase nepenthesin-1-like
Os12g0582000	-2.9372	3.07406e-09	2.1699e-07	cytochrome p450 81d11-like
Os09g0471500	-3.5655	3.08513e-09	2.17229e-07	wall-associated receptor kinase-like 16
Os02g0646200	-1.63213	3.13521e-09	2.20206e-07	b-box zinc finger protein 20-like
Os03g0790700	-2.93988	3.33914e-09	2.33947e-07	aldehyde oxidase expressed
Os06g0248300	-5.0099	3.38118e-09	2.36306e-07	uncharacterized protein loc102717625
Os05g0400200	-3.60343	3.7169e-09	2.57854e-07	endo- -beta-d-glucanase
Os07g0575900	-2.77239	3.929e-09	2.719e-07	-
Os03g0431100	-1.4967	4.0218e-09	2.77642e-07	Os03g0431100, partial [Oryza sativa Japonica Group]
Os06g0288300	-3.6776	4.32393e-09	2.97046e-07	udp-glycosyltransferase 708a6
Os10g0516100	-2.50756	4.49103e-09	3.07777e-07	glycine cleavage system h mitochondrial
Os07g0559700	-1.29444	4.82912e-09	3.30146e-07	sugar carrier protein c
Os05g0102800	-1.61981	4.94394e-09	3.36366e-07	protein mei2-like 3 isoform x1
Os10g0320100	-2.86041	5.75946e-09	3.8811e-07	flavonoid 3 -hydroxylase
Os02g0114200	-1.44929	5.91011e-09	3.9678e-07	serine carboxypeptidase 3
Os11g0644000	-4.43408	5.91622e-09	3.9678e-07	receptor-like cytosolic serine threonine-protein kinase rbk2
Os12g0263000	-2.32691	6.38994e-09	4.26525e-07	glutathione chloroplastic-like
Os04g0594100	-2.25272	6.77251e-09	4.50995e-07	myb-related protein zm1-like
Os02g0198700	-2.19484	7.16114e-09	4.74636e-07	subtilisin-like protease
Os11g0274700	-4.03598	7.24816e-09	4.79278e-07	tsn1
Os02g0758000	-1.2679	7.71994e-09	5.08094e-07	kda heat shock mitochondrial
Os01g0607200	-1.41824	7.88499e-09	5.1775e-07	amino-acid permease bat1 homolog isoform x1
Os04g0452700	-1.54397	8.30134e-09	5.43824e-07	sugar transport protein 5
Os08g0376500	-1.68463	8.55522e-09	5.59159e-07	patatin-like protein 2
Os11g0141100	-2.74069	8.58791e-09	5.59999e-07	sulfotransferase domain containing protein
Os07g0603800	-1.42032	8.72996e-09	5.6795e-07	protein nrt1 ptr family -like
Os11g0529900	-2.82575	8.90613e-09	5.7808e-07	bisdemethoxycurcumin synthase-like
Os09g0330700	-3.34207	9.22972e-09	5.97017e-07	protein accelerated cell death 6-like
Os01g0787600	-1.82907	9.24017e-09	5.97017e-07	salicylic acid-binding protein 2-like
Os05g0114700	-1.49316	1.07977e-08	6.95398e-07	transcription factor myb48
Os05g0557400	-2.24959	1.08121e-08	6.95398e-07	macpf domain-containing protein nsl1
Os12g0228650	-4.17795	1.16404e-08	7.44889e-07	low quality protein: jacalin-related lectin 35
Os08g0111200	-1.54161	1.16607e-08	7.44889e-07	non-lysosomal glucosylceramidase isoform x1
Os01g0179600	-2.51918	1.42097e-08	8.97561e-07	cyanidin 3-o-rutinoside 5-o-glucosyltransferase-like
Os02g0247100	-1.31956	1.46635e-08	9.24158e-07	bzip transcription factor superfamily protein
Os10g0550800	-3.42163	1.48159e-08	9.31687e-07	-
Os01g0676900	-1.57821	1.55e-08	9.7254e-07	uncharacterized protein loc4325520 isoform x2
Os07g0617000	-1.35668	1.5989e-08	1.001e-06	ethylene-responsive transcription factor 1-like
Os06g0291800	-3.30978	1.61463e-08	1.00861e-06	embryogenesis transmembrane protein
Os03g0784700	-1.24483	1.72659e-08	1.07169e-06	ferredoxin--nadp root chloroplastic
Os03g0247200	-1.43655	1.727e-08	1.07169e-06	-
Os01g0868600	-3.26333	1.73103e-08	1.07183e-06	aspartic proteinase nepenthesin-1-like
Os01g0175100	-1.80825	1.739e-08	1.07441e-06	homeobox even-skipped homolog protein 2
Os02g0152400	-2.09119	1.74937e-08	1.07846e-06	ribulose bisphosphate carboxylase small chain clone 512-like
Os06g0294200	-2.35099	1.86707e-08	1.14353e-06	embryogenesis transmembrane
Os01g0588100	-1.66547	1.9686e-08	1.2031e-06	hypersensitive-induced response protein 1
Os03g0121300	-1.19606	1.9981e-08	1.21849e-06	peroxidase 5-like
Os11g0227800	-3.67821	2.34296e-08	1.41052e-06	disease resistance protein rpm1
Os04g0452100	-1.90184	2.46419e-08	1.47408e-06	cryptochrome-1 isoform x2
Os01g0947700	-1.45324	2.84333e-08	1.6937e-06	beta glucanase
Os07g0650600	-2.64965	2.86506e-08	1.69947e-06	ble2 protein
Os01g0947800	-2.87006	3.05647e-08	1.80921e-06	probable disease resistance protein at5g45440
Os05g0473000	-4.65923	3.1932e-08	1.87911e-06	abscisic acid receptor pyl4-like
Os12g0290100	-1.22662	3.28535e-08	1.92852e-06	serine threonine-protein kinase tricorner-like
Os11g0226933	-2.4269	3.48646e-08	2.03711e-06	disease resistance protein rpm1
Os01g0850900	-1.91692	3.49198e-08	2.03711e-06	heme-binding-like protein chloroplastic
Os07g0245200	-1.25829	3.75727e-08	2.17837e-06	probable polygalacturonase
Os02g0211100	-3.97827	3.77625e-08	2.18488e-06	Os02g0211100, partial [Oryza sativa Japonica Group]
Os11g0557500	-1.81828	3.80587e-08	2.19752e-06	lysm domain receptor-like kinase 4
Os04g0461400	-1.23325	3.83385e-08	2.20916e-06	mads-box transcription factor 27-like
Os11g0559200	-2.68016	4.05925e-08	2.33428e-06	receptor kinase-like protein
Os04g0172400	-4.15916	4.07963e-08	2.34123e-06	benzyl alcohol o-benzoyltransferase-like
Os01g0652300	-4.00407	4.15688e-08	2.38072e-06	phospholipase a1-ii 1
Os08g0203150	-2.51485	4.19638e-08	2.39848e-06	probable lrr receptor-like serine threonine-protein kinase at1g56140
Os03g0238300	-1.47126	4.42813e-08	2.51566e-06	type i inositol- -trisphosphate 5-phosphatase cvp2
Os03g0205800	-2.11216	4.45523e-08	2.52597e-06	probable n-acetyltransferase hls1
Os01g0638600	-2.17554	4.52414e-08	2.5599e-06	scopoletin glucosyltransferase-like
Os02g0807900	-2.70073	4.59625e-08	2.5955e-06	wall-associated receptor kinase 2
Os01g0609000	-1.7407	4.62498e-08	2.60244e-06	abc transporter g family member 36
Os10g0499600	-1.45959	4.62696e-08	2.60244e-06	-
Os01g0547600	-2.77116	4.64126e-08	2.60529e-06	high affinity nitrate transporter
Os03g0244950	-1.76744	5.27582e-08	2.9428e-06	chaperone protein dnaj chloroplastic-like
Os05g0228000	-3.67341	5.6177e-08	3.12236e-06	bark storage protein a
Os04g0308400	-1.79139	5.76061e-08	3.1955e-06	23 kDa jasmonate-induced protein
Os07g0538350	-2.48326	6.15741e-08	3.38238e-06	cysteine-rich receptor-like protein kinase 25
Os04g0109100	-4.55636	6.17992e-08	3.38816e-06	probable l-type lectin-domain containing receptor kinase
Os01g0273800	-1.66915	6.43105e-08	3.50542e-06	probable indole-3-pyruvate monooxygenase yucca10
Os11g0676500	-2.39809	6.77729e-08	3.67994e-06	disease resistance rpp13-like protein 4
Os01g0663051	-3.72657	6.82309e-08	3.69408e-06	protein radialis-like 3
Os06g0505700	-1.48651	6.82949e-08	3.69408e-06	arabinogalactan peptide 16-like
Os02g0585200	-7.21132	6.90136e-08	3.72581e-06	uncharacterized protein loc4329806
Os02g0763000	-1.28616	7.314e-08	3.93517e-06	cell number regulator 1
Os01g0305200	-3.51654	7.31702e-08	3.93517e-06	-
Os12g0637000	-3.90546	7.3969e-08	3.97056e-06	purple acid phosphatase 2-like
Os12g0441600	-3.21719	7.46435e-08	3.99916e-06	o-methyltransferase zrp4
Os04g0506800	-2.88259	7.74333e-08	4.14078e-06	sialyltransferase-like protein 3
Os09g0540800	-2.02864	7.76418e-08	4.14407e-06	protein fd-like
Os10g0536400	-1.42921	7.8623e-08	4.17846e-06	2og-fe oxygenase family expressed
Os02g0808800	-4.09893	7.873e-08	4.17846e-06	cinnamoyl reductase
Os11g0694100	-2.94019	7.89632e-08	4.18297e-06	wall-associated protein kinase
Os09g0544000	-1.32551	8.54081e-08	4.50747e-06	agmatine coumaroyltransferase-2-like
Os01g0541800	-1.20677	9.24269e-08	4.8507e-06	bidirectional sugar transporter sweet2a-like isoform x1
Os06g0233800	-1.78018	9.40684e-08	4.92768e-06	transcription factor bhlh155-like
Os08g0203100	-2.15159	9.7432e-08	5.09443e-06	receptor-like serine threonine kinase
Os07g0589000	-2.35331	1.00423e-07	5.2411e-06	LOB domain-containing protein 37
Os02g0640300	-2.10604	1.01588e-07	5.29215e-06	membrane steroid-binding protein 2
Os07g0518100	-1.56101	1.06452e-07	5.52512e-06	cytochrome p450 716b1-like
Os04g0445000	-1.97095	1.08535e-07	5.62292e-06	potassium channel kor2
Os05g0105000	-1.51522	1.10799e-07	5.72968e-06	methionine s-methyltransferase
Os08g0407600	-1.26042	1.12791e-07	5.82202e-06	uncharacterized protein loc4345537
Os11g0224900	-1.22376	1.13271e-07	5.83613e-06	nbs-lrr type partial
Os02g0465600	-2.2715	1.13534e-07	5.8384e-06	F-box/kelch-repeat protein At1g23390
Os08g0200750	-3.85885	1.13728e-07	5.8384e-06	nac domain-containing protein 21 22
Os03g0375966	-3.5775	1.15238e-07	5.90515e-06	probable polyamine transporter at3g13620
Os07g0432800	-1.67347	1.18121e-07	6.04194e-06	transcription factor myb21 isoform x1
Os05g0583600	-1.33594	1.3278e-07	6.73047e-06	ovate protein
Os03g0252900	-3.14377	1.33012e-07	6.73047e-06	protein radialis-like 3
Os06g0603000	-1.38631	1.39763e-07	7.05941e-06	heme oxygenase 1
Os01g0562400	-1.39255	1.43409e-07	7.21773e-06	70 kda peptidyl-prolyl isomerase-like
Os07g0178800	-2.28822	1.46503e-07	7.33424e-06	early light-induced protein
Os04g0162701	-1.59084	1.48225e-07	7.39686e-06	-
Os06g0297400	-1.75678	1.4948e-07	7.44369e-06	uncharacterized protein loc9269758 isoform x1
Os03g0113000	-1.27164	1.51972e-07	7.54115e-06	probable receptor-like protein kinase at4g10390
Os04g0649600	-1.98536	1.53433e-07	7.57849e-06	uncharacterized protein loc4337220
Os04g0406600	-1.36561	1.66256e-07	8.19241e-06	arogenate dehydratase prephenate dehydratase chloroplastic-like
Os10g0453900	-1.9419	1.71195e-07	8.41344e-06	-
Os02g0242100	-2.40526	1.83856e-07	8.99684e-06	hydroquinone glucosyltransferase
Os10g0528300	-1.5791	1.89058e-07	9.21945e-06	probable glutathione s-transferase gstu6
Os01g0249700	-3.09815	1.90062e-07	9.25244e-06	uncharacterized protein loc107277158
Os05g0258400	-2.7248	1.91479e-07	9.30536e-06	probable lrr receptor-like serine threonine-protein kinase at1g56140 isoform x3
Os10g0573800	-1.14719	1.98568e-07	9.61674e-06	mitochondrial carnitine acylcarnitine carrier-like protein
Os01g0704100	-2.87466	2.01126e-07	9.72394e-06	high-affinity nitrate transporter
Os02g0720600	-1.71792	2.05174e-07	9.88582e-06	aspartic proteinase nepenthesin-2
Os06g0222400	-1.24221	2.11418e-07	1.0152e-05	ap2 erebp transcription factor superfamily protein
Os06g0203200	-1.18434	2.21181e-07	1.06028e-05	probable flavin-containing monooxygenase 1
Os01g0646800	-1.25727	2.25569e-07	1.07931e-05	uncharacterized protein loc4333472 isoform x1
Os01g0208700	-1.62379	2.25916e-07	1.07931e-05	phosphoenolpyruvate carboxylase
Os03g0308800	-1.33404	2.32424e-07	1.10853e-05	protein high chlorophyll fluorescent 107
Os12g0124100	-1.21666	2.40897e-07	1.14507e-05	rp3-like disease resistance protein
Os01g0194600	-1.20696	2.4852e-07	1.17734e-05	grx_a2 - glutaredoxin subgroup iii
Os06g0282000	-2.84906	2.53882e-07	1.20073e-05	udp-glycosyltransferase 89b1
Os07g0539100	-2.1885	2.58171e-07	1.21897e-05	beta- -glucanase
Os03g0609500	-2.04067	2.72641e-07	1.28515e-05	LOB domain-containing protein 37
Os08g0531100	-1.45793	2.81613e-07	1.32302e-05	65-kda microtubule-associated protein 8
Os03g0265666	-1.75403	2.83872e-07	1.33141e-05	-
Os03g0800000	-1.42083	2.90007e-07	1.35793e-05	uncharacterized protein loc4334447
Os03g0365800	-4.14323	3.06216e-07	1.42909e-05	gdsl esterase lipase at1g28600-like
Os03g0314500	-2.92981	3.09623e-07	1.44261e-05	-
Os04g0194500	-1.29406	3.11686e-07	1.44507e-05	abc transporter g family member 28-like
Os08g0189200	-1.87431	3.13602e-07	1.45157e-05	germin protein type 1
Os04g0308600	-1.16872	3.19637e-07	1.47708e-05	uncharacterized protein loc4335443
Os03g0112900	-4.03259	3.30317e-07	1.52267e-05	cytochrome p450 84a1
Os04g0223901	-2.61319	3.30582e-07	1.52267e-05	probable flavin-containing monooxygenase 1
Os05g0187100	-1.50965	3.3184e-07	1.52598e-05	hxk7_orysj ame: full=hexokinase-7 ame: full=hexokinase-6
Os01g0933900	-2.59976	3.39688e-07	1.55953e-05	glutathione s-transferase 3
Os04g0140666	-1.256	3.40405e-07	1.56028e-05	protein kinase
Os06g0534800	-2.11536	3.4113e-07	1.56107e-05	ring finger protein
Os02g0695600	-1.49954	3.55668e-07	1.61972e-05	uncharacterized protein loc4330398
Os09g0502500	-2.12806	3.63143e-07	1.64845e-05	quinone-oxidoreductase chloroplastic
Os12g0183100	-1.27067	3.70562e-07	1.67533e-05	2-oxoisovalerate dehydrogenase subunit alpha mitochondrial isoform x1
Os04g0311400	-1.91742	3.70846e-07	1.67533e-05	cysteine proteinase 1
Os04g0616500	-1.11238	3.74647e-07	1.6898e-05	probable lrr receptor-like serine threonine-protein kinase at1g56140
Os12g0159000	-1.30513	3.94534e-07	1.77101e-05	protein yls9-like
Os09g0526700	-4.15703	4.20561e-07	1.88164e-05	udp-glucose 4-epimerase
Os10g0109600	-1.6176	4.21177e-07	1.88164e-05	peroxidase n-like
Os03g0137600	-1.15613	4.38711e-07	1.95687e-05	gata zinc finger domain-containing protein 10
Os06g0323100	-7.10492	4.39559e-07	1.95756e-05	jasmonate o-methyltransferase
Os04g0453233	-1.97865	4.46063e-07	1.9834e-05	sugar transport protein 5
Os01g0750500	-1.41297	4.4792e-07	1.98852e-05	Coiled-coil domain-containing protein 25
Os12g0567300	-2.73857	4.65761e-07	2.06448e-05	myb family transcription expressed
Os03g0252100	-1.3527	4.69554e-07	2.07478e-05	probable carboxylesterase 8
Os07g0474600	-1.39155	4.7372e-07	2.08992e-05	cyclopropane synthase
Os10g0552300	-1.69109	5.0613e-07	2.21903e-05	cortical cell-delineating protein
Os01g0216900	-4.00254	5.19258e-07	2.27306e-05	gdsl esterase lipase at5g45910
Os04g0482300	-1.44533	5.26224e-07	2.29999e-05	btb poz and taz domain-containing protein 2-like
Os11g0687001	-1.66045	5.33728e-07	2.32559e-05	disease resistance rpp13-like protein 2 isoform x1
Os12g0191300	-3.611	5.3565e-07	2.33037e-05	probable cysteine desulfurase
Os07g0150100	-1.31968	5.56944e-07	2.41556e-05	csc1-like protein erd4
Os06g0611900	-1.67122	5.63887e-07	2.43818e-05	glycine dehydrogenase mitochondrial
Os07g0538200	-2.0275	5.6894e-07	2.45627e-05	serine threonine-specific protein kinase
Os01g0111100	-4.40446	5.94639e-07	2.55465e-05	peptidyl-prolyl cis-trans isomerase cyp26- chloroplastic
Os03g0224200	-1.14281	5.95345e-07	2.55465e-05	two-component response regulator orr21
Os06g0155500	-1.41488	6.06769e-07	2.59578e-05	3 -n-debenzoyl-2 -deoxytaxol n-benzoyltransferase
Os02g0767200	-1.77944	6.13183e-07	2.61538e-05	uncharacterized protein loc4330842
Os03g0398250	-2.14405	6.15162e-07	2.61726e-05	zinc c3hc4 type family protein
Os06g0169900	-3.49851	6.22149e-07	2.64156e-05	salt gene product
Os10g0542900	-3.00779	6.32079e-07	2.67969e-05	chitinase 8
Os08g0448000	-1.47643	6.41968e-07	2.71754e-05	probable 4-coumarate-- ligase 5
Os06g0721800	-2.12297	6.44628e-07	2.72471e-05	blue copper binding
Os08g0157600	-1.08003	6.57899e-07	2.77665e-05	protein lhy isoform x1
Os06g0641066	-2.40551	6.77085e-07	2.84911e-05	cytochrome p450
Os12g0639600	-1.09066	7.05996e-07	2.96193e-05	hipl1 protein
Os05g0153300	-3.0125	7.22377e-07	3.02616e-05	uncharacterized protein loc4337839
Os04g0597800	-1.57609	7.6471e-07	3.1893e-05	protein nrt1 ptr family -like
Os01g0185900	-1.6641	7.75163e-07	3.22813e-05	probable wrky transcription factor 72
Os05g0579600	-1.59658	7.96822e-07	3.30979e-05	homolog subfamily c member 2
Os10g0380800	-4.35163	7.99368e-07	3.30979e-05	tyrosine decarboxylase 1-like
Os01g0302500	-4.35163	7.9946e-07	3.30979e-05	homeobox protein knotted-1-like 1
Os11g0126900	-2.1476	8.18635e-07	3.37926e-05	nac domain transcription expressed
Os11g0109500	-1.78247	8.3634e-07	3.44731e-05	probable staphylococcal-like nuclease can2
Os05g0548900	-1.12503	8.71118e-07	3.5802e-05	phosphoethanolamine n-methyltransferase 1-like
Os07g0421300	-2.4937	8.74381e-07	3.58839e-05	alpha-glucosidase 2
Os07g0677300	-1.46935	9.92964e-07	4.05149e-05	peroxidase
Os01g0850800	-3.86269	9.99889e-07	4.07386e-05	lac8_orysj ame: full=laccase-8 ame: full=benzenediol:oxygen oxidoreductase 8 ame: full=diphenol oxidase 8 ame: full=urishiol oxidase 8 flags: precursor
Os02g0574600	-1.28201	1.05471e-06	4.28377e-05	-
Os07g0622000	-1.62423	1.05596e-06	4.28377e-05	serine threonine-protein kinase sapk2
Os11g0102200	-1.92784	1.10961e-06	4.48211e-05	nonphototropic hypocotyl protein expressed
Os09g0246300	-4.03982	1.11939e-06	4.51516e-05	Os09g0246300, partial [Oryza sativa Japonica Group]
Os07g0611200	-6.6185	1.13176e-06	4.55838e-05	chp-rich zinc finger
Os01g0173600	-1.88255	1.13334e-06	4.55838e-05	lactoylglutathione lyase
Os11g0678000	-1.46227	1.14698e-06	4.60667e-05	serine threonine-protein kinase ctr1
Os06g0125500	-1.49865	1.18158e-06	4.72549e-05	oligopeptide transporter 7
Os02g0682300	-4.22743	1.19666e-06	4.77901e-05	ring-h2 finger protein atl2l
Os01g0249100	-3.36948	1.20436e-06	4.78946e-05	expansin os-expa3
Os11g0607200	-1.2943	1.20921e-06	4.80199e-05	probable lrr receptor-like serine threonine-protein kinase at5g10290
Os03g0344232	-2.54076	1.23687e-06	4.89805e-05	universal stress protein family expressed
Os08g0402001	-6.50395	1.25695e-06	4.9567e-05	uncharacterized protein loc107276925
Os09g0127300	-2.15232	1.2924e-06	5.08232e-05	cinnamoyl- reductase
Os11g0227200	-2.57601	1.31021e-06	5.13801e-05	disease resistance protein rpm1
Os12g0111800	-2.85267	1.34951e-06	5.28479e-05	cationic peroxidase 1-like
Os01g0623200	-1.86625	1.3673e-06	5.33967e-05	s-type anion channel slah2-like
Os06g0180100	-1.36159	1.4226e-06	5.53264e-05	-
Os01g0725400	-1.13339	1.43635e-06	5.57844e-05	casp-like protein 3a1
Os06g0662200	-1.20237	1.48571e-06	5.75434e-05	basic leucine zipper 9
Os01g0367400	-2.72022	1.4912e-06	5.76769e-05	uncharacterized protein loc4325729 isoform x2
Os12g0433700	-1.7152	1.63546e-06	6.29119e-05	-
Os10g0550900	-2.35997	1.64576e-06	6.31467e-05	proline dehydrogenase mitochondrial-like
Os01g0522400	-6.84838	1.64604e-06	6.31467e-05	ble2 protein
Os03g0187800	-1.20075	1.68798e-06	6.45799e-05	purine permease 3-like
Os03g0405500	-1.08947	1.70705e-06	6.51661e-05	probable nucleoredoxin 1-1
Os11g0590900	-2.97165	1.70791e-06	6.51661e-05	disease resistance rpp13-like protein 3
Os02g0176000	-1.37051	1.7744e-06	6.74366e-05	b-box zinc finger protein 32-like
Os11g0250600	-4.03629	1.77573e-06	6.74366e-05	ankyrin repeat-containing protein at5g02620
Os02g0300700	-1.22106	1.78295e-06	6.75728e-05	eukaryotic translation initiation factor 1a
Os03g0673700	-1.88926	1.78781e-06	6.76659e-05	uncharacterized protein loc100278494
Os02g0661100	-1.63331	1.83577e-06	6.93883e-05	probable trehalose-phosphate phosphatase 1
Os11g0469900	-3.15354	1.8858e-06	7.1184e-05	protein
Os03g0733900	-2.06417	2.03509e-06	7.64107e-05	-
Os03g0144300	-1.17242	2.0523e-06	7.69544e-05	xyloglucan galactosyltransferase katamari1 homolog
Os09g0341600	-2.92235	2.14818e-06	8.03361e-05	uncharacterized protein loc4346787
Os02g0782900	-3.24844	2.18368e-06	8.15558e-05	uncharacterized protein loc4330937
Os06g0605900	-1.01555	2.19815e-06	8.18798e-05	ein3-binding f-box protein 1
Os04g0102700	-1.34532	2.21223e-06	8.22954e-05	fatty acid amide hydrolase isoform x1
Os11g0649500	-2.66124	2.235e-06	8.30333e-05	casp-like protein 1u3
Os06g0676600	-2.14025	2.25454e-06	8.36492e-05	serine threonine-protein kinase
Os02g0597700	-1.15395	2.26651e-06	8.39828e-05	bag family molecular chaperone regulator 1-like
Os03g0133500	-2.65701	2.36764e-06	8.76152e-05	probable acyl-activating enzyme peroxisomal
Os03g0323600	-1.67169	2.38239e-06	8.80456e-05	-
Os03g0238600	-1.05094	2.44544e-06	9.00222e-05	purple acid phosphatase 3
Os07g0573900	-1.42794	2.51174e-06	9.21027e-05	Os07g0573900, partial [Oryza sativa Japonica Group]
Os01g0138800	-3.36655	2.53717e-06	9.29143e-05	protein isoform x2
Os11g0537375	-1.27319	2.5918e-06	9.46694e-05	respiratory burst oxidase homolog protein b
Os10g0391400	-2.0229	2.60969e-06	9.51998e-05	zim motif family protein
Os10g0333700	-3.11312	2.64206e-06	9.62562e-05	dirigent protein 1
Os04g0686650	-1.07791	2.6902e-06	9.78838e-05	serine threonine-protein kinase sty8 isoform x1
Os01g0760000	-2.13059	2.71232e-06	9.85615e-05	dynein light chain flagellar outer arm
Os03g0251800	-1.5972	2.78661e-06	0.000101131	transcription initiation factor iif subunit alpha-like
Os11g0121000	-1.21881	2.7907e-06	0.000101149	protein lurp-one-related 5-like
Os04g0162800	-2.53319	2.80784e-06	0.00010164	uncharacterized protein loc9270447
Os11g0691300	-1.31413	2.83332e-06	0.000102431	protein kinase
Os03g0233900	-1.67805	2.91742e-06	0.000105202	hemoglobin 1
Os11g0556132	-4.49821	2.93457e-06	0.000105624	probable serine threonine-protein kinase ddb_g0271682
Os01g0725800	-1.05164	2.93659e-06	0.000105624	protein spa1-related 4
Os10g0535800	-3.04313	2.98351e-06	0.000106903	uncharacterized protein loc4349235
Os01g0827800	-6.96555	2.98837e-06	0.000106941	pyrabactin resistance 1-like 5
Os10g0159800	-2.80059	3.00364e-06	0.000107352	alcohol dehydrogenase-like 4
Os03g0101500	-1.14716	3.0894e-06	0.000109861	-
Os06g0554800	-1.18959	3.17623e-06	0.000112492	abc transporter g family member 42
Os12g0106300	-1.03537	3.17933e-06	0.000112492	protein trichome birefringence-like 34
Os07g0124900	-8.33118	3.26691e-06	0.000115446	pathogenesis-related protein 1-like
Os12g0438600	-1.48436	3.32118e-06	0.000117217	chloride channel protein clc-a-like
Os09g0311600	-2.1503	3.54594e-06	0.000124837	disease resistance protein rps2-like isoform x3
Os01g0646700	-1.05186	3.58336e-06	0.000125841	atp-dependent dna helicase pif1-like
Os04g0111100	-1.98615	3.8024e-06	0.000133104	disease resistance protein rga2-like
Os02g0693500	-1.38564	3.80433e-06	0.000133104	uncharacterized membrane protein at4g09580
Os04g0368000	-2.73349	3.81667e-06	0.000133371	wall-associated receptor kinase 2-like
Os04g0556000	-1.37821	3.84117e-06	0.000134061	probable copper-transporting atpase hma5
Os07g0538700	-1.42905	3.85573e-06	0.000134403	receptor-like protein kinase at4g00960
Os11g0244100	-6.31374	3.88802e-06	0.000135029	uncharacterized acetyltransferase at3g50280-like
Os12g0437800	-2.60439	3.89846e-06	0.000135225	mpi
Os10g0112600	-1.01874	4.03671e-06	0.000139848	phagocytic receptor 1b
Os09g0324400	-2.13096	4.16645e-06	0.00014399	uncharacterized protein loc4346731
Os01g0651932	-1.29411	4.33712e-06	0.000149522	protein chloroplastic-like
Os09g0353400	-3.3665	4.34339e-06	0.000149556	s-norcoclaurine synthase 1
Os12g0152900	-2.03389	4.37512e-06	0.000150465	transcription factor tga6-like
Os06g0577350	-2.10976	4.40077e-06	0.000151163	disease resistance rpp13-like protein 2
Os06g0196600	-2.30062	4.49357e-06	0.000154163	3-oxoacyl-
Os12g0210500	-1.6107	4.50228e-06	0.000154274	hypothetical protein OsJ_35572 [Oryza sativa Japonica Group]
Os03g0738400	-1.27941	4.51403e-06	0.000154489	serine mitochondrial
Os03g0769500	-2.19154	4.72563e-06	0.00016134	probable calcium-binding protein cml41
Os03g0835150	-1.15817	4.82889e-06	0.000164468	-
Os06g0725000	-1.08126	4.88248e-06	0.000165893	thiosulfate sulfurtransferase chloroplastic-like
Os03g0418700	-1.15541	4.93388e-06	0.000167237	protein longifolia 2-like
Os04g0460350	-1.80767	4.98415e-06	0.000168738	uncharacterized protein loc103985441
Os05g0355800	-2.37243	5.00504e-06	0.000169242	lipoxygenase 5
Os04g0611200	-3.31749	5.01884e-06	0.00016933	protein eceriferum 26-like
Os06g0153000	-2.64442	5.01964e-06	0.00016933	-
Os10g0454200	-1.12971	5.09225e-06	0.000171166	-
Os02g0744700	-1.79295	5.18152e-06	0.000173753	soluble starch synthase ii-2
Os09g0428300	-1.8393	5.19009e-06	0.000173834	glutamate receptor -like
Os05g0261700	-4.01595	5.27239e-06	0.000176381	probable lrr receptor-like serine threonine-protein kinase at1g56130
Os07g0437500	-1.15668	5.35736e-06	0.0001788	tyrosine decarboxylase 1
Os10g0131100	-1.494	5.51945e-06	0.000183776	disease resistance protein rga4
Os02g0120100	-2.41332	5.56666e-06	0.000185129	serine threonine-protein kinase ht1-like isoform x1
Os01g0719900	-3.07856	5.69905e-06	0.000189004	gdsl esterase lipase at4g10955-like
Os02g0181900	-1.11103	5.70326e-06	0.000189004	chaperone protein mitochondrial
Os02g0743500	-1.02806	5.81738e-06	0.00019256	serine threonine-protein kinase edr1-like
Os06g0292100	-1.45287	5.83654e-06	0.000192968	uncharacterized protein loc4340793
Os02g0206700	-3.61054	6.00166e-06	0.000197733	udp-glycosyltransferase 73c3
Os02g0196600	-1.00651	6.03411e-06	0.000198339	probable copper-transporting atpase hma5
Os01g0606000	-3.12785	6.21687e-06	0.000203871	bidirectional sugar transporter sweet6b
Os04g0634700	-1.2685	6.27018e-06	0.000205381	diacylglycerol kinase 5-like
Os09g0471100	-1.4282	6.29616e-06	0.000205993	peroxidase 17
Os03g0809000	-3.22713	6.33926e-06	0.000207163	dirigent protein 4-like
Os01g0104200	-3.05097	6.35085e-06	0.000207302	nac transcription factor 29
Os10g0547500	-2.63331	6.6008e-06	0.000214716	transporter arsb
Os05g0519200	-1.12319	6.61494e-06	0.000214929	protein kinase
Os01g0383700	-1.26812	6.66908e-06	0.000216439	LEC14B protein
Os04g0621100	-1.39363	6.82801e-06	0.000220835	-
Os03g0299800	-2.07398	7.02305e-06	0.000226883	uncharacterized protein loc4332562
Os01g0704000	-3.56575	7.09332e-06	0.000228719	uncharacterized protein loc103636216
Os04g0581000	-2.10392	7.09609e-06	0.000228719	-oxoglutarate 3-dioxygenase-like
Os06g0128700	-1.92226	7.17896e-06	0.000231127	probable e3 ubiquitin-protein ligase xbos36
Os04g0598800	-2.3656	7.63479e-06	0.000244964	wall-associated receptor kinase 5
Os01g0332800	-2.0254	7.86583e-06	0.000251805	serine carboxypeptidase-like 33 isoform x1
Os01g0249050	-3.09565	8.02554e-06	0.000256336	expansin os-expa3
Os10g0530200	-1.88416	8.17683e-06	0.000260873	probable glutathione s-transferase gstu6
Os09g0274900	-1.45176	8.34222e-06	0.000265849	-
Os09g0400400	-4.1157	8.39575e-06	0.000266953	cinnamyl alcohol dehydrogenase
Os07g0573000	-1.16265	8.82665e-06	0.000279395	-
Os03g0231600	-2.71155	8.99158e-06	0.000283979	branched-chain-amino-acid aminotransferase chloroplast expressed
Os11g0131900	-1.60284	9.14914e-06	0.00028831	alpha-l-arabinofuranosidase c-terminus family expressed
Os11g0686900	-1.23701	9.591e-06	0.000300847	disease resistance rpp13-like protein 2 isoform x1
Os02g0520100	-1.47802	9.61163e-06	0.000300847	nudix hydrolase 13
Os09g0358000	-3.38467	9.65968e-06	0.000301705	probable lrr receptor-like serine threonine-protein kinase at1g51810
Os04g0490000	-1.88061	9.78735e-06	0.000304681	protoporphyrinogen chloroplastic mitochondrial
Os03g0255500	-1.49001	9.88444e-06	0.000307286	phosphoenolpyruvate carboxykinase
Os01g0132000	-1.41376	9.89279e-06	0.000307286	wound-induced serine protease inhibitor
Os11g0241200	-2.42829	1.02319e-05	0.000316427	-
Os01g0631200	-1.10773	1.02566e-05	0.000316844	uroporphyrinogen-iii c-methyltransferase
Os02g0137700	-1.4835	1.04799e-05	0.000322332	uncharacterized protein loc4328240
Os02g0318100	-2.77876	1.06125e-05	0.000325066	ubiquinol oxidase mitochondrial
Os09g0424200	-2.90164	1.08024e-05	0.000329381	glutamine amidotransferase ylr126c
Os01g0264600	-1.43714	1.13301e-05	0.000343986	protein phytochrome kinase substrate 4
Os10g0113100	-2.04466	1.14152e-05	0.000345823	probable nad h-dependent oxidoreductase 1
Os08g0156600	-1.14463	1.16424e-05	0.000351576	glycerol-3-phosphate transporter 1
Os01g0795000	-3.21258	1.1718e-05	0.000352782	subtilisin-like protease
Os11g0539200	-1.13892	1.17198e-05	0.000352782	probable xyloglucan endotransglucosylase hydrolase
Os03g0402200	-2.29269	1.17816e-05	0.000354263	-
Os04g0616700	-1.00009	1.18748e-05	0.000356687	probable lrr receptor-like serine threonine-protein kinase at1g56140
Os04g0486950	-1.682	1.19083e-05	0.000357311	malate glyoxysomal
Os12g0623500	-1.37193	1.19859e-05	0.00035926	amino acid permease family expressed
Os02g0574500	-1.50747	1.21024e-05	0.000361985	sugar transport protein 6-like
Os03g0169500	-1.36109	1.21866e-05	0.000363164	probable mannan synthase 4
Os09g0562700	-1.20679	1.22112e-05	0.000363311	thiol protease sen102 precursor
Os04g0121100	-3.12012	1.24565e-05	0.000370221	subtilisin-like protease
Os06g0338801	-3.07109	1.26944e-05	0.000376498	primary amine oxidase
Os07g0680400	-1.43062	1.31573e-05	0.000389001	probable wrky transcription factor 70
Os04g0417800	-1.22335	1.31921e-05	0.000389623	Uncharacterized WD repeat-containing protein C18H10.05
Os04g0308500	-1.29647	1.3308e-05	0.000392636	23 kDa jasmonate-induced protein
Os11g0605500	-1.6399	1.34555e-05	0.000395776	acyl-coenzyme a oxidase peroxisomal
Os12g0203200	-1.27854	1.34565e-05	0.000395776	-
Os03g0399800	-2.03826	1.35957e-05	0.000399453	protein gos9-like
Os07g0664900	-3.02292	1.36623e-05	0.000400993	sex determination protein tasselseed 2
Os02g0648300	-2.24192	1.37998e-05	0.000404608	trihelix transcription factor gtl1-like isoform x1
Os02g0579800	-1.53557	1.39233e-05	0.000406961	cell number regulator 2-like
Os02g0656600	-1.42362	1.41312e-05	0.000412183	dehydration responsive element binding protein 4-2
Os10g0398600	-1.48781	1.443e-05	0.000420032	retrotransposon ty3-gypsy subclass
Os03g0628800	-1.96518	1.45499e-05	0.000423085	uncharacterized protein loc4333506
Os09g0361200	-2.00906	1.53596e-05	0.000445712	hypersensitive-induced response protein 1-like
Os08g0398400	-1.67166	1.65913e-05	0.000477529	hypersensitive-induced response protein 1
Os06g0212100	-1.02478	1.66274e-05	0.000478079	galactoside 2-alpha-l-fucosyltransferase
Os02g0178700	-1.00742	1.66692e-05	0.000478794	uncharacterized protein loc100275784 isoform x1
Os01g0697100	-1.09148	1.67161e-05	0.000479655	anthocyanidin -o-glucosyltransferase
Os05g0167600	-1.09182	1.68108e-05	0.000481881	uncharacterized protein loc4337920
Os03g0317300	-3.74045	1.69516e-05	0.000485425	aspartic proteinase nepenthesin-1-like
Os04g0623800	-1.11582	1.75352e-05	0.000500612	mitochondrial
Os11g0179500	-3.29482	1.76214e-05	0.000502058	dirigent protein 22-like
Os01g0197700	-2.67962	1.78711e-05	0.000507636	cytokinin oxidase dehydrogenase
Os02g0518000	-3.18903	1.81488e-05	0.000515007	-
Os10g0522800	-1.16272	1.8245e-05	0.000516954	hypothetical protein [Oryza sativa Japonica Group]
Os07g0685000	-1.119	1.82866e-05	0.000516954	cyclic dof factor 3-like
Os09g0548400	-1.25479	1.82907e-05	0.000516954	probable flavin-containing monooxygenase 1
Os02g0575800	-3.35651	1.84055e-05	0.00051968	aldose 1-epimerase-like
Os08g0556900	-2.37848	1.85698e-05	0.000523796	thiol protease
Os06g0521400	-3.11585	1.87367e-05	0.000527975	bacterial-induced peroxidase precursor
Os07g0168600	-1.30306	1.89626e-05	0.000533808	glucan endo- -beta-glucosidase 8
Os01g0901500	-1.36417	1.95399e-05	0.000548963	4-coumarate-- ligase-like 5
Os07g0603600	-1.42675	1.97417e-05	0.0005532	methylesterase chloroplastic
Os05g0161800	-2.88696	1.98526e-05	0.000555076	probable gtp diphosphokinase chloroplastic
Os02g0550800	-3.80601	1.99739e-05	0.000557275	ammonium transporter 3 member 3
Os12g0609900	-2.01885	2.00393e-05	0.00055855	F-box protein SKIP19
Os03g0171900	-1.08849	2.04228e-05	0.000568676	alanine--glyoxylate aminotransferase 2 homolog mitochondrial
Os07g0668500	-6.26921	2.06087e-05	0.000573288	protein kinase homolog
Os02g0254600	-1.3592	2.08481e-05	0.000578806	-
Os04g0497700	-2.45527	2.11492e-05	0.000585439	zinc finger protein constans-like 3-like
Os01g0648000	-2.94935	2.13965e-05	0.000591126	potassium channel
Os01g0940000	-2.87508	2.14859e-05	0.000593015	cytokinin dehydrogenase 4
Os07g0672700	-2.50333	2.16885e-05	0.000598023	beta-d-glucosyl crocetin beta- -glucosyltransferase-like
Os04g0491500	-1.29602	2.19934e-05	0.000605246	protein nrt1 ptr family -like isoform x1
Os01g0210600	-1.0427	2.26492e-05	0.000621476	-
Os04g0619000	-2.03033	2.28601e-05	0.000625845	nac domain-containing protein 21 22
Os01g0816600	-1.25929	2.34254e-05	0.000638431	probable leucine-rich repeat receptor-like protein kinase at5g49770
Os06g0549600	-2.07764	2.42838e-05	0.000660022	reticuline oxidase-like protein
Os04g0650700	-1.05613	2.43917e-05	0.000662212	probable isoaspartyl peptidase l-asparaginase 2
Os06g0238700	-2.66613	2.54249e-05	0.000689597	vegetative incompatibility protein het-e-1
Os08g0376550	-1.12805	2.56946e-05	0.000695578	patatin-like protein 2
Os02g0557800	-1.06185	2.61354e-05	0.000704134	response regulator 7
Os12g0628100	-1.0773	2.65411e-05	0.000713702	actin-depolymerizing factor 11
Os09g0240200	-3.14848	2.69264e-05	0.000722687	zinc finger protein constans-like 2-like
Os01g0756900	-1.19042	2.73217e-05	0.000731905	Os01g0756900, partial [Oryza sativa Japonica Group]
Os10g0565150	-1.00887	2.73681e-05	0.000732454	beta-amylase chloroplastic
Os02g0514500	-2.48271	2.75143e-05	0.000735669	glycerophosphodiester phosphodiesterase chloroplastic-like
Os01g0708500	-1.19864	2.77641e-05	0.000741143	lysine decarboxylase-like protein
Os06g0547400	-1.11219	2.77715e-05	0.000741143	peroxidase p7-like
Os10g0474100	-4.35759	2.82739e-05	0.000753125	gmc oxidoreductase family expressed
Os06g0555101	-1.8758	2.83761e-05	0.000755136	abc transporter g family member 42
Os01g0727840	-1.27713	2.87838e-05	0.000765265	subtilisin-like protease
Os11g0242200	-6.21101	2.90435e-05	0.000771443	probable protein phosphatase 2c 74
Os02g0246900	-1.4477	2.93699e-05	0.000779378	-
Os01g0728150	-1.49124	2.99134e-05	0.000792312	hva22-like protein f
Os04g0380200	-1.42266	3.02632e-05	0.000800827	Uncharacterized protein At3g27210
Os02g0574000	-2.55003	3.13597e-05	0.00082829	monosaccharide transporter 1
Os01g0609300	-1.24394	3.1552e-05	0.000832588	abc transporter g family member 36
Os04g0154800	-2.83216	3.18397e-05	0.000838032	uncharacterized protein loc4335030
Os03g0850200	-2.93606	3.18473e-05	0.000838032	4-hydroxyphenylacetaldehyde oxime monooxygenase
Os09g0429400	-1.88661	3.20564e-05	0.000842748	glutamate receptor -like
Os05g0332801	-1.99193	3.22428e-05	0.00084686	adenine guanine permease azg1
Os01g0605700	-3.28465	3.23601e-05	0.000849151	bidirectional sugar transporter sweet6b
Os05g0398800	-1.28756	3.29731e-05	0.000864435	serine threonine-protein kinase cdl1
Os02g0578800	-1.0179	3.47919e-05	0.000904556	ygl010w-like protein
Os08g0122400	-4.64123	3.53215e-05	0.000914695	Uncharacterized protein OsI_009113
Os06g0713000	-1.04188	3.54807e-05	0.000916881	b-box zinc finger protein 20-like
Os05g0382900	-1.53451	3.55861e-05	0.000918439	annexin d3
Os11g0704800	-2.4464	3.58828e-05	0.000925253	rhomboid-like protein 2
Os01g0923000	-1.37514	3.69332e-05	0.000949734	uncharacterized protein loc4327248
Os02g0783625	-1.26412	3.7648e-05	0.000966356	alpha-aminoadipic semialdehyde synthase
Os09g0468000	-1.94693	3.83557e-05	0.000981895	protein detoxification 27-like
Os01g0614900	-1.03095	3.83925e-05	0.000981895	ubiquitin-like modifier-activating enzyme atg7
Os04g0155200	-3.02841	3.90706e-05	0.00099743	grip and coiled-coil domain-containing protein 2
Os11g0226201	-1.626	3.95881e-05	0.00100882	lrr receptor-like serine threonine-protein kinase hsl2
Os04g0688500	-4.40492	4.02786e-05	0.00102549	cationic peroxidase spc4
Os01g0284500	-1.00997	4.07939e-05	0.00103674	germin-like protein 1-1
Os03g0201901	-2.67647	4.09124e-05	0.00103881	endo- -beta-xylanase a-like
Os05g0292800	-1.61113	4.12819e-05	0.00104726	high-light-induced chloroplastic
Os08g0562600	-1.50929	4.15499e-05	0.00105209	protein src2 homolog
Os01g0292200	-1.56196	4.15585e-05	0.00105209	cbl-interacting protein kinase 1
Os12g0614200	-4.4944	4.15842e-05	0.00105209	lipase family protein
Os07g0432566	-2.848	4.18867e-05	0.00105819	-
Os03g0213600	-1.65531	4.25383e-05	0.00106952	-
Os04g0447800	-1.78544	4.38481e-05	0.00109303	glutamate decarboxylase 4-like
Os07g0674500	-1.76325	4.4115e-05	0.00109743	-
Os06g0549300	-2.07307	4.47559e-05	0.0011124	reticuline oxidase-like protein
Os11g0270201	-2.0819	4.59351e-05	0.0011377	probable carnitine racemase - arabidopsis
Os02g0596700	-1.08533	4.61628e-05	0.00114234	btb poz and taz domain-containing protein 1-like
Os04g0358000	-2.42916	4.63078e-05	0.00114409	quinone-oxidoreductase chloroplastic
Os09g0511300	-2.40418	4.66098e-05	0.00114949	-
Os08g0527700	-2.48843	4.66147e-05	0.00114949	protein nrt1 ptr family -like
Os03g0293500	-1.79141	4.66632e-05	0.00114968	pyruvate decarboxylase 2
Os07g0432201	-2.21671	4.69282e-05	0.0011552	-
Os05g0433800	-3.00402	4.88975e-05	0.00120263	uncharacterized protein loc9266784
Os10g0536450	-1.11402	4.97803e-05	0.00122115	2og-fe oxygenase family expressed
Os09g0467200	-1.26677	5.15168e-05	0.00126156	glutathione transferase gst 23-like
Os01g0829100	-1.03444	5.1741e-05	0.00126595	receptor-interacting serine threonine-protein kinase 4-like
Os03g0170701	-1.09382	5.18948e-05	0.0012676	homeobox-leucine zipper protein athb-13-like isoform x2
Os02g0745100	-1.26118	5.20622e-05	0.00127051	aquaporin nip2-1
Os12g0428000	-2.74162	5.22356e-05	0.00127254	-
Os01g0796400	-1.05128	5.31752e-05	0.00129431	3-hydroxybutyryl- dehydrogenase
Os02g0744900	-1.06947	5.33919e-05	0.00129847	geranylgeranyl diphosphate chloroplastic
Os01g0905300	-2.70817	5.40975e-05	0.00131336	leucine zipper
Os10g0361000	-1.75764	5.41777e-05	0.00131418	-
Os08g0549600	-6.49563	5.48817e-05	0.00133012	protein abscisic acid-insensitive 5
Os10g0370500	-1.14422	5.51771e-05	0.00133613	probable glucan -beta-glucosidase a
Os08g0207800	-5.99063	5.58312e-05	0.00135081	aspartic proteinase nepenthesin-1
Os07g0572400	-1.06745	5.59666e-05	0.00135292	uncharacterized protein loc4343675
Os11g0668100	-2.57934	5.60283e-05	0.00135326	disease resistance rpp13-like protein 1
Os06g0354700	-1.2621	5.64899e-05	0.00136324	chloroplastic isoform x1
Os06g0587100	-3.85273	5.75346e-05	0.00138254	Os06g0587100 [Oryza sativa Japonica Group]
Os03g0183500	-1.96754	5.84309e-05	0.0014017	-
Os05g0366000	-1.71576	5.86438e-05	0.00140561	beta-glucosidase 20-like
Os07g0432333	-2.80084	6.09899e-05	0.00145813	-
Os02g0595900	-2.28637	6.16092e-05	0.00147044	high-affinity nitrate transporter-activating
Os03g0181100	-1.49451	6.19366e-05	0.00147576	zim motif family protein
Os08g0121500	-3.92967	6.21347e-05	0.00147881	UPF0481 protein At3g47200
Os06g0185300	-2.92836	6.26433e-05	0.00148883	shikimate o-hydroxycinnamoyltransferase-like
Os03g0255400	-1.10795	6.6622e-05	0.00158073	protein far1-related sequence 7
Os10g0137300	-1.16621	6.67295e-05	0.00158195	-
Os04g0153200	-3.87395	6.69164e-05	0.00158505	uncharacterized protein loc100846771
Os02g0698800	-1.30861	6.7177e-05	0.00158989	probable wrky transcription factor 14
Os07g0251200	-1.42402	6.76788e-05	0.00160043	-
Os08g0101500	-1.27656	6.96229e-05	0.00164341	molybdate transporter 1
Os05g0506600	-2.65297	6.96709e-05	0.00164341	gdsl esterase lipase
Os08g0245200	-1.54039	7.11558e-05	0.00167327	probable 4-coumarate-- ligase 1
Os03g0699800	-1.0131	7.11742e-05	0.00167327	-
Os01g0752500	-1.8867	7.15328e-05	0.00168031	pathogenesis-related genes transcriptional activator pti5-like
Os03g0854000	-1.07619	7.19001e-05	0.00168613	Putative gamma-glutamylcyclotransferase At3g02910
Os07g0112100	-1.18879	7.26326e-05	0.00170048	flavin-containing monooxygenase fmo gs-ox-like 8
Os01g0930400	-3.83709	7.27573e-05	0.00170088	potassium transporter 5
Os05g0550200	-1.47566	7.48676e-05	0.00174846	reticulon-like protein b9
Os10g0158400	-3.05504	7.56395e-05	0.00176357	chalcone synthase
Os12g0117200	-2.41653	7.66305e-05	0.0017852	methylesterase 17-like
Os01g0914700	-4.01366	7.67794e-05	0.0017872	signal peptide peptidase-like 3
Os08g0202400	-1.62718	7.70336e-05	0.00179016	disease resistance protein rpp13-like
Os03g0124900	-2.48716	8.03259e-05	0.00185446	probable polygalacturonase
Os05g0468900	-1.93552	8.05805e-05	0.00185881	ring-h2 finger protein atl66
Os02g0286850	-1.8639	8.1045e-05	0.00186648	inactive disease susceptibility protein lov1 isoform x1
Os01g0134700	-1.71845	8.1772e-05	0.00187998	protein sar deficient 1-like
Os07g0645300	-3.5384	8.18308e-05	0.00187998	uncharacterized protein loc4344094
Os07g0538400	-1.63153	8.23164e-05	0.0018896	serine threonine-specific protein kinase
Os07g0581700	-1.49019	8.24041e-05	0.00189007	homeodomain leucine zipper protein
Os04g0524500	-1.7465	8.46621e-05	0.00193714	probable metal-nicotianamine transporter ysl13
Os01g0521600	-2.82143	8.56284e-05	0.00195608	disease resistance protein rpm1
Os01g0150700	-3.10876	8.62701e-05	0.00196915	-
Os02g0291400	-1.75475	8.68164e-05	0.00197993	calcineurin b-like protein 7
Os05g0360400	-1.72569	8.68827e-05	0.00197993	e3 ubiquitin-protein ligase el5-like
Os08g0356700	-1.98603	8.73829e-05	0.00198812	uncharacterized protein loc4345361
Os03g0297000	-2.25712	8.8056e-05	0.00200182	Uncharacterized protein At5g01610
Os06g0591400	-6.1495	8.85022e-05	0.00201034	-
Os04g0647800	-1.13032	8.92538e-05	0.00202254	glycerol kinase
Os01g0629600	-2.17963	8.99672e-05	0.00203707	serine carboxypeptidase-like 50
Os04g0156200	-1.6639	9.01024e-05	0.00203849	agap002737-pa-like protein
Os06g0133200	-1.60639	9.0443e-05	0.00204456	-
Os04g0666800	-3.21886	9.08761e-05	0.00205271	dirigent-like protein pdir17
Os07g0533300	-3.96237	9.14777e-05	0.00206465	aspartic proteinase nepenthesin-1-like
Os05g0355700	-2.94259	9.21387e-05	0.0020779	glycine-rich cell wall structural protein 1-like
Os06g0691900	-2.69906	9.45056e-05	0.0021228	f-box domain containing protein
Os01g0931000	-1.21609	9.47268e-05	0.00212608	tropinone reductase homolog
Os05g0318700	-1.22415	9.48815e-05	0.00212786	receptor-like protein kinase feronia
Os05g0342100	-6.09403	9.64012e-05	0.0021568	-
Os04g0405900	-1.43661	9.65831e-05	0.00215916	-
Os03g0795300	-1.27055	9.79651e-05	0.00218833	leucine-rich repeat extensin-like protein 6
Os06g0338700	-3.13056	9.95159e-05	0.00221771	primary amine oxidase-like
Os07g0180700	-1.55639	9.97461e-05	0.00222108	protein zinc induced facilitator-like 1-like isoform x1
Os02g0791400	-1.90351	0.000100795	0.00223915	cytochrome c oxidase subunit 6b-1
Os12g0495600	-1.29057	0.000101434	0.0022497	disease resistance rpp13-like protein 3
Os09g0488700	-1.46821	0.000102663	0.00227252	uncharacterized protein loc4347433
Os01g0321900	-2.67574	0.0001027	0.00227252	uncharacterized protein loc107278644
Os03g0132000	-1.08031	0.000102913	0.0022736	4-coumarate-- ligase-like 4
Os02g0273100	-1.48657	0.000102991	0.0022736	d-amino-acid chloroplastic-like
Os08g0531000	-1.73776	0.000103313	0.0022771	inactive purple acid phosphatase 27
Os07g0634000	-1.74429	0.000103391	0.0022771	golgi apparatus membrane protein tvp38
Os01g0636500	-1.16261	0.000106788	0.00234096	polygalacturonase precursor
Os08g0465700	-6.09674	0.000107312	0.00234881	cyt-p450 monooxygenase
Os04g0454200	-2.05907	0.000108121	0.0023619	sugar transport protein 5
Os06g0710700	-1.25042	0.000108162	0.0023619	benzyl alcohol o-benzoyltransferase-like
Os01g0934800	-1.36007	0.000108739	0.00237268	pir7b protein
Os05g0134700	-1.2558	0.000109254	0.0023784	peroxidase 2
Os02g0568200	-3.19536	0.000111025	0.00241074	root phototropism protein 3
Os07g0429700	-1.79447	0.000111319	0.00241404	-
Os02g0218800	-2.66372	0.000111546	0.00241711	allene oxide synthase 2-like
Os03g0299200	-2.08536	0.000112962	0.00244405	alcohol partial
Os12g0555200	-3.93247	0.000115324	0.00249133	pathogenesis-related protein
Os08g0155400	-1.08454	0.00011618	0.00250586	protein nrt1 ptr family -like
Os08g0356500	-1.12544	0.000116262	0.00250586	uncharacterized protein loc4345361
Os05g0171900	-1.43781	0.000117266	0.00252556	lactoylglutathione lyase
Os03g0323900	-1.38498	0.000118195	0.00254363	non-specific lipid transfer protein gpi-anchored 2-like
Os02g0770500	-1.46854	0.000119261	0.0025646	probable wrky transcription factor 9
Os03g0641250	-1.87477	0.000120585	0.00258522	cationic amino acid transporter 1-like
Os01g0963000	-3.38007	0.000120912	0.00258797	peroxidase bp1 partial
Os02g0261000	-1.35776	0.000122146	0.00260878	uncharacterized protein loc103710857
Os02g0226801	-2.58901	0.000123079	0.00262671	abscisic acid receptor pyl2
Os04g0480200	-2.47441	0.000123417	0.00262994	high-affinity nitrate transporter-activating
Os05g0128000	-1.46122	0.000123851	0.0026372	trihelix transcription factor gt-3b-like
Os09g0348766	-5.85231	0.000127132	0.00270299	serine threonine-specific receptor protein kinase-like
Os06g0718400	-2.24726	0.000127323	0.00270357	blue copper binding
Os07g0484800	-2.82242	0.000127351	0.00270357	adenine phosphoribosyltransferase 4-like
Os07g0201300	-1.7662	0.000127607	0.00270697	udp-glycosyltransferase 91c1
Os09g0468300	-1.40098	0.000127906	0.00271127	e3 ubiquitin-protein ligase atl6-like
Os08g0250900	-1.04875	0.00012955	0.00274314	chaperone protein
Os07g0686600	-1.36449	0.000129603	0.00274314	-
Os07g0621300	-1.09762	0.000130289	0.00275353	GLABRA2 expression modulator
Os09g0353700	-1.71288	0.000135009	0.00283841	s-norcoclaurine synthase 1
Os05g0534500	-1.08297	0.000137882	0.00288591	copper transport protein atx1
Os07g0663500	-1.48312	0.000141697	0.00294829	momilactone a synthase-like
Os03g0320100	-1.73103	0.000143533	0.00297988	alpha-l-arabinofuranosidase 1-like isoform x1
Os10g0348900	-4.27947	0.000143826	0.00298159	retrotransposon ty1-copia subclass
Os05g0549232	-1.35874	0.000145573	0.0030156	-
Os03g0671800	-1.9067	0.000146494	0.00303023	transcription factor bhlh18-like
Os08g0258600	-6.03764	0.000146747	0.00303226	-
Os10g0450400	-2.36668	0.000146807	0.00303226	uncharacterized protein loc4348765
Os03g0860100	-4.50333	0.000153175	0.00315686	ethylene-responsive transcription factor 1b
Os02g0532800	-1.33272	0.000153804	0.0031675	-
Os06g0481200	-2.38411	0.000154099	0.00317128	polygalacturonase at1g48100-like
Os08g0489300	-1.37913	0.000154654	0.00318037	dna-3-methyladenine glycosylase
Os08g0203400	-6.15101	0.000155048	0.00318616	probable lrr receptor-like serine threonine-protein kinase at1g56130
Os08g0155550	-1.43942	0.000155308	0.00318919	protein nrt1 ptr family -like
Os06g0695300	-2.80998	0.000159663	0.00327146	peroxidase 45-like
Os04g0142850	-1.39108	0.000159851	0.00327209	uncharacterized protein loc101768196 isoform x1
Os03g0407050	-1.81347	0.000161187	0.00329552	-
Os10g0578800	-1.97068	0.000165316	0.00336289	#NAME?
Os09g0365100	-1.11265	0.000165457	0.00336334	-
Os05g0427900	-1.99029	0.00016585	0.00336891	dnaj protein homolog 1-like
Os03g0356582	-1.25909	0.000167667	0.00340336	phosphatidylinositol 4-phosphate 5-kinase 6
Os09g0471800	-1.15955	0.000168931	0.00342656	wall-associated receptor kinase-like 16
Os04g0688300	-1.86774	0.00016999	0.00344557	cationic peroxidase spc4
Os12g0433066	-2.04679	0.000173757	0.00351184	e3 ubiquitin-protein ligase el5-like
Os06g0136600	-1.10149	0.000175127	0.00353698	enolase 1
Os02g0767300	-1.72741	0.000176791	0.0035655	flavonol synthase flavanone 3-hydroxylase
Os11g0482200	-2.96968	0.00018219	0.0036535	-
Os09g0313600	-1.90832	0.000183922	0.00368562	disease resistance protein rga3
Os01g0934100	-1.37817	0.000184972	0.00370402	protein src2
Os08g0144100	-5.91615	0.000185799	0.00371796	probable calcium-binding protein cml27
Os03g0125100	-1.07008	0.00018786	0.00375123	beta-carotene 3- chloroplastic
Os08g0203201	-2.02389	0.000188227	0.00375589	probable lrr receptor-like serine threonine-protein kinase at1g56140
Os04g0540200	-1.31063	0.000189413	0.00377423	b-box zinc finger protein 20-like
Os08g0495500	-1.32624	0.000191375	0.00380527	TD and POZ domain-containing protein 1
Os06g0221300	-2.34341	0.000192323	0.00382143	-
Os01g0111500	-1.44823	0.000194339	0.00385836	transcription factor bhlh83
Os07g0643700	-1.53215	0.000194455	0.00385836	probable carboxylesterase 18
Os08g0501500	-1.25383	0.000194867	0.00386381	wall-associated receptor kinase 5
Os07g0126301	-6.7577	0.000196962	0.00389988	pathogenesis-related protein 1-like
Os06g0549900	-2.51309	0.000197357	0.00390497	inactive tetrahydrocannabinolic acid synthase-like
Os05g0525200	-1.50583	0.000202137	0.00399349	Probable LRR receptor-like protein kinase At1g51890
Os09g0474000	-1.2728	0.000204389	0.00403278	bzip transcription partial
Os01g0848900	-1.19108	0.000206431	0.00407023	-
Os06g0239500	-1.43119	0.000207586	0.00408731	protein nrt1 ptr family
Os04g0640600	-1.28005	0.000207808	0.00408883	shikimate kinase chloroplastic
Os01g0341750	-2.85159	0.000210417	0.00413727	cysteine-rich receptor-like protein kinase 15
Os02g0678200	-1.11108	0.000210991	0.00414567	spx domain-containing membrane protein _17046
Os02g0732350	-1.61058	0.000212742	0.00417583	Uncharacterized protein At1g66480
Os03g0165300	-1.69853	0.000212959	0.00417583	bel1-like homeodomain protein 7
Os01g0781200	-1.52014	0.000218846	0.00428397	rp1-like protein
Os04g0401900	-1.21408	0.00021894	0.00428397	uncharacterized protein loc101768457 isoform x1
Os11g0473832	-1.08521	0.000219516	0.00429226	serine decarboxylase 1-like
Os05g0561400	-1.84501	0.000227945	0.00443864	-
Os04g0183300	-1.37923	0.000228497	0.00444631	amidase arb_02965
Os07g0614400	-1.90492	0.000229057	0.00445202	-
Os11g0104866	-3.54704	0.000229105	0.00445202	clathrin heavy chain 1-like
Os04g0649500	-1.30323	0.000231734	0.00449524	-
Os07g0211101	-1.47683	0.000231807	0.00449524	-
Os04g0404800	-1.16729	0.000232148	0.00449876	acetyl-coenzyme a chloroplastic glyoxysomal
Os12g0640200	-3.32355	0.000235632	0.00455066	premnaspirodiene oxygenase-like
Os08g0434566	-1.31652	0.000236065	0.00455382	probable mannan synthase 11
Os08g0203700	-1.69111	0.000236118	0.00455382	probable lrr receptor-like serine threonine-protein kinase at1g56130
Os11g0667700	-1.83273	0.000236405	0.00455625	serine threonine-protein kinase-like protein ccr3
Os01g0347200	-1.26357	0.000237459	0.00457106	uncharacterized protein loc100837437
Os12g0109200	-1.30018	0.000237821	0.00457106	kda protein
Os05g0399300	-1.59794	0.000240356	0.00461036	protein
Os10g0509900	-2.49652	0.00024382	0.00466729	-
Os05g0134800	-1.80067	0.000245352	0.00469026	peroxidase 2-like
Os04g0555300	-1.60942	0.000246557	0.00470692	glycerol-3-phosphate transporter 1
Os01g0228400	-5.71779	0.000249018	0.00474748	Pentatricopeptide repeat-containing protein At5g25630
Os01g0504500	-1.01439	0.00025059	0.00476722	protein detoxification 12
Os09g0321200	-5.97345	0.000250729	0.00476722	carotenoid (9 )-cleavage dioxygenase-like
Os08g0200500	-1.16032	0.000251953	0.00478406	serine threonine-protein kinase
Os03g0576200	-1.19224	0.000255291	0.00484156	potassium transporter
Os06g0107800	-3.07122	0.000255421	0.00484156	b3 domain-containing protein os06g0107800-like
Os09g0328800	-1.11978	0.000255813	0.00484203	uncharacterized protein loc107277727 isoform x5
Os05g0493800	-1.46249	0.000255864	0.00484203	wat1-related protein at5g07050
Os12g0174300	-1.25169	0.000259414	0.00490264	uncharacterized protein partial
Os02g0643800	-1.1516	0.000260205	0.00491229	saur11 - auxin-responsive saur family member
Os07g0557100	-1.08644	0.000260861	0.0049201	equilibrative nucleotide transporter 3-like
Os04g0450600	-1.45626	0.000274629	0.00514243	fk506-binding protein 2
Os08g0455600	-1.84432	0.00027641	0.0051685	serine threonine-protein phosphatase pp1-like
Os12g0617800	-1.15371	0.000283215	0.00529225	k(+) efflux antiporter chloroplastic
Os06g0175800	-2.04662	0.000286499	0.00534361	cystathionine beta- chloroplastic
Os01g0570601	-2.45114	0.000286638	0.00534361	Os01g0570601 [Oryza sativa Japonica Group]
Os08g0550200	-2.37476	0.000286721	0.00534361	protein transparent testa 12-like
Os12g0502800	-1.4075	0.00028714	0.00534789	ureide permease 1-like isoform x1
Os01g0164075	-2.46737	0.000294168	0.00546437	-
Os08g0531600	-1.64417	0.000298986	0.00554426	squamosa promoter-binding-like protein 16
Os12g0277000	-1.46779	0.000299058	0.00554426	u-box domain-containing protein 44-like
Os11g0664400	-2.34821	0.000301253	0.00557397	-
Os03g0769700	-1.28766	0.000301851	0.00558137	uncharacterized protein loc4334252
Os07g0630400	-2.06322	0.000306925	0.00566038	ribonuclease 1
Os03g0751600	-1.03969	0.000309122	0.00569717	heavy metal-associated domain containing expressed
Os04g0390500	-1.05982	0.000310186	0.00570932	probable metal-nicotianamine transporter ysl6
Os01g0681200	-1.02185	0.000311059	0.00571795	long chain acyl- synthetase 4-like
Os05g0105050	-2.43031	0.000312286	0.00573549	methionine s-methyltransferase isoform x1
Os03g0822400	-1.20197	0.000312623	0.00573549	uncharacterized protein loc4334610
Os01g0878800	-1.0297	0.000316823	0.00579372	#NAME?
Os07g0692800	-3.01783	0.00031985	0.00584528	eukaryotic translation initiation factor 2 subunit alpha
Os01g0211000	-5.71999	0.000321967	0.00587369	sterol c-22 desaturase -like
Os01g0952900	-1.47687	0.000328716	0.00598794	-
Os01g0635200	-3.14102	0.000331003	0.00602571	protein radialis-like 3
Os07g0250900	-1.00582	0.000340361	0.00618808	protein yls9-like
Os08g0446400	-1.01508	0.000340693	0.00619013	receptor-like protein kinase
Os01g0239200	-1.29925	0.000343195	0.00622757	triose phosphate phosphate translocator chloroplastic
Os05g0442700	-1.81773	0.000345838	0.00627151	nac domain-containing protein 90-like
Os03g0291700	-1.3935	0.000351979	0.00636797	protein trichome birefringence-like 28
Os02g0608500	-1.02622	0.00035253	0.00636797	serine threonine-protein kinase sty17
Os06g0109500	-1.21815	0.000352736	0.00636797	haloacid dehalogenase-like hydrolase domain-containing protein sgpp
Os07g0538000	-2.06685	0.000357252	0.00643714	beta- -glucanase
Os01g0850700	-1.72263	0.000358524	0.00645183	tpa: laccase family protein
Os05g0320700	-1.41437	0.000359972	0.00647376	trans-cinnamate 4-monooxygenase
Os09g0530275	-3.15277	0.000361624	0.00649933	cytochrome p450 71a1-like
Os04g0677400	-1.27061	0.000364495	0.00654261	uncharacterized protein loc4337405 isoform x1
Os08g0530300	-1.93987	0.000366513	0.00657464	exocyst complex component exo70b1
Os11g0172100	-3.32424	0.000366872	0.00657692	pectinesterase 2-like
Os12g0577200	-1.32337	0.0003693	0.00661204	uncharacterized protein loc4352618
Os05g0111800	-1.40122	0.000381674	0.00682494	protein phosphatase 2c 46
Os03g0720300	-1.12671	0.000382569	0.0068366	glutamate decarboxylase 1
Os01g0800500	-2.22236	0.000384075	0.00685917	nucleotide pyrophosphatase phosphodiesterase
Os06g0303800	-1.22076	0.000389844	0.00693589	gpi-anchored protein
Os01g0793800	-2.75338	0.000390923	0.0069507	-
Os05g0135450	-2.45129	0.000395169	0.00701735	peroxidase 5-like
Os08g0111500	-1.50133	0.000398268	0.00706359	uncharacterized acetyltransferase at3g50280-like
Os02g0695900	-1.38827	0.00039981	0.00708195	oligopeptide transporter 4-like
Os04g0439100	-1.15927	0.00040119	0.00709961	-
Os11g0673900	-1.55532	0.000402164	0.00711026	disease resistance rpp13-like protein 4
Os04g0365100	-2.80719	0.000405295	0.00715666	wall-associated receptor kinase-like 16
Os05g0135400	-2.58015	0.000408686	0.00721204	peroxidase 5-like
Os10g0395200	-1.47501	0.000410911	0.00724676	stress enhanced protein chloroplastic-like
Os12g0227500	-1.35495	0.000412198	0.0072604	32 kda protein
Os09g0429200	-1.55224	0.000413023	0.00726615	glutamate receptor -like
Os05g0582500	-2.27376	0.000413155	0.00726615	serine carboxypeptidase-like 50
Os08g0102700	-1.07483	0.000413572	0.00726647	vamp protein sec22
Os01g0831250	-2.14924	0.000420587	0.00736223	ammonium transporter
Os04g0684100	-2.32289	0.000433422	0.00757282	-
Os03g0637600	-1.25897	0.000434705	0.00758584	leucine-rich repeat extensin-like protein 6
Os07g0481400	-1.02165	0.000436855	0.00761396	disease resistance protein rga3
Os04g0529700	-1.63138	0.000442438	0.0076828	uncharacterized protein at4g19900-like
Os01g0687400	-1.41762	0.000446233	0.00774394	acidic endochitinase-like
Os06g0109801	-2.49786	0.000448616	0.00778051	probable gluconokinase
Os05g0104200	-2.11386	0.000450456	0.00780284	Polygalacturonase inhibitor 2
Os05g0442400	-3.59375	0.000451326	0.00781311	transcription factor divaricata-like
Os03g0412400	-2.44631	0.000454447	0.00786232	-
Os06g0676700	-1.56377	0.000459818	0.0079358	probable alpha-glucosidase os06g0675700
Os10g0547200	-1.62561	0.000465351	0.00800681	uncharacterized protein at1g08160-like
Os02g0286933	-1.8244	0.00046619	0.00801637	cell number regulator 10 isoform x1
Os02g0711400	-1.4015	0.000471674	0.0081008	uncharacterized protein loc4330497
Os04g0678400	-1.03825	0.00047417	0.00813872	dof zinc finger
Os09g0385700	-1.88614	0.000474767	0.00814401	zinc finger an1 domain-containing stress-associated protein 12
Os01g0597800	-1.10696	0.000476641	0.00816623	scopoletin glucosyltransferase-like
Os02g0112600	-2.28937	0.00047885	0.00819413	high affinity nitrate transporter
Os03g0258900	-1.00687	0.000481243	0.00822014	-
Os04g0175450	-2.49049	0.000489231	0.00833025	benzyl alcohol o-benzoyltransferase
Os01g0735300	-2.44145	0.000489754	0.00833025	anthocyanidin -o-glucosyltransferase
Os11g0702400	-5.6316	0.000491511	0.0083551	zinc finger protein zat12-like
Os10g0341101	-3.12506	0.000493263	0.00837983	nuclease harbi1
Os08g0484200	-4.01402	0.000493965	0.00838672	e3 ubiquitin-protein ligase atl6-like
Os04g0551200	-1.28573	0.000500282	0.00848886	malate cytoplasmic-like
Os02g0612900	-2.27747	0.000503145	0.00851697	temperature-induced lipocalin-1
Os11g0109700	-1.44553	0.000504296	0.00853134	uncharacterized protein loc102702810
Os07g0571200	-1.59962	0.000506162	0.00855778	-
Os06g0316300	-3.88322	0.000506948	0.00856594	-
Os08g0392100	-1.22738	0.000523341	0.00881129	diboa-glucoside dioxygenase bx6
Os11g0461200	-2.3751	0.000531108	0.00892078	anthocyanidin 3-o-glucosyltransferase-like
Os01g0371500	-2.07239	0.000536814	0.00900055	glutathione transferase
Os04g0526600	-1.3535	0.000537335	0.00900395	alpha amylase partial
Os09g0409000	-1.68566	0.00053926	0.0090255	-
Os08g0556300	-2.12471	0.000542225	0.00906974	accelerated cell death partial
Os09g0464066	-5.47216	0.000550886	0.0091874	-
Os11g0239500	-2.18018	0.000557339	0.00927311	probable carboxylesterase 18
Os07g0170016	-1.04424	0.000566706	0.00941232	short-chain type dehydrogenase reductase
Os05g0365000	-1.0933	0.00056921	0.00944279	phytochrome a-associated f-box protein
Os01g0227800	-5.86823	0.000571694	0.00947493	cytochrome p450 71a1
Os07g0570100	-1.24536	0.000571818	0.00947493	zinc- peroxisomal
Os09g0564000	-2.5984	0.000575622	0.00951563	thiol protease sen102-like
Os11g0186200	-1.13981	0.0005768	0.00952951	aldehyde dehydrogenase family 3 member h1
Os03g0813700	-3.99858	0.000577365	0.00953328	uncharacterized protein loc9266246 isoform x1
Os05g0363566	-1.4173	0.000578367	0.00953866	-
Os06g0716100	-1.28767	0.000582127	0.00958948	chaperone protein dnaj 11
Os11g0270500	-3.19924	0.000590695	0.00970231	disease resistance rpp13-like protein 2
Os07g0617100	-1.02437	0.000594258	0.00974382	disease resistance response
Os07g0503900	-1.6148	0.000598099	0.00980111	anthocyanidin 3-o-glucosyltransferase 2-like
Os02g0112100	-2.89472	0.000601768	0.00985553	high affinity nitrate transporter
Os01g0347300	-1.95101	0.000610309	0.00997805	uncharacterized protein loc9266029
Os01g0152100	-1.70749	0.000617022	0.0100761	-
Os02g0558100	-1.11926	0.000633463	0.0103267	chloride channel protein clc-c
Os11g0570000	-1.52703	0.000634033	0.01033	probable lrr receptor-like serine threonine-protein kinase at3g47570 isoform x1
Os06g0295500	-1.87835	0.000637004	0.0103665	embryogenesis transmembrane
Os12g0637100	-1.28328	0.00063769	0.0103716	purple acid phosphatase 2
Os04g0219600	-5.79772	0.000642828	0.0104432	disease resistance protein rpm1-like
Os11g0592100	-2.25159	0.000647211	0.0105047	vacuolar defense protein
Os04g0630900	-2.56512	0.000652826	0.0105873	anthocyanidin reductase
Os02g0626100	-1.14332	0.000657978	0.0106586	phenylalanine ammonia-lyase
Os01g0634900	-1.78713	0.000668086	0.0107729	cbs domain-containing protein mitochondrial-like
Os06g0184400	-1.33634	0.000670551	0.0108003	Formin-like protein 6
Os04g0310200	-1.71486	0.000675145	0.0108652	23 kDa jasmonate-induced protein
Os08g0515700	-1.12009	0.000675345	0.0108652	-
Os01g0376600	-5.55233	0.00068254	0.0109747	-
Os03g0744675	-1.07093	0.000696494	0.0111799	-
Os02g0753900	-2.27741	0.000700349	0.011229	-
Os07g0601600	-1.32425	0.000704619	0.0112783	-
Os07g0129200	-2.15448	0.000705079	0.0112793	pathogenesis-related protein class partial
Os04g0613700	-1.06897	0.000707502	0.0113116	udp-n-acetylglucosamine pyrophosphorylase
Os04g0552200	-2.97761	0.000714598	0.0114057	beta-expansin 2 precursor
Os11g0550500	-1.27975	0.00072196	0.0114972	disease resistance protein at1g50180
Os04g0526300	-2.55197	0.000724679	0.0115275	cytosolic sulfotransferase 8
Os03g0116300	-1.03751	0.000728797	0.0115734	alpha beta fold family expressed
Os07g0609550	-1.13122	0.000734079	0.0116358	-
Os09g0507100	-1.23511	0.000734582	0.0116358	squamosa promoter-binding-like protein 18 isoform x2
Os05g0553400	-1.06905	0.000740807	0.0117246	transcription factor rax2-like
Os11g0649400	-2.17574	0.000746454	0.0117941	casp-like protein 1u1
Os12g0171801	-1.6307	0.000761379	0.0119779	-
Os08g0451200	-1.92953	0.000761478	0.0119779	-
Os03g0603200	-5.6303	0.000777981	0.0121832	cytochrome p450 78a5-like
Os01g0753800	-1.14857	0.000782832	0.0122456	-
Os05g0367400	-1.46082	0.000784607	0.012262	thiamin pyrophosphokinase 1
Os04g0523500	-5.90577	0.00078475	0.012262	cytokinin dehydrogenase 3-like
Os04g0125800	-1.69659	0.00078705	0.0122883	growth-regulating factor
Os09g0532000	-2.2868	0.000788542	0.0122951	senescence-inducible chloroplast stay-green protein 1
Os03g0752800	-2.11915	0.00078861	0.0122951	mads box protein
Os02g0108800	-1.7081	0.00079211	0.0123292	cytochrome p450 89a2-like
Os08g0434500	-1.28606	0.000793246	0.0123333	probable mannan synthase 11
Os01g0851100	-1.70912	0.000798892	0.012387	uncharacterized protein at1g04910-like
Os08g0416800	-1.5392	0.000800247	0.0123969	-
Os04g0514600	-1.57597	0.000802184	0.0124108	disease resistance protein rps2
Os06g0262800	-5.47562	0.00081302	0.0125578	very-long-chain fatty acid condensing enzyme cut1
Os11g0141333	-1.56825	0.00081802	0.0126074	sulfotransferase domain containing protein
Os01g0176200	-1.14435	0.000819257	0.0126196	udp-glycosyltransferase 73c6
Os08g0368777	-1.21582	0.000820256	0.0126264	nucleobase-ascorbate transporter 2-like
Os06g0658500	-1.21538	0.000820594	0.0126264	uncharacterized protein loc102700499 isoform x5
Os02g0601500	-3.64777	0.000824237	0.0126756	premnaspirodiene oxygenase-like
Os02g0188000	-1.15306	0.000824964	0.0126791	limonoid udp-glucosyltransferase
Os11g0156000	-1.37389	0.000831521	0.01274	b3 domain-containing protein os11g0156000-like
Os03g0331700	-1.25387	0.000831587	0.01274	probable calcium-binding protein cml27
Os10g0555700	-1.44985	0.000852284	0.0129936	beta-expansin 1a expressed
Os07g0573400	-1.236	0.000855119	0.0130298	uncharacterized protein loc4343684
Os01g0589200	-1.07749	0.000858479	0.013074	methyltransferase ddb_g0268948
Os01g0280200	-1.11731	0.000872423	0.0132577	protein iq-domain 14-like
Os01g0669100	-1.81584	0.000873819	0.0132647	receptor protein kinase 1
Os11g0149200	-1.74196	0.000877992	0.0133137	uncharacterized protein loc4349779
Os01g0915900	-2.65513	0.000878522	0.0133146	-
Os06g0328400	-1.46381	0.000889574	0.0134683	probable l-type lectin-domain containing receptor kinase
Os12g0578200	-4.1142	0.000889619	0.0134683	chorismate mutase chloroplastic
Os11g0629600	-1.008	0.000892208	0.0135003	disease resistance rpp13-like protein 3
Os07g0629300	-2.24976	0.000898244	0.0135704	aleurone ribonuclease
Os11g0112200	-1.91879	0.000899092	0.0135704	cationic peroxidase 1-like
Os04g0538000	-1.06155	0.000899473	0.0135704	elongation factor g- chloroplastic
Os07g0561500	-2.23251	0.000905042	0.0136256	short-chain type dehydrogenase reductase
Os02g0227600	-1.1233	0.000905317	0.0136256	receptor-like protein kinase hsl1
Os01g0800900	-1.8168	0.00090631	0.0136333	Probable F-box protein At5g04010
Os03g0301950	-1.09161	0.000914071	0.0137354	peroxisomal membrane protein 11-3
Os12g0640550	-1.76123	0.000916657	0.0137515	cation h(+) antiporter 28
Os04g0524600	-1.68036	0.000917088	0.0137515	probable metal-nicotianamine transporter ysl12
Os06g0216700	-1.40969	0.000923501	0.0138256	blue copper
Os04g0597300	-1.31573	0.000925692	0.0138437	probable wrky transcription factor 35
Os06g0689700	-1.71188	0.000929797	0.0138977	hypothetical protein OsI_24252 [Oryza sativa Indica Group]
Os03g0149800	-1.01248	0.000936977	0.0139902	ring-h2 finger protein atl16-like
Os01g0879300	-3.00308	0.000960371	0.0142942	dirigent protein 19-like
Os03g0189600	-2.15141	0.000962468	0.0143103	alcohol dehydrogenase-like 2
Os09g0399800	-1.5113	0.000970445	0.0143986	cinnamyl alcohol dehydrogenase
Os02g0753500	-1.29654	0.000974108	0.0144378	TPR repeat-containing thioredoxin TTL1
Os01g0785900	-1.33897	0.000978356	0.0144779	c2h2 zinc finger protein
Os10g0574400	-1.55031	0.000984342	0.0145513	ring-h2 finger protein atl29
Os11g0222900	-1.77601	0.000996522	0.0147005	disease resistance protein rpp13
Os12g0134000	-1.02886	0.00100096	0.0147582	hydroxymethylglutaryl- mitochondrial-like
Os01g0192900	-1.33672	0.00100497	0.0148096	1-aminocyclopropane-1-carboxylate synthase 7
Os12g0127200	-1.56512	0.00101573	0.0149293	uncharacterized protein loc103704991
Os08g0189900	-2.95134	0.00102169	0.0150034	germin a
Os12g0614100	-3.21404	0.00103167	0.0151085	lipase family protein
Os06g0218300	-2.05131	0.0010329	0.0151186	ring zinc finger domain superfamily protein
Os01g0819700	-1.42031	0.00105006	0.0152985	uncharacterized protein loc4339114
Os04g0223300	-1.36561	0.00105999	0.0154272	probable l-ascorbate peroxidase 3
Os10g0185400	-1.23012	0.0010619	0.015444	21 kda
Os03g0684700	-1.34918	0.00106435	0.0154668	uncharacterized protein loc4333744
Os03g0848700	-1.0325	0.00106855	0.0155038	disease resistance protein rga2 isoform x1
Os05g0320800	-1.1804	0.00106959	0.015511	-
Os01g0930950	-1.22885	0.00107731	0.0156149	-
Os06g0675600	-1.70487	0.00108239	0.0156725	nac domain-containing protein 21 22
Os10g0340100	-5.8013	0.00108999	0.0157501	Os10g0340100, partial [Oryza sativa Japonica Group]
Os07g0638400	-1.42265	0.00109825	0.0158614	1-cys peroxiredoxin per1
Os10g0531900	-1.4584	0.00109987	0.0158767	transcription factor rf2b-like
Os12g0210400	-2.23737	0.00110928	0.0159744	probable leucine-rich repeat receptor-like protein kinase at5g49770
Os08g0239300	-1.58311	0.00110941	0.0159744	endo- -beta-d-glucanase
Os04g0688100	-1.00023	0.00110947	0.0159744	anionic peroxidase
Os09g0242800	-1.30264	0.00111693	0.0160572	e3 ubiquitin-protein ligase cip8-like
Os04g0115900	-1.0002	0.00112828	0.0161736	-
Os10g0579600	-1.09872	0.00112845	0.0161736	protein nrt1 ptr family -like
Os11g0474900	-3.34946	0.00112927	0.0161771	stemar-13-ene synthase isoform x1
Os09g0571200	-1.77861	0.0011334	0.0162198	protein src2 homolog
Os10g0550775	-3.21292	0.00113538	0.0162398	probable sucrose-phosphate synthase 5
Os02g0262800	-2.77014	0.00114343	0.0163384	disease resistance protein rga3
Os10g0477900	-2.07931	0.00114628	0.0163543	anthocyanidin reductase-like
Os09g0546700	-3.15864	0.00115718	0.0164381	auxin-responsive protein saur36-like
Os10g0544200	-1.41469	0.00115739	0.0164381	transcription factor bhlh93-like
Os02g0539200	-5.47992	0.00116856	0.0165717	e3 ubiquitin-protein ligase pub23-like
Os09g0473883	-1.49327	0.00117551	0.0166535	Os09g0473883 [Oryza sativa Japonica Group]
Os03g0421300	-5.38336	0.00119506	0.0169051	-
Os07g0245100	-1.23065	0.00120196	0.0169857	cytidine deaminase
Os11g0623800	-5.46819	0.00120261	0.0169863	disease resistance rpp13-like protein 4
Os11g0664000	-2.92098	0.0012057	0.0169985	serine threonine-protein kinase-like protein ccr3
Os04g0685000	-1.229	0.00120977	0.0170279	-
Os11g0660300	-1.20426	0.00122477	0.0172219	wd repeat-containing protein 61
Os02g0201300	-1.68975	0.00122874	0.0172604	-
Os02g0252200	-1.30168	0.0012348	0.0173198	nac domain-containing protein 76-like
Os06g0646600	-1.09865	0.00125733	0.0175825	homeobox protein knotted-1-like 11 isoform x1
Os06g0707800	-1.09002	0.0012579	0.0175825	disease resistance protein rga1
Os03g0126700	-1.05834	0.00126554	0.0176806	heavy metal-associated domain containing expressed
Os02g0530300	-1.07861	0.00127187	0.0177251	zinc finger a20 and an1 domain-containing stress-associated protein 5-like
Os12g0414500	-1.11045	0.00127322	0.0177352	asparagine--trna cytoplasmic 2
Os01g0588900	-1.25036	0.00127396	0.0177369	carboxy-lyase
Os09g0376600	-1.80016	0.00127508	0.0177437	probable inactive receptor kinase at2g26730
Os06g0705700	-3.9536	0.00127892	0.0177708	protein nrt1 ptr family -like
Os06g0499100	-1.36914	0.00132338	0.0182985	uncharacterized protein loc107277573
Os06g0118075	-3.00687	0.00133983	0.0185078	protein aspartic protease in guard cell 2
Os01g0587500	-1.38505	0.00134496	0.0185606	kda heat shock
Os03g0229100	-1.27752	0.00134868	0.0185847	transcription factor bhlh18-like
Os10g0535600	-1.6763	0.00135113	0.0186093	uncharacterized protein loc4349234 isoform x2
Os05g0273500	-1.11057	0.00136542	0.0187787	uncharacterized protein loc4338269 isoform x1
Os05g0179300	-1.15813	0.00136861	0.0188067	3 -n-debenzoyl-2 -deoxytaxol n-benzoyltransferase-like
Os08g0235800	-1.01358	0.00138866	0.0190611	hkt1 2 transporter
Os04g0162500	-1.01507	0.00139605	0.0191347	zinc finger protein zat5-like
Os11g0137200	-1.09907	0.00140592	0.0192338	hydroxymethylglutaryl- mitochondrial-like
Os03g0108500	-2.57471	0.00140897	0.019265	methylsterol monooxygenase 1-1-like
Os09g0530200	-2.07882	0.00142365	0.0194281	endoglucanase 23-like
Os01g0311800	-2.41877	0.00143421	0.0195345	probable pectinesterase pectinesterase inhibitor 41
Os08g0519300	-5.28248	0.00144278	0.0196228	xylanase inhibitor protein 1-like
Os11g0239200	-5.38643	0.00145708	0.0198078	serpin family protein
Os10g0477600	-1.36265	0.00146225	0.019842	nac domain-containing protein 21 22-like
Os02g0623300	-1.3562	0.00147203	0.0199629	nac domain-containing protein 92
Os01g0615000	-1.60901	0.00147599	0.0199874	-
Os01g0751400	-2.47525	0.00147603	0.0199874	uncharacterized protein partial
Os01g0653300	-5.28657	0.00147879	0.0199874	-
Os01g0495701	-1.06701	0.00147986	0.0199922	-
Os10g0151366	-1.38319	0.00148362	0.0200239	Os10g0151366, partial [Oryza sativa Japonica Group]
Os09g0483300	-5.28737	0.00148514	0.0200315	uncharacterized protein loc4347410
Os05g0212900	-2.66089	0.0014856	0.0200315	bisdemethoxycurcumin synthase-like
Os08g0243500	-1.2148	0.00148711	0.0200354	nadph--cytochrome p450 reductase
Os09g0275200	-2.18841	0.00149176	0.0200762	skp1-like protein 1a
Os02g0736900	-1.70583	0.00150938	0.0202746	Os02g0736901, partial [Oryza sativa Japonica Group]
Os01g0323600	-1.77373	0.00151088	0.0202851	s-adenosylmethionine synthase 1
Os12g0259800	-1.16375	0.00152181	0.0203931	lac25_orysj ame: full=laccase-25 ame: full=benzenediol:oxygen oxidoreductase 25 ame: full=diphenol oxidase 25 ame: full=urishiol oxidase 25 flags: precursor
Os01g0608400	-1.90049	0.00153095	0.0204935	wheat leaf rust resistance partial
Os12g0225900	-2.30623	0.00153148	0.0204935	2-alkenal reductase (nadp(+)-dependent)
Os01g0696701	-1.70518	0.00153519	0.0205173	abc transporter b family member 4-like
Os05g0189900	-3.39665	0.00154467	0.0206211	acid phosphatase
Os07g0411300	-2.21779	0.00155548	0.0207458	chalcone synthase
Os06g0185400	-1.86051	0.00155661	0.020747	udp-arabinopyranose mutase 3
Os02g0582100	-2.04442	0.00155703	0.020747	-
Os02g0228300	-2.07258	0.00157015	0.0208921	receptor-like protein kinase 5
Os11g0616700	-1.56824	0.00159972	0.0211905	uncharacterized protein loc107278312
Os10g0532600	-1.09749	0.00160167	0.0212016	transcription repressor ofp7-like
Os10g0478300	-1.01554	0.00161122	0.0212882	myb-related protein myb4-like
Os01g0863800	-1.53976	0.00163359	0.0214832	transcription repressor ofp13-like
Os06g0664300	-1.01963	0.00163921	0.021547	vacuolar-sorting receptor 6
Os12g0117400	-2.05571	0.00164574	0.021614	root phototropism protein 2-like
Os09g0422500	-1.29418	0.00164584	0.021614	cellulose synthase a catalytic subunit 9
Os06g0243900	-2.77848	0.00164662	0.0216142	benzothiadiazole-induced s-adenosyl-l-methionine:salicylic acid carboxyl methyltransferase 1
Os05g0591600	-1.87406	0.00168622	0.0220558	carboxy-lyase
Os03g0197300	-2.67992	0.0016865	0.0220558	vicilin-like antimicrobial peptides 2-2
Os12g0609500	-1.13857	0.00169585	0.0221574	c-factor
Os08g0527733	-3.12428	0.00170483	0.0222541	protein nrt1 ptr family -like
Os01g0841700	-1.70873	0.00170561	0.0222541	elicitor-responsive protein 1
Os12g0148400	-1.11616	0.00171116	0.0222958	proteasome-associated protein ecm29 homolog isoform x1
Os07g0253100	-1.16701	0.00173679	0.0226043	Os07g0253100, partial [Oryza sativa Japonica Group]
Os05g0176300	-1.76952	0.00173877	0.0226043	-
Os06g0367500	-1.21893	0.00174258	0.0226423	b-cell receptor-associated protein 31-like
Os09g0357400	-1.52821	0.00175899	0.0228345	inactive disease susceptibility protein lov1 isoform x1
Os05g0249100	-2.2723	0.00176031	0.0228412	unknown protein [Oryza sativa Japonica Group]
Os11g0303300	-1.8676	0.0017617	0.0228474	probable o-methyltransferase 2
Os12g0583700	-2.14296	0.00176723	0.0228993	zinc finger protein 1-like
Os03g0167400	-1.30686	0.00178969	0.0231413	-
Os07g0580766	-2.00833	0.00179021	0.0231413	uncharacterized protein loc100821692
Os01g0727700	-2.30017	0.00179121	0.0231413	uncharacterized protein loc9272673
Os07g0120000	-5.47508	0.00179164	0.0231413	-
Os09g0428600	-1.87819	0.00182539	0.0234806	glutamate receptor -like
Os05g0196200	-1.19308	0.00182822	0.0234956	pollen-specific protein sf21-like
Os10g0208500	-1.01569	0.00182934	0.0234993	retrotransposon unclassified
Os04g0389800	-1.81801	0.00183909	0.0236031	acetolactate synthase
Os02g0779650	-1.74909	0.00184495	0.0236627	Os02g0779650, partial [Oryza sativa Japonica Group]
Os06g0610800	-2.25393	0.00187978	0.0240269	aspartic proteinase nepenthesin-1 precursor
Os06g0354500	-1.23638	0.00189157	0.024134	acyl-coenzyme a oxidase peroxisomal-like
Os02g0227100	-1.83821	0.00191747	0.0244023	-
Os02g0129800	-1.21453	0.00196814	0.0249195	-
Os06g0651900	-1.32329	0.00198485	0.0251197	hydrophobic protein osr8
Os07g0546200	-1.43602	0.0019914	0.0251801	-
Os08g0178700	-1.06606	0.00199491	0.0252131	diacylglycerol kinase 5-like
Os05g0220500	-2.30307	0.00202118	0.0254882	-
Os10g0323500	-2.53228	0.00205049	0.0258001	beta-glucosidase 6
Os10g0464000	-1.80809	0.00205197	0.0258073	hypersensitive-induced response protein 1
Os05g0162000	-1.63745	0.00206437	0.0259401	partial
Os04g0470500	-1.30235	0.00209165	0.026213	disease resistance protein rps2-like
Os09g0409100	-3.44584	0.00213551	0.0266797	-
Os03g0100040	-5.28309	0.00214571	0.0267866	ribose-phosphate pyrophosphokinase 1-like
Os07g0214900	-2.33852	0.00214597	0.0267866	chalcone synthase
Os09g0462850	-5.18196	0.00214936	0.0268171	-
Os11g0224040	-5.18237	0.00215213	0.0268399	uncharacterized protein loc107279453
Os03g0180600	-1.64219	0.00216404	0.0269765	uncharacterized protein loc4331830
Os08g0256000	-1.12763	0.00217275	0.0270554	uncharacterized protein loc4345100
Os03g0856000	-1.10565	0.00217679	0.0270876	s-norcoclaurine synthase 1-like
Os04g0119800	-3.54298	0.00217914	0.0271048	lrr receptor-like serine threonine-protein kinase erecta isoform x1
Os01g0952800	-1.05942	0.00218499	0.0271657	transcription factor bhlh100-like
Os02g0179200	-2.17127	0.00218989	0.0272146	glutamine amidotransferase-like protein
Os06g0527100	-1.10563	0.00219643	0.0272839	cyclic nucleotide-gated ion channel 1-like isoform x1
Os04g0480900	-1.26908	0.00219773	0.0272879	uncharacterized protein loc4336181
Os01g0106300	-1.39066	0.0022223	0.0275007	isoflavone reductase homolog irl-like
Os09g0313550	-1.34665	0.00225496	0.0278151	disease resistance protein rga3
Os10g0553300	-1.3288	0.00225943	0.0278581	probable trehalose-phosphate phosphatase 2
Os02g0187800	-1.17847	0.00228009	0.0281006	cinnamyl alcohol dehydrogenase
Os07g0111700	-1.33736	0.00229562	0.0282427	dimethylaniline monooxygenase
Os01g0920100	-1.14683	0.00231015	0.0283596	Uncharacterized protein At3g27210
Os04g0100300	-5.6955	0.00231438	0.0283746	formin-like protein 18
Os12g0163700	-1.00816	0.00232352	0.0284587	actin- expressed
Os05g0129800	-2.92373	0.0023267	0.0284761	wrky dna-binding protein
Os09g0100800	-1.03128	0.00234026	0.0285925	-
Os03g0176700	-1.18223	0.00236356	0.0288024	uncharacterized protein loc105056435
Os04g0384000	-1.13344	0.00238794	0.0290744	uncharacterized protein loc4335648
Os02g0817700	-1.18122	0.00241662	0.0293729	3-ketoacyl- thiolase peroxisomal
Os12g0246700	-1.20581	0.00243551	0.0295643	disease resistance protein rpm1-like
Os05g0142000	-2.38406	0.00244569	0.0296624	uncharacterized protein loc4337766
Os08g0526400	-1.38626	0.00245937	0.0297899	rpm1-interacting protein 4 isoform x1
Os08g0398300	-1.42553	0.00247119	0.0298928	abc transporter a family member 7-like
Os06g0128600	-2.62959	0.00248442	0.0299905	probable e3 ubiquitin-protein ligase xbos36
Os10g0520100	-2.1397	0.00249853	0.0301221	-
Os05g0578750	-2.10657	0.00251955	0.0303626	polygalacturonase at1g48100-like
Os05g0535600	-1.35586	0.00253369	0.0305069	type iv inositol polyphosphate 5-phosphatase 3
Os05g0524666	-5.2765	0.0025706	0.0308855	glycine-rich protein 2b
Os02g0282301	-5.2765	0.00257201	0.0308877	hypothetical protein [Oryza sativa Japonica Group]
Os02g0555300	-1.52122	0.00257297	0.0308877	nac transcription factor 29-like
Os07g0438600	-1.10194	0.00257594	0.0308971	subtilisin-like protease
Os01g0705100	-1.78289	0.00259097	0.0310509	germin-like protein 1-2
Os07g0510400	-1.34805	0.00259294	0.0310614	anthocyanidin 3-o-glucosyltransferase 2
Os10g0415100	-2.05155	0.00260041	0.0311245	gaba transporter 1-like
Os08g0170100	-1.25364	0.00260267	0.0311383	disease resistance rpp13-like protein 3 isoform x1
Os09g0341500	-2.38678	0.0026167	0.0312796	uncharacterized protein loc4346786
Os11g0457300	-2.12915	0.00262621	0.0313652	anthocyanidin 3-o-glucosyltransferase-like
Os11g0641300	-1.24301	0.00262719	0.0313652	-
Os01g0771000	-1.22282	0.00264873	0.0315689	protein lurp-one-related 5-like
Os03g0739700	-1.80428	0.00267795	0.0318232	uncharacterized protein loc101311938
Os08g0433500	-1.58595	0.00268132	0.0318498	nac domain-containing protein 41 isoform x2
Os10g0162856	-2.55539	0.002694	0.031987	bisdemethoxycurcumin synthase-like
Os11g0528500	-5.29151	0.00274482	0.0324132	uncharacterized protein loc4350631
Os02g0811400	-2.80373	0.00274697	0.032425	cinnamoyl reductase
Os08g0445000	-1.32832	0.00276243	0.0325803	ring-h2 finger protein atl13-like
Os01g0128700	-1.13968	0.00278318	0.0327562	unnamed protein product [Oryza sativa Japonica Group]
Os08g0200600	-2.87185	0.00278403	0.0327562	nac domain-containing protein 21 22
Os08g0545500	-5.38601	0.00290769	0.0340195	tpa: ap2 erebp transcription factor superfamily protein
Os12g0548501	-1.16991	0.00292656	0.0342159	mpi
Os07g0588400	-1.58706	0.00295214	0.0344579	transcription factor bhlh54-like
Os07g0672600	-1.91806	0.00296182	0.0345566	protein lurp-one-related 11-like
Os10g0341401	-5.17459	0.0029748	0.0346364	cellulose synthase-like protein h1
Os07g0197500	-2.06915	0.00297807	0.0346555	stripe rust resistance protein yr10
Os01g0852100	-1.90173	0.00299135	0.0347721	calmodulin-binding receptor-like cytoplasmic kinase 2
Os04g0309600	-1.1786	0.00299419	0.0347906	sucrose synthase 7
Os09g0518332	-1.05023	0.00300043	0.0348344	udp-glucose:salicylic acid glucosyltransferase
Os04g0496150	-1.7588	0.00300415	0.0348524	(+)-neomenthol dehydrogenase
Os02g0196700	-2.28967	0.00301299	0.0349228	exopolygalacturonase precursor
Os04g0457500	-1.02655	0.00301602	0.0349292	gamma-glutamyltranspeptidase 1-like
Os06g0355300	-2.09774	0.00303804	0.035141	auxin-responsive protein iaa25
Os03g0718000	-1.22131	0.00308524	0.0355848	anthranilate synthase beta subunit chloroplastic-like
Os01g0850550	-1.99903	0.00309139	0.0356412	lac6_orysj ame: full=laccase-6 ame: full=benzenediol:oxygen oxidoreductase 6 ame: full=diphenol oxidase 6 ame: full=urishiol oxidase 6 flags: precursor
Os07g0659300	-1.55289	0.00310328	0.0357615	-
Os12g0570400	-1.85477	0.00314415	0.036161	uncharacterized protein loc4352577
Os11g0156600	-2.07907	0.00319251	0.0366127	hva22-like protein g isoform x1
Os04g0288100	-2.0567	0.00319918	0.0366743	germin-like protein 8-14
Os04g0567200	-3.25477	0.00324577	0.0371029	aluminum-activated malate transporter 10-like
Os06g0689600	-1.2827	0.00326474	0.0372444	cysteine-rich receptor-like protein kinase 23 isoform x4
Os02g0311150	-1.20516	0.00330966	0.0376807	Protein roadkill
Os01g0638800	-1.95257	0.00331316	0.0377054	-
Os01g0126900	-1.54614	0.00339722	0.0385378	multicopper oxidase lpr1-like
Os01g0702300	-2.07538	0.00342206	0.0387572	subtilisin-like protease
Os03g0101300	-1.05279	0.00344342	0.0389331	hexose carrier protein hex6
Os02g0200300	-1.03734	0.00344549	0.0389331	glucan endo- -beta-glucosidase 14
Os12g0284000	-1.0694	0.00346636	0.0391491	Probable E3 ubiquitin-protein ligase HERC2
Os01g0666000	-1.61541	0.00348033	0.0392911	lipid phosphate phosphatase 2-like
Os08g0413200	-2.51566	0.00349905	0.0394709	uncharacterized protein loc4345565
Os06g0199700	-2.82027	0.00350425	0.0394829	uncharacterized protein loc102710847
Os11g0128300	-1.58193	0.00350483	0.0394829	mini zinc finger protein 1-like
Os01g0967700	-2.11339	0.00351252	0.0395281	uncharacterized protein loc4324009
Os01g0819400	-2.85332	0.00352223	0.03959	ubiquitin-conjugating enzyme e2-17 kda
Os05g0169450	-5.18694	0.00352431	0.0395976	-
Os05g0411100	-1.9285	0.00353751	0.0396985	protein nrt1 ptr family -like
Os01g0939100	-1.50175	0.00356671	0.0399791	probable calcium-transporting atpase plasma membrane-type
Os04g0423400	-2.08163	0.00360117	0.0402511	uncharacterized protein loc9272168
Os06g0239200	-1.44371	0.00361711	0.0403992	-
Os01g0737100	-5.70932	0.00362927	0.0404709	-
Os01g0257100	-1.04797	0.00363932	0.040567	rapid alkalinization factor 1 precursor
Os04g0122000	-6.16691	0.00365969	0.0407458	lrr receptor-like serine threonine-protein kinase erecta isoform x1
Os03g0127500	-1.14074	0.0036759	0.0409101	transcription factor rf2b-like
Os08g0481100	-1.36967	0.00370443	0.0411627	restin homolog
Os06g0220500	-1.1092	0.00371484	0.041246	7-deoxyloganetin glucosyltransferase-like
Os02g0818900	-1.35335	0.00372201	0.0412931	uncharacterized protein loc4331157
Os01g0695900	-2.74662	0.00373028	0.0413686	transcription repressor myb5-like
Os08g0477500	-2.01152	0.00373608	0.0414167	patatin-like protein 2
Os10g0100700	-3.18933	0.00376471	0.0416686	probable pyridoxal 5 -phosphate synthase subunit
Os06g0226500	-1.22773	0.00376953	0.0417056	dna binding protein
Os07g0151200	-1.045	0.00377309	0.0417083	probable inositol transporter 2
Os02g0151300	-1.25032	0.00377982	0.041754	endoglucanase 5
Os10g0349300	-2.40784	0.00383164	0.0422273	cortical cell-delineating protein
Os03g0111000	-2.1255	0.00383627	0.0422618	-
Os11g0134900	-1.11561	0.00384821	0.0423438	protein zinc induced facilitator-like 1-like
Os08g0453700	-1.23002	0.0038546	0.0423976	respiratory burst oxidase homolog protein e
Os03g0431600	-1.04785	0.00386092	0.0424341	-
Os08g0521000	-1.46429	0.00386642	0.0424615	uncharacterized protein loc4346069
Os05g0514800	-5.38316	0.00388671	0.0426511	-
Os10g0510200	-2.9132	0.00389211	0.0426938	uncharacterized protein loc107276435
Os07g0693100	-2.14487	0.00391571	0.0429026	pyruvate decarboxylase 1-like
Os01g0360200	-1.26692	0.00391811	0.0429034	respiratory burst oxidase homolog protein b-like
Os04g0512900	-1.03435	0.00392557	0.0429607	disease resistance rpp13-like protein 1
Os09g0464033	-1.0248	0.00395678	0.0432282	beta carbonic anhydrase chloroplastic isoform x1
Os07g0273900	-1.1309	0.00395921	0.0432282	truncated nbs-lrr resistance protein
Os02g0777800	-1.67262	0.00400745	0.0436706	serine threonine-protein kinase at5g01020-like
Os09g0468150	-1.33286	0.004038	0.0439017	clathrin assembly protein at4g40080
Os05g0114400	-1.70627	0.00405631	0.0440331	zinc finger protein zat12-like
Os07g0123800	-1.58286	0.00407231	0.0441219	uncharacterized protein loc4342301
Os10g0100500	-1.5079	0.00411062	0.0444688	u-box domain-containing protein 33-like
Os01g0585600	-1.09597	0.00412939	0.0446454	uncharacterized protein loc102624454 isoform x2
Os06g0133000	-3.17065	0.00413011	0.0446454	granule-bound starch synthase i
Os04g0455700	-2.19007	0.00413722	0.0446879	-
Os10g0437900	-1.7232	0.00414634	0.0447693	hsp20 alpha crystallin family protein
Os05g0582800	-1.17902	0.00418705	0.0451399	serine carboxypeptidase-like 50
Os10g0162300	-1.50701	0.00418884	0.045142	uncharacterized protein loc4348162
Os02g0231700	-2.90724	0.00419851	0.0452288	lrr receptor-like serine threonine-protein kinase
Os04g0367201	-2.29141	0.00423443	0.0455636	wall-associated receptor kinase-like 8
Os02g0306401	-1.60813	0.00425282	0.0457093	nicotianamine aminotransferase
Os10g0529300	-1.22987	0.00426885	0.0458642	glutathione s-transferase
Os11g0614400	-1.40194	0.00430554	0.0462056	patatin-like protein 1
Os06g0268500	-2.13877	0.00436278	0.0466779	disease resistance protein rga2-like isoform x1
Os12g0169950	-1.12932	0.00437062	0.046714	calcium-dependent protein kinase 11
Os02g0584700	-1.32483	0.00437427	0.04673	uncharacterized protein loc9268845
Os02g0644400	-2.46615	0.00440419	0.0470006	kinesin-like protein nack1
Os03g0790500	-1.44458	0.00440845	0.0470063	probable carboxylesterase 15
Os02g0803600	-1.42502	0.00443485	0.0472521	vesicle-associated membrane protein 711
Os01g0678400	-5.06334	0.00449134	0.0477784	uncharacterized protein loc4325271
Os02g0653900	-1.18897	0.0045013	0.0478337	triacylglycerol lipase like protein
Os03g0805600	-2.26177	0.00450341	0.0478382	protochlorophyllide-dependent translocon component chloroplastic
Os07g0620600	-5.0643	0.00450893	0.0478608	uncharacterized protein loc9270645 isoform x1
Os05g0333500	-1.25358	0.00452699	0.0479623	dnaj homolog mitochondrial-like
Os04g0326100	-1.58943	0.00453429	0.0480216	7-deoxyloganetin glucosyltransferase
Os08g0445500	-1.85112	0.00454668	0.0481023	glyoxylate hydroxypyruvate reductase hpr3-like
Os01g0155500	-1.80401	0.00454702	0.0481023	receptor-like protein kinase herk 1
Os04g0500600	-5.06827	0.00458227	0.0482851	Os04g0500600 [Oryza sativa Japonica Group]
Os03g0327100	-1.0852	0.00459819	0.0483898	nac domain-containing protein 100-like
Os04g0550300	-3.16916	0.00461111	0.0484239	Os04g0550300 [Oryza sativa Japonica Group]
Os06g0534500	-2.08726	0.00462838	0.0485447	e3 ubiquitin-protein ligase atl41-like
Os01g0692300	-2.11687	0.00465121	0.0487255	protein plastid movement impaired 2
Os03g0236675	-5.07521	0.00469822	0.0491249	uncharacterized protein loc100827404
Os01g0588000	-1.16902	0.00469936	0.0491249	-
Os03g0734100	-2.12791	0.00472896	0.049354	-
Os07g0199000	-2.13391	0.00475312	0.0495574	-
Os02g0603700	-1.24397	0.00476493	0.0496181	GDSL esterase/lipase At5g03980
Os02g0649900	-1.03404	0.00477741	0.0497016	iron-phytosiderophore transporter protein yellow stripe 1
